# Supplementary material
Source: publisher site journal article supplement (https://www.dovepress.com/get_supplementary_file.php?f=496231.xlsx)
Supplement: Supplementary file 1 [file get_supplementary_file.php]

## Sheet: Sheet1
Supplementary Materials 1: The retention time, molecular formula, peak intensity, and compound names of RMLG
Alignment ID	ESI mode	RT(min)	Average M/z	Metabolite Name	Adduct	Formula	Ontology	RML
Neg_30132	Negative	11.3757	309.207	(11R,12S,13S)-Epoxy-Hydroxyoctadeca-Cis-9-Cis-15-Dien-1-Oic Acid	[M-H]-	C18H30O4	Fatty Acyls	3525534720
Neg_16396	Negative	7.48273	365.181	(1R*,2R*,4R*,8S*)-P-Menthane-1,2,8,9-Tetrol 9-Glucoside	[M-H]-	C16H30O9	Prenol lipids	262065936
Neg_13675	Negative	6.64622	395.192	(1R,2R,4S)-P-Menthane-1,2,8-Triol 8-Glucoside	[M+FA-H]-	C16H30O8	Terpene glycosides	276793664
Neg_21519	Negative	8.7964	529.135	(1R,3R,4S,5R)-3-[(E)-3-(3,4-Dihydroxyphenyl)Prop-2-Enoyl]Oxy-1,5-Dihydroxy-4-[(E)-3-(3-Hydroxy-4-Methoxyphenyl)Prop-2-Enoyl]Oxycyclohexane-1-Carboxylic Acid	[M-H]-	C26H26O12	Cyclic alcohols and derivatives	230658400
Pos_28149	Positive	10.6913	217.158	(1R,4Z,9S)-4-(Hydroxymethyl)-11,11-Dimethyl-8-Methylidenebicyclo[7.2.0]Undec-4-En-3-One	[M-H2O+H]+	C15H22O2	Sesquiterpenoids	3411576832
Pos_27089	Positive	10.2186	619.384	(23R,24R)-3Beta-(Beta-D-Xylopyranosyloxy)-9Beta,19-Cyclo-16Beta,23:16,24-Diepoxy-5Alpha-Lanosta-7-Ene-15Alpha,25-Diol	[M+H]+	C35H54O9	Cycloartanols and derivatives	122078904
Pos_15727	Positive	7.22345	486.261	(2E)-1-[2-(2,4-Dimethoxyphenyl)-6-Hydroxy-3-Azabicyclo[4.4.0]Dec-3-Yl]-3-[4-(M Ethylethyl)Phenyl]Prop-2-En-1-One	[M+Na]+	C29H37NO4	Phenylpiperidines	248670144
Pos_13042	Positive	6.5139	350.126	(2E)-3-Indol-3-Yl-2-(2-1,2,3,4-Tetrahydroisoquinolylcarbonyl)Prop-2-Enenitrile	[M+Na]+	C21H17N3O	Tetrahydroisoquinolines	490406976
Pos_04629	Positive	1.54608	288.145	(2E)-Hexenedioylcarnitine	[M+H]+	C13H21NO6	Fatty Acyls	1070156160
Pos_24502	Positive	9.28557	242.175	(2E,4E)-N-(1,3-Dihydroxy-3-Methylpentan-2-Yl)-2-Methylhexa-2,4-Dienamide	[M+H]+	C13H23NO3	N-acyl amines	329412192
Pos_30095	Positive	11.6094	297.206	(2E,4E,8E)-7,13-Dihydroxy-4,8,12-Trimethyltetradeca-2,4,8-Trienoic Acid	[M+H]+	C17H28O4	Sesquiterpenoids	1465771904
Pos_18577	Positive	7.79395	544.18	(2S,3S)-3-Hydroxy-2-((S)-2-((S)-2-(2-Hydroxy-4-Oxoquinazolin-3(4H)-Yl)-3-(1H-Indol-3-Yl)Propanamido)Propanamido)Butanoic Acid	[M+Na]+	C26H27N5O7	Peptides	497728416
Pos_10819	Positive	5.87228	284.126	(3,4-Dimethoxyphenyl)-N-(1-Ethyl-1-Methylprop-2-Ynyl)Carboxamide	[M+Na]+	C15H19NO3	Dimethoxybenzenes	1490962176
Pos_15825	Positive	7.25123	95.0861	(3E,5Z)-1,3,5-Heptatriene	[M+H]+	C7H10	Unsaturated hydrocarbons	701792960
Neg_13845	Negative	6.70193	230.997	(4-Formyl-2-Methoxyphenyl)Oxidanesulfonic Acid	[M-H]-	C8H8O6S	Phenylsulfates	508080928
Neg_30630	Negative	11.5706	307.191	(6E,8E,10R,12Z)-10-Hydroxy-3-Oxooctadecatrienoic Acid	[M-H2O-H]-	C18H28O4	Fatty Acyls	439336576
Pos_13097	Positive	6.52775	367.152	(8Alpha,9R,12R)-12-Hydroxy-10Alpha,4-(Oxycarbonyl)-15,16-Epoxy-3-Norcleroda-13(16),14-Dien-20-Oic Acid 20,12-Lactone	[M+Na]+	C20H24O5	Delta valerolactones	387848384
Neg_26546	Negative	10.0811	327.217	(9R,10S,12Z)-9,10-Dihydroxy-8-Oxo-12-Octadecenoic Acid	[M-H2O-H]-	C18H32O5	Fatty Acyls	4781932032
Neg_20187	Negative	8.51692	279.124	(E)-2-(Hydroxymethyl)-3-(3-Oxo-5-Propan-2-Yl-4,5,6,7-Tetrahydro-1H-2-Benzofuran-4-Yl)Prop-2-Enoic Acid	[M-H]-	C15H20O5	Terpene lactones	818865408
Neg_15923	Negative	7.34342	179.034	(E)-3-(2,3-Dihydroxyphenyl)-2-Propenoic Acid	[M-H]-	C9H8O4	Cinnamic acids and derivatives	16238646272
Pos_25357	Positive	9.55038	321.11	(E)-3-Phenyl-1-(2, 4, 6-Trimethoxyphenyl)Prop-2-En-1-One	[M+Na]+	C18H18O4	Linear 1,3-diarylpropanoids	268217664
Pos_25636	Positive	9.64785	311.222	(E)-4-[(1R,2S,3S,4R,8As)-2,3,4-Trihydroxy-2,5,5,8A-Tetramethyl-3,4,4A,6,7,8-Hexahydro-1H-Naphthalen-1-Yl]But-3-En-2-One	[M+H]+	C18H30O4	Sesquiterpenoids	675485184
Pos_28186	Positive	10.7052	291.136	(E)-5-(3-Hydroxy-2,3-Dimethyl-2-Bicyclo[2.2.1]Heptanyl)-2-Methylpent-2-Enoic Acid	[M+K]+	C15H24O3	Sesquiterpenoids	807983040
Pos_13452	Positive	6.63917	296.147	(E,Z)-3-(Dibenzo[B,E]Thiepin-11(6H)-Ylidene)-N,N-Dimethylpropan-1-Amine	[M+H]+	C19H21NS	Dibenzothiepins	299902272
Pos_30427	Positive	11.7488	335.222	(Ent-6Alpha,7Alpha)-6,7-Dihydroxy-16-Kauren-19-Oic Acid	[M+Na]+	C20H30O4	Prenol lipids	522270944
Neg_24799	Negative	9.59268	159.102	(R)-2-Hydroxycaprylic Acid	[M-H]-	C8H16O3	Medium-chain fatty acids	766247104
Pos_36719	Positive	13.8181	162.092	(R)-Boschniakine	[M+H]+	C10H11NO	Pyridines and derivatives	330494240
Neg_26715	Negative	10.1368	287.222	(S)-10,16-Dihydroxyhexadecanoic Acid	[M-H]-	C16H32O4	Fatty Acyls	1432958720
Pos_28596	Positive	10.8998	175.112	(S)-11,12,13-Trinor-7-Calamenone	[M+H]+	C12H14O	Tetralins	943592640
Neg_08401	Negative	3.2553	103.04	(S)-3-Hydroxybutyric Acid	[M-H]-	C4H8O3	Hydroxy acids and derivatives	1430617984
Neg_24938	Negative	9.63448	183.102	(S)-Oleuropeic Acid	[M-H2O-H]-	C10H16O3	Prenol lipids	407601280
Neg_32167	Negative	12.2934	295.227	(Z)-13-Oxo-9-Octadecenoic Acid	[M-H]-	C18H32O3	Fatty Acyls	1949242880
Pos_26339	Positive	9.89847	353.23	(Z)-5,8,11-Trihydroxyoctadec-9-Enoic Acid	[M+Na]+	C18H34O5	Long-chain fatty acids	405319136
Neg_28752	Negative	10.8469	325.202	(Z)-5-[(2R,3S,4S)-4-Hydroxy-2-[(E)-3-Hydroxyoct-1-Enyl]Oxan-3-Yl]Pent-3-Enoic Acid	[M-H]-	C18H30O5	Hydroxy acids and derivatives	1184515712
Pos_22705	Positive	8.69997	547.142	[(3S,4R,5S)-5-[(2S,3R,4S,5S,6R)-4,5-Dihydroxy-6-(Hydroxymethyl)-2-(4-Hydroxyphenoxy)Oxan-3-Yl]Oxy-3,4-Dihydroxyoxolan-3-Yl]Methyl 4-Hydroxybenzoate	[M+Na]+	C24H28O13	Glycosyl compounds	229945504
Pos_22689	Positive	8.69997	374.181	[(E)-3-Acetyloxy-7-Hydroxy-6-Methoxy-7-(6-Oxo-2,3-Dihydropyran-2-Yl)Hept-4-En-2-Yl] Acetate	[M+NH4]+	C17H24O8	Tricarboxylic acids and derivatives	207799984
Neg_26228	Negative	9.98342	243.033	[4-(3-Oxobutyl)Phenyl]Oxidanesulfonic Acid	[M-H]-	C10H12O5S	Phenylsulfates	5258140672
Pos_25026	Positive	9.45282	351.108	[4-Acetyloxy-2,5-Dihydroxy-6-(Hydroxymethyl)Oxan-3-Yl] (E)-3-(4-Hydroxyphenyl)Prop-2-Enoate	[M-H2O+H]+	C17H20O9	Hydroxycinnamic acid esters	341895904
Neg_23857	Negative	9.34143	425.182	[5-Formyl-4,8-Dihydroxy-3-(3-Methoxy-3-Oxoprop-1-En-2-Yl)-8A-Methyl-2,3,4,4A,5,6,7,8-Octahydro-1H-Naphthalen-2-Yl] 3,4-Dihydroxy-2-Methylidenebutanoate	[M-H]-	C21H30O9	Eudesmane, isoeudesmane or cycloeudesmane sesquiterpenoids	176650528
Neg_22265	Negative	8.99185	179.071	1-(2,4-Dihydroxyphenyl)-1-Butanone	[M-H]-	C10H12O3	Organooxygen compounds	1144775936
Pos_25209	Positive	9.50853	181.086	1-(2,4-Dimethoxyphenyl)Ethanone	[M+H]+	C10H12O3	Ketones	571209344
Pos_29766	Positive	11.4419	287.104	1(2H)-Naphthalenone, 3,4-Dihydro-2-((4-Methoxyphenyl)Methylene)-, (E)-	[M+Na]+	C18H16O2	Tetralins	240809040
Neg_15585	Negative	7.24558	327.109	1-(4-Hydroxyphenyl)-3-[(2R,3R,4S,5S,6R)-3,4,5-Trihydroxy-6-(Hydroxymethyl)Oxan-2-Yl]Oxypropan-1-One	[M-H]-	C15H20O8	Fatty acyl glycosides	262346944
Pos_09923	Positive	5.37332	159.076	1-(Aminocarbonyl)-L-Proline	[M+H]+	C6H10N2O3	Amino acids and derivatives	668602304
Pos_20153	Positive	8.07282	175.149	1,2,3,4,Tetrahydro-1,5,7-Trimethylnapthalene	[M+H]+	C13H18	Tetralins	2958964480
Pos_14498	Positive	6.95922	217.097	1,2,3,4-Tetrahydro-Beta-Carboline-3-Carboxylic Acid	[M+H]+	C12H12N2O2	Beta carbolines	4667281920
Pos_11493	Positive	6.01188	134.096	1,2,3,4-Tetrahydroquinoline	[M+Na]+	C9H11N	Quinolines and derivatives	253466384
Neg_13600	Negative	6.61845	209.009	1,2,3-Trimethoxy-5-[2-[4-[(3-Methyl-2-Buten-1-Yl)Oxy]Phenyl]Ethyl]-Benzene	[M-H]-	C9H6O6	Carboxylic acids and derivatives	261729424
Pos_12030	Positive	6.1792	109.029	1,2-Benzoquinone	[M+H]+	C6H4O2	Organooxygen compounds	4318022656
Pos_28591	Positive	10.8998	131.086	1,2-Dihydronaphthalene	[M+H-H2O]+	C10H10	Naphthalenes	962689344
Pos_27736	Positive	10.4967	183.117	1,2-Diphenylethane	[M+CH3OH+H]+	C14H14	Stilbenes	665488640
Pos_15895	Positive	7.2652	81.0699	1,3,5-Hexatriene	[M+H]+	C6H8	Unsaturated hydrocarbons	473525792
Neg_30976	Negative	11.7235	371.114	1,3,6,8-Tetrahydroxy-2-(1-Hydroxyhexyl)Anthracene-9,10-Dione	[M-H]-	C20H20O7	Hydroxyanthraquinones	211434016
Pos_20875	Positive	8.21203	517.134	1,3-Dicaffeoylquinic Acid	[M+H]+	C25H24O12	Quinic acids and derivatives	1399629952
Pos_16486	Positive	7.39033	173.081	1,4-Cyclohexanedicarboxylic Acid	[M+H]+	C8H12O4	Dicarboxylic acids and derivatives	755808256
Neg_11881	Negative	6.01982	325.108	1,5-Bis(4-Hydroxy-3-Methoxyphenyl)-1,4-Pentadien-3-One	[M-H]-	C19H18O5	Cinnamic acids and derivatives	224372592
Pos_12544	Positive	6.36057	159.092	1,5-Naphthalenediamine	[M+H]+	C10H10N2	Naphthalenes	608755712
Neg_30355	Negative	11.4593	373.166	1,7-Bis(3,4-Dihydroxyphenyl)Heptan-3-Yl Acetate	[M-H]-	C21H26O6	Linear diarylheptanoids	522544672
Pos_30682	Positive	11.8741	329.175	1,7-Bis(4-Hydroxyphenyl)-5-Methoxyheptan-3-One	[M+H]+	C20H24O4	Curcuminoids	259450784
Pos_23222	Positive	8.86732	371.151	1-[6-(3,3-Dimethyl-2-Oxobutylthio)Purin-9-Yl]-3,3-Dimethylbutan-2-One	[M+Na]+	C17H24N4O2S	6-thiopurines	445559808
Pos_27537	Positive	10.4132	247.133	10,12-Dihydroxy-9-Methyl-4,13-Dimethylene-6-Oxatricyclo[7.4.0.0<3,7>]Tridecan- 5-One	[M+H-H2O]+	C15H20O4	Sesquiterpene lactones	11724713984
Neg_31071	Negative	11.7652	311.222	10-Oxo-13-Hydroxy-11-Octadecenoic Acid	[M-H]-	C18H32O4	Fatty Acyls	5438579712
Pos_30422	Positive	11.7488	193.123	11,12,13-Trinor-1,3,5-Bisabolatrien-10-Oic Acid	[2M+H]+	C12H16O2	Prenol lipids	382733984
Pos_19628	Positive	7.97503	279.123	11,13-Dihydrolactucin	[M+H]+	C15H18O5	Gamma butyrolactones	637073216
Neg_16972	Negative	7.66382	481.244	11-Beta-Hydroxyandrosterone-3-Glucuronide	[M-H]-	C25H38O9	Indoles and derivatives	179738016
Pos_29163	Positive	11.1637	311.222	12(13)Ep-9-Kode	[M+H]+	C18H30O4	Long-chain fatty acids	1888119808
Pos_30016	Positive	11.5675	315.253	12,13-Dihome	[M+H]+	C18H34O4	Long-chain fatty acids	361193152
Pos_28921	Positive	11.0525	289.18	12-Hydroxy-13-(Hydroxymethyl)-3,5,7-Trimethyl-2,4-Tetradecadienedioic Acid	[M-3H2O+H]+	C18H30O6	Long-chain fatty acids	485559680
Pos_15059	Positive	7.08445	227.128	12-Hydroxyjasmonic Acid	[M+H]+	C12H18O4	Jasmonic acids	4935597568
Pos_29403	Positive	11.2748	275.2	12-oxo-PDA	[M-H2O+H]+	C18H28O3	Prostaglandins and related compounds	1573773696
Pos_32050	Positive	12.4329	295.227	13-OxoODE	[M+H]+	C18H30O3	Lineolic acids and derivatives	2525840896
Pos_31203	Positive	12.125	174.076	1-Aminocyclopentane-1,3-Dicarboxylic Acid	[M+H]+	C7H11NO4	Carboxylic acids and derivatives	846258368
Pos_12590	Positive	6.37443	102.055	1-Aminocyclopropane-1-Carboxylic Acid	[M+H]+	C4H7NO2	Amino acids and derivatives	1958727296
Pos_18053	Positive	7.69645	124.076	1-Ethyl-1H-Pyrrole-2-Carboxaldehyde	[M+H]+	C7H9NO	Organooxygen compounds	661172288
Pos_05168	Positive	1.75458	112.051	1H-Imidazole-4-Carboxamide	[M+H]+	C4H5N3O	Carboxylic acids and derivatives	2014064896
Neg_14708	Negative	6.98093	94.0293	1H-Pyrrole-2-Carboxaldehyde	[M-H]-	C5H5NO	Organooxygen compounds	588115520
Pos_13992	Positive	6.82013	240.087	1H-Pyrrole-3-Propanoic Acid, 5-Acetyl-4-(Carboxymethyl)-	[M+H]+	C11H13NO5	Ketones	362556032
Pos_05381	Positive	1.8101	188.128	1-Hydroxy-2,2,5,5-Tetramethylpyrrolidine-3-Carboxylic Acid	[M+CH3OH+H]+	C9H17NO3	Pyrrolidines	4335035392
Pos_12253	Positive	6.26282	139.087	1-Methyl-1,2-Dihydropyridine-3-Carboxamide	[M+NH4]+	C7H10N2O	Pyridines and derivatives	283113664
Pos_31726	Positive	12.3208	286.217	1-Methyl-2-Nonyl-1,4-Dihydroquinolin-4-One	[M+H]+	C19H27NO	Hydroquinolones	1268563328
Pos_27079	Positive	10.2186	201.164	1-Methyl-4-(6-Methylhept-5-En-2-Yl)-2,3-Dioxabicyclo[2.2.2]Oct-5-Ene	[M-2H2O+H]+	C15H24O2	1,2-dioxanes	10600178688
Pos_28592	Positive	10.8998	149.132	1-Methyl-4-Isobutylbenzene	[M+NH4]+	C11H16	Benzene and substituted derivatives	1109685248
Pos_28230	Positive	10.733	203.179	1-Methyl-4-Methylidene-7-(Propan-2-Yl)-1,2,3,3A,4,5,6,8A-Octahydroazulen-1-Ol	[M-H2O+H]+	C15H24O	Guaianes	10677040128
Pos_04147	Positive	1.36532	282.12	1-Methyladenosine	[M+H]+	C11H15N5O4	Purine nucleosides	265502384
Pos_14703	Positive	7.00098	345.132	1-Methyl-N-(2-(Nicotinamido)Ethyl)-1H-Indole-3-Carboxamide	[M+Na]+	C18H18N4O2	Indolecarboxamides and derivatives	275277152
Neg_10897	Negative	5.36712	331.067	1-O-Galloylfructose	[M-H]-	C13H16O10	Benzene and substituted derivatives	1563052800
Pos_28594	Positive	10.8998	159.117	1-Phenyl-1-Cyclohexene	[M+H]+	C12H14	Benzene and substituted derivatives	19614935040
Pos_25942	Positive	9.75927	123.08	1-Phenylethanol	[M+H]+	C8H10O	Benzene and substituted derivatives	1081957120
Pos_13140	Positive	6.5417	128.071	1-Piperideine-2-Carboxylic Acid	[M+NH4]+	C6H9NO2	Pyridines and derivatives	2094418560
Pos_13633	Positive	6.69483	114.092	1-Piperidinecarboxaldehyde	[M+H]+	C6H11NO	Piperidines	3752643840
Pos_11768	Positive	6.0958	100.076	1-Pyrrolidinecarboxaldehyde	[M+H]+	C5H9NO	Pyrrolidines	1776598656
Neg_28050	Negative	10.5963	250.072	2-((3-Carboxypropyl)Carbamoyl)Benzoic Acid	[M-H]-	C12H13NO5	Carboxylic acids and derivatives	740638208
Neg_20247	Negative	8.53085	471.13	2-({6-O-[(2E)-3-(4-Hydroxyphenyl)-2-Propenoyl]-Beta-D-Glucopyranosyl}Oxy)-3-Phenylacrylic Acid	[M-H]-	C24H24O10	Fatty acyl glycosides	389344928
Pos_13356	Positive	6.61137	161.107	2-(1H-Indol-2-Yl)Ethanamine	[M+H]+	C10H12N2	Indoles and derivatives	496139168
Pos_32530	Positive	12.5877	361.235	2-(2-Hydroxybut-3-En-2-Yl)-3A,6,6,9A-Tetramethyl-2,4,5,5A,7,8,9,9B-Octahydro-1H-Benzo[E][1]Benzofuran-4,5-Diol	[M+Na]+	C20H34O4	Naphthofurans	238152336
Pos_15842	Positive	7.25123	347.162	2-(3-(8-Hydroxyoctyl)Phenoxy)-2-Methylpropanoic Acid	[M+K]+	C18H28O4	Phenoxyacetic acid derivatives	226858144
Neg_17473	Negative	7.81705	230.103	2-(3-Carboxypropanoylamino)Hexanoic Acid	[M-H]-	C10H17NO5	Amino acids and derivatives	269515104
Pos_23756	Positive	9.02075	207.138	2-(3-Pentylphenyl)Acetic Acid	[M+NH4]+	C13H18O2	Benzene and substituted derivatives	1412331904
Neg_19454	Negative	8.33472	445.172	2-(4-Methoxyphenyl)Ethyl 6-O-A-L-Arabinopyranosyl-B-D-Glucopyranoside	[M-H]-	C20H30O11	Glycosyl compounds	488934944
Pos_18497	Positive	7.78005	167.107	2-(4-Methoxyphenyl)Propan-2-Ol	[M+H]+	C10H14O2	Benzene and substituted derivatives	1668325760
Pos_15949	Positive	7.27903	283.105	2-(4-Oxoquinazolin-3(4H)-Yl)Ethyl Isobutyrate	[M+Na]+	C14H16N2O3	Quinazolines	2250630144
Pos_15528	Positive	7.18163	251.139	2-(Acetylamino)-N-Benzyl-3-Methoxypropanamide	[M+H]+	C13H18N2O3	Amino acids and derivatives	248204160
Pos_12753	Positive	6.43027	190.123	2-(Dimethylaminomethyl)-1-Phenyl-Prop-2-En-1-One	[M+H-H2O]+	C12H15NO	Benzene and substituted derivatives	340975200
Pos_21648	Positive	8.4212	230.082	2-(Fluoromethyl)-3-(3,4-Dihydroxyphenyl)Alanine	[M+H-H2O]+	C10H12FNO4	Phenylpropanoic acids	386941664
Pos_12355	Positive	6.2908	216.086	2-(Methyl(2H-Pyrazolo[3,4-D]Pyrimidin-4-Yl)Amino)Ethanol	[M+Na]+	C8H11N5O	Pyrazolo[3,4-d]pyrimidines	541763840
Neg_16806	Negative	7.622	157.051	2-(Methylethylidene)Butanedioic Acid	[M-H]-	C7H10O4	Branched fatty acids	8169778688
Pos_28765	Positive	10.9692	158.154	2,2,6,6-Tetramethylpiperidin-1-Ol	[M+Na]+	C9H19NO	Piperidines	17054791680
Pos_28496	Positive	10.8581	181.123	2,2,7,7-Tetramethyl-1,6-Dioxaspiro[4.4]Nona-3,8-Diene	[M+H]+	C11H16O2	Organooxygen compounds	4020322048
Neg_17466	Negative	7.81705	159.066	2,2-Dimethylglutaric Acid	[M-H]-	C7H12O4	Fatty Acyls	2555600896
Neg_10321	Negative	4.85318	145.05	2,2-Dimethylsuccinic Acid	[M-H]-	C6H10O4	Fatty Acyls	5461886464
Pos_21472	Positive	8.37948	137.096	2,3,5-Trimethylphenol	[M+H]+	C9H12O	Phenols	2135407488
Neg_05963	Negative	1.5608	328.045	2',3'-Cyclic AMP	[M-H]-	C10H12N5O6P	2',3'-cyclic purine nucleotides	697302080
Pos_21803	Positive	8.46307	136.076	2,3-Dihydro-1H-Pyrrolizine-5-Carboxaldehyde	[M+H]+	C8H9NO	Pyrrolizines	432719808
Pos_10795	Positive	5.87228	150.092	2,3-Dihydro-6-Methyl-1H-Pyrrolizine-5-Carboxaldehyde	[M+H]+	C9H11NO	Pyrrolizines	2460203520
Pos_08212	Positive	3.69703	121.065	2,3-Dihydrobenzofuran	[M+H]+	C8H8O	Coumarans	2304326400
Pos_12894	Positive	6.47202	213.076	2,3-Dihydroxy-1-(4-Hydroxy-3-Methoxyphenyl)Propan-1-One	[M+H]+	C10H12O5	Ketones	825985984
Pos_25580	Positive	9.63393	125.097	2,3-Dimethyl-2-Cyclohexen-1-One	[M+H-H2O]+	C8H12O	Organooxygen compounds	2608906496
Neg_12339	Negative	6.1729	141.019	2,3-Methylenesuccinic Acid	[M-H]-	C6H6O4	Fatty Acyls	395877696
Neg_23801	Negative	9.3275	301.035	2',4',5,7,8-Pentahydroxyisoflavone	[M-H]-	C15H10O7	Isoflavonoids	628661504
Neg_09799	Negative	4.38033	169.014	2,4,6-Trihydroxybenzoic Acid	[M-H]-	C7H6O5	Benzene and substituted derivatives	1821614720
Neg_27086	Negative	10.2483	257.082	2',4',6'-Trihydroxydihydrochalcone	[M-H]-	C15H14O4	2'-Hydroxy-dihydrochalcones	2847558656
Pos_16631	Positive	7.41825	227.092	2,4,6-Trimethoxyphenyl Acetate	[M+H]+	C11H14O5	Phenol esters	1753182720
Pos_06976	Positive	2.62877	112.039	2,4-Dihydroxypyridine	[M+H]+	C5H5NO2	Pyridines and derivatives	1321443584
Pos_30094	Positive	11.6094	279.193	2,6,10-Trimethyldodeca-6,11-Diene-2,3,10-Triol	[M+Na]+	C15H28O3	Sesquiterpenoids	1676649856
Neg_18456	Negative	8.06887	153.019	2,6-Dihydroxybenzoate	[M-H]-	C7H6O4	Hydroxybenzoic acid derivatives	17063892992
Pos_28069	Positive	10.6495	195.102	2,6-Dimethoxy-4-(1-Propenyl)Phenol	[M+H]+	C11H14O3	Phenols	1424401152
Pos_25762	Positive	9.68962	221.154	2,6-Di-T-Butyl-P-Benzoquinone	[M+H]+	C14H20O2	Monocyclic monoterpenoids	1059846848
Neg_31561	Negative	12.0154	249.15	2-[(1S,2S,4Ar,8As)-1-Hydroxy-4A-Methyl-8-Methylidene-1,2,3,4,5,6,7,8A-Octahydronaphthalen-2-Yl]Prop-2-Enoic Acid	[M-H]-	C15H22O3	Eudesmane, isoeudesmane or cycloeudesmane sesquiterpenoids	2091912192
Neg_05033	Negative	1.25448	421.114	2-[[(2R,3S)-2-(3,4-Dihydroxyphenyl)-3,5-Dihydroxy-3,4-Dihydro-2H-Chromen-7-Yl]Oxy]Oxane-3,4,5-Triol	[M-H]-	C20H22O10	Flavonoid O-glycosides	125237728
Pos_18977	Positive	7.86367	484.2	2-[1-(4-Methoxyphenyl)(1,2,3,4-Tetrahydrobeta-Carbolin-2-Yl)]-N-Naphthylacetam Ide	[M+Na]+	C30H27N3O2	Harmala alkaloids	109155096
Neg_20702	Negative	8.61467	373.187	2-[2-[(Z)-Pent-2-Enyl]-3-[3,4,5-Trihydroxy-6-(Hydroxymethyl)Oxan-2-Yl]Oxycyclopentyl]Acetic Acid	[M-H]-	C18H30O8	Fatty acyl glycosides	325953280
Pos_26601	Positive	10.0098	575.134	2-{1-[(4-Chlorophenyl)Carbonyl]-5-Methoxy-2-Methylindol-3-Yl}-N-(2-Methoxybenz O[3,4-B]Benzo[D]Furan-3-Yl)Acetamide	[M+Na]+	C32H25ClN2O5	Benzoylindoles	1440723200
Neg_18328	Negative	8.02688	206.082	2-Acetamido-4-Methylphenyl Acetate	[M-H]-	C11H13NO3	Phenol esters	1910897792
Pos_04953	Positive	1.68498	200.092	2-Acetyl-1,5,6,7-Tetrahydro-6-Hydroxy-7-(Hydroxymethyl)-4H-Azepine-4-One	[M+CH3OH+H]+	C9H13NO4	Azepines	524755328
Neg_13556	Negative	6.60458	123.045	2-Acetyl-3-Methylfuran	[M-H]-	C7H8O2	Organooxygen compounds	1043834816
Pos_14139	Positive	6.86188	190.144	2-Amino-3-Hydroxynonanoic Acid	[M+H]+	C9H19NO3	Amino acids and derivatives	298922784
Pos_21288	Positive	8.32367	199.098	2-Amino-3-Methylimidazo(4,5-F)Quinoline	[M+H]+	C11H10N4	Quinolines and derivatives	956317248
Pos_13719	Positive	6.72267	438.214	2-Amino-7-[(17Beta)-3,4,17-Trihydroxyestra-1,3,5(10)-Trien-1-Yl]-3,7-Dihydro-6H-Purin-6-One	[M+H]+	C23H27N5O4	Estrogens and derivatives	714203840
Pos_01735	Positive	1.03673	151.032	2-Aminobenzothiazole	[M+H]+	C7H6N2S	Benzothiazoles	1890719104
Neg_08894	Negative	3.64413	184.062	2-Aminobicyclo[3.1.0]Hexane-2,6-Dicarboxylic Acid	[M-H]-	C8H11NO4	Carboxylic acids and derivatives	1573136256
Pos_35002	Positive	13.3326	326.305	2-Aminoethyl Oleate	[M+H-H2O]+	C20H39NO2	Fatty Acyls	101939624
Pos_10540	Positive	5.83052	136.062	2-Aminopurine	[M+H-H2O]+	C5H5N5	Imidazopyrimidines	4950781952
Pos_21483	Positive	8.37948	371.206	2-Butanone, 4-[3-(Beta-D-Glucopyranosyloxy)-4-Hydroxy-2,6,6-Trimethyl-1-Cyclohexen-1-Yl]-	[M-H2O+H]+	C19H32O8	Terpene glycosides	432846464
Pos_23506	Positive	8.95102	341.138	2-Butenoic Acid, 2-Methyl-, (3Ar,4R,5R,9As,9Br)-2,3,3A,4,5,7,9A,9B-Octahydro-4-Hydroxy-6,9-Dimethyl-3-Methylene-2,7-Dioxoazuleno[4,5-B]Furan-5-Yl Ester, (2Z)-	[M-H2O+H]+	C20H22O6	Fatty acid esters	975382208
Pos_19619	Positive	7.97503	189.128	2-Butyl-3-Phenyl-2-Propen-1-Al	[M+H]+	C13H16O	Cinnamaldehydes	1985737728
Neg_20984	Negative	8.68453	241.144	2-Carboxy-4-Dodecanolide	[M-H]-	C13H22O4	Lactones	207841760
Neg_34146	Negative	13.3895	83.0251	2-Cyanoacetamide	[M-H2O-H]-	C3H4N2O	Carboxylic acids and derivatives	483510304
Pos_27073	Positive	10.2186	83.0491	2-Cyclopenten-1-One	[M+H-H2O]+	C5H6O	Organooxygen compounds	507660544
Neg_17408	Negative	7.80312	131.071	2-Ethyl-2-Hydroxybutyric Acid	[M-H]-	C6H12O3	Fatty Acyls	7935324160
Pos_04904	Positive	1.67103	160.133	2-Ethyl-3-Hydroxy-2,4,4-Trimethyloxazolidine	[M+H]+	C8H17NO2	Azolidines	799094656
Pos_18560	Positive	7.79395	126.092	2-Ethyl-5-Imino-1-Cyclopenten-1-Ol	[M+H-H2O]+	C7H11NO	Organonitrogen compounds	1192656768
Neg_18235	Negative	7.9989	201.113	2-Ethylsuberic Acid	[M-H]-	C10H18O4	Fatty Acyls	521427552
Pos_09016	Positive	4.34827	99.0446	2-Furanmethanol	[M+H-H2O]+	C5H6O2	Heteroaromatic compounds	1720222848
Pos_10654	Positive	5.84447	342.155	2H-[1,6]Dioxacycloundecino[2,3,4-Gh]Pyrrolizine-2,6(3H)-Dione, 4,5,8,10,12,13,13A,13B-Octahydro-3,4-Dihydroxy-3,4,5-Trimethyl-, 11-Oxide	[M+H]+	C16H23NO7	Pyrrolizines	775910336
Neg_08325	Negative	3.19978	161.045	2-Hydroxy-2-Ethylsuccinic Acid	[M-H]-	C6H10O5	Fatty Acyls	20934752256
Pos_17079	Positive	7.50168	197.081	2-Hydroxy-3-(4-Methoxyphenyl)Propanoic Acid	[M+H]+	C10H12O4	Phenylpropanoic acids	608970880
Pos_06520	Positive	2.33728	124.04	2-Hydroxy-4-Imino-2,5-Cyclohexadienone	[M+H]+	C6H5NO2	Organonitrogen compounds	3048749312
Neg_19992	Negative	8.47498	237.113	2-Hydroxy-4-Methoxy-6-Pentyl-Benzoesaeure	[M-H]-	C13H18O4	Methoxybenzoic acids and derivatives	549320000
Neg_13063	Negative	6.42375	261.007	2-Hydroxy-4-Methoxyacetophenone 5-Sulfate	[M-H2O-H]-	C9H10O7S	Organooxygen compounds	236490688
Pos_20926	Positive	8.22605	137.06	2-Hydroxy-4-Methylbenzaldehyde	[M+H]+	C8H8O2	Organooxygen compounds	508636384
Pos_12704	Positive	6.41642	196.061	2-Hydroxy-7-Methoxy-2H-1,4-Benzoxazin-3(4H)-One	[M+H]+	C9H9NO4	Benzoxazines	322544672
Neg_34580	Negative	13.5562	135.045	2'-Hydroxyacetophenone	[M-H2O-H]-	C8H8O2	Organooxygen compounds	688146240
Neg_23107	Negative	9.18782	215.002	2-Hydroxyacetophenone Sulfate	[M-H]-	C8H8O5S	Ketones	220849888
Neg_34991	Negative	13.8195	87.0082	2-Hydroxyacrylic Acid	[M-H]-	C3H4O3	Carboxylic acids and derivatives	1224724480
Pos_24719	Positive	9.35537	309.096	2-Hydroxycinnamoyl-Beta-D-Glucopyranoside	[M-H2O+H]+	C15H18O8	Hydroxycinnamic acid esters	2654475264
Pos_30068	Positive	11.5815	463.157	2-Hydroxycyclohexyl 2-O-[(2E)-3-(3,4-Dihydroxyphenyl)-2-Propenoyl]-Beta-D-Glucopyranoside	[M+Na]+	C21H28O10	Coumaric acids and derivatives	293333728
Neg_18955	Negative	8.20882	217.108	2-Hydroxydecanedioic Acid	[M-H]-	C10H18O5	Hydroxy acids and derivatives	751228096
Pos_20380	Positive	8.1145	449.108	2'-Hydroxygenistein 7-O-Glucoside	[M+H]+	C21H20O11	Isoflavonoid O-glycosides	1353502848
Neg_06563	Negative	1.936	147.03	2-Hydroxyglutaric Acid	[M-H]-	C5H8O5	Short-chain hydroxy acids and derivatives	2295578624
Neg_31564	Negative	12.0154	293.212	2-Hydroxylinolenic Acid	[M-H]-	C18H30O3	Fatty Acyls	7250044416
Pos_04784	Positive	1.6294	96.0444	2-Hydroxypyridine	[M+H]+	C5H5NO	Pyridinones	3484128256
Neg_09686	Negative	4.25522	110.025	2-Hydroxypyridine 1-Oxide	[M-H2O-H]-	C5H5NO2	Pyridines and derivatives	675786752
Neg_13379	Negative	6.54897	117.056	2-Hydroxyvaleric Acid	[M-H]-	C5H10O3	Fatty Acyls	4705257984
Neg_14754	Negative	6.99483	175.061	2-Isopropylmalic Acid	[M-H]-	C7H12O5	Hydroxy fatty acids	24540762112
Pos_25644	Positive	9.64785	437.196	2-Methoxy-6-[(Triphenylmethoxy)Methyl]-2H-3,4,5,6-Tetrahydropyran-3,4,5-Triol	[M+H]+	C26H28O6	Triphenyl compounds	475618496
Pos_11510	Positive	6.01188	289.092	2-Methyl-3-[(2S,3R,4S,5S,6R)-3,4,5-Trihydroxy-6-(Hydroxymethyl)Oxan-2-Yl]Oxypyran-4-One	[M+H]+	C12H16O8	Glycosyl compounds	1986584192
Neg_31595	Negative	12.0294	101.024	2-Methyl-3-Oxopropanoic Acid	[M-H]-	C4H6O3	Organooxygen compounds	6430399488
Neg_05684	Negative	1.42178	159.029	2-Methyl-4-Oxopentanedioic Acid	[M-H]-	C6H8O5	Keto acids and derivatives	1049756544
Neg_18659	Negative	8.12492	119.05	2-Methylbenzaldehyde	[M-H]-	C8H8O	Benzene and substituted derivatives	1492389760
Pos_25834	Positive	9.71752	288.196	2-Methylbenzoic Acid (Octahydro-1H-Quinolizine-1-Yl)Methyl Ester	[M+H]+	C18H25NO2	Lupinine-type alkaloids	705364544
Pos_09780	Positive	5.22097	88.1126	2-Methylbutylamine	[M+H]+	C5H13N	Organonitrogen compounds	7666010624
Neg_10017	Negative	4.60292	205.035	2-Methylcitric Acid	[M-H]-	C7H10O7	Tricarboxylic acids and derivatives	472986688
Pos_01807	Positive	1.05072	169.047	2-Methylglutarate	[M+Na]+	C6H10O4	Methyl-branched fatty acids	166673520
Pos_27770	Positive	10.5105	111.042	2-Methylpropanoic Acid	[M+Na]+	C4H8O2	Carboxylic acids	699626240
Pos_23098	Positive	8.82555	286.201	2-Octenoylcarnitine	[M+H]+	C15H27NO4	Acyl carnitines	216138016
Neg_13349	Negative	6.53508	401.109	2-O-Glucosyloxy-4-Methoxycinnamic Acid	[M+FA-H]-	C16H20O9	Glycosyl compounds	237774208
Pos_10947	Positive	5.9003	282.12	2'-O-Methyladenosine	[M+H]+	C11H15N5O4	Purine nucleosides	1403701504
Pos_07304	Positive	2.86457	87.044	2-Oxo-Butanal	[M+H]+	C4H6O2	Organooxygen compounds	847081344
Pos_28881	Positive	11.0386	135.117	2-Pinene Oxide	[M+H-H2O]+	C10H16O	Bicyclic monoterpenoids	1083297920
Pos_07400	Positive	2.94795	166.072	2-Pyrazinoylguanidine	[M+Na]+	C6H7N5O	Diazines	674899456
Pos_08458	Positive	3.891	86.0601	2-Pyrrolidone	[M+H]+	C4H7NO	Pyrrolidine-2-ones	24918769664
Pos_19364	Positive	7.93328	223.06	2-Succinylbenzoate	[M+H]+	C11H10O5	Organooxygen compounds	489292288
Neg_18083	Negative	7.95715	121.029	3-(2-Furanyl)-2-Propenal	[M-H]-	C7H6O2	Heteroaromatic compounds	3782645504
Pos_21345	Positive	8.33763	195.066	3-(2-Hydroxy-3-Methoxyphenyl)-2-Propenoic Acid	[M+H]+	C10H10O4	Cinnamic acids and derivatives	1656615680
Pos_28597	Positive	10.8998	177.127	3-(2-Methylpropyl)-3A,4,5,6-Tetrahydro-2-Benzofuran-1(3H)-One	[M+H-H2O]+	C12H18O2	Isobenzofurans	5665593856
Pos_10803	Positive	5.87228	195.081	3-(4-Oxopentyl)-8-Hydroxy-3,4-Dihydro-1H-2-Benzopyran-1-One	[M-3H2O+H]+	C14H16O4	2-benzopyrans	367320768
Neg_16965	Negative	7.66382	371.098	3-(Benzoyloxy)-2-Hydroxypropyl Beta-D-Glucopyranosiduronic Acid	[M-H]-	C16H20O10	Sugar acids and derivatives	347856896
Pos_22472	Positive	8.63028	609.181	3-(Beta-D-Glucopyranosyloxy)-7-(Alpha-L-Rhamnopyranosyloxy)-5-Hydroxy-4'-Methoxyflavone	[M+H]+	C28H32O15	Flavonoid O-glycosides	327304576
Pos_06398	Positive	2.2541	127.039	3-(Hydroxymethyl)Furan-2-Carbaldehyde	[M+H]+	C6H6O3	Organooxygen compounds	3464114176
Pos_18144	Positive	7.7104	433.149	3,3',4',5,6,7,8-Heptamethoxyflavone	[M+H]+	C22H24O9	8-O-methylated flavonoids	139783504
Pos_18219	Positive	7.72425	381.131	3,4,2',4',6'-Pentamethoxychalcone	[M+Na]+	C20H22O6	Linear 1,3-diarylpropanoids	551526080
Neg_15117	Negative	7.12017	477.161	3,4,5-Trimethoxyphenyl 6-O-Apiofuranosylglucopyranoside	[M-H]-	C20H30O13	Glycosyl compounds	203198048
Pos_20854	Positive	8.21203	149.097	3,4,5-Trimethylbenzaldehyde	[M+NH4]+	C10H12O	Benzene and substituted derivatives	944437504
Neg_12975	Negative	6.39567	153.019	3,4-Dihydroxybenzoate	[M-H]-	C7H6O4	Hydroxybenzoic acid derivatives	9157702656
Pos_03976	Positive	1.28165	383.113	3,4-Dimethoxyphenyl 4-(3-Chlorophenyl)Piperazinyl Ketone	[M+Na]+	C19H21ClN2O3	Phenylpiperazines	291781696
Neg_32446	Negative	12.4185	293.212	3,4-Dimethyl-5-Propyl-2-Furannonanoic Acid	[M-H]-	C18H30O3	Fatty Acyls	604172544
Neg_19398	Negative	8.32068	415.197	3,5,5-Trimethyl-4-[3-[3,4,5-Trihydroxy-6-(Hydroxymethyl)Oxan-2-Yl]Oxybut-1-Enyl]Cyclohex-2-En-1-One	[M+FA-H]-	C19H30O7	Fatty acyl glycosides	408135520
Pos_08550	Positive	3.96033	346.055	3',5'-Cyclic GMP	[M+H]+	C10H12N5O7P	3',5'-cyclic purine nucleotides	2511822592
Pos_17866	Positive	7.6548	169.05	3,5-Dihydroxy-4-Methoxybenzaldehyde	[M+H]+	C8H8O4	Phenols	2165503232
Pos_14298	Positive	6.90365	141.055	3,5-Dihydroxyanisole	[M+CH3OH+H]+	C7H8O3	Phenols	580292224
Neg_16172	Negative	7.39922	258.991	3,5-Dihydroxycinnamic Acid Sulfate	[M-H]-	C9H8O7S	Cinnamic acids and derivatives	397536512
Neg_11644	Negative	5.978	182.046	3,5-Dihydroxyphenylglycine	[M-H]-	C8H9NO4	Carboxylic acids and derivatives	699221888
Pos_22550	Positive	8.65803	223.133	3,5-Diisopropylsalicylic Acid	[M+H]+	C13H18O3	Benzene and substituted derivatives	1679090816
Pos_14300	Positive	6.90365	199.096	3,5-Dimethyl-7-Oxo-6-Oxabicyclo[3.2.1]Octane-2-Carboxylic Acid	[M+H]+	C10H14O4	Gamma butyrolactones	338480320
Pos_11970	Positive	6.15145	122.096	3,5-Dimethylaniline	[M+NH4]+	C8H11N	Benzene and substituted derivatives	4020737024
Pos_12112	Positive	6.20722	291.136	3,6-Diphenylcyclohexan-1,2-Diol	[M+Na]+	C18H20O2	Secondary alcohols	1407016704
Pos_19741	Positive	7.98898	625.176	3-[(2S,3R,4S,5S,6R)-4,5-Dihydroxy-6-(Hydroxymethyl)-3-[(2S,3R,4S,5R,6R)-3,4,5-Trihydroxy-6-(Hydroxymethyl)Oxan-2-Yl]Oxyoxan-2-Yl]Oxy-5-Hydroxy-2-(4-Hydroxyphenyl)-7-Methoxychromen-4-One	[M+H]+	C28H32O16	Flavonoid O-glycosides	113024200
Pos_05378	Positive	1.8101	168.066	3Alpha,4,7,7Alpha-Tetrahydro-4-Hydroxy-1H-Isoindole-1,3(2H)-Dione	[2M+H]+	C8H9NO3	Isoindoles and derivatives	1176593280
Neg_28954	Negative	10.9166	251.128	3Alpha-Hydroxyoreadone	[M-H]-	C14H20O4	Naphthofurans	637569664
Pos_04947	Positive	1.68498	118.086	3-Amino-2,2-Dimethylpropanoic Acid	[M+CH3OH+H]+	C5H11NO2	Carboxylic acids and derivatives	55820976128
Neg_15251	Negative	7.16193	152.035	3-Amino-5-Hydroxybenzoate	[M-H]-	C7H7NO3	Hydroxybenzoic acid derivatives	447896704
Pos_06952	Positive	2.6149	154.097	3-Amino-6,7,8,8A-Tetrahydroimidazo[1,5-A]Pyridin-1(5H)-One	[M+H]+	C7H11N3O	Imidazopyridinones	1609115136
Pos_04897	Positive	1.67103	126.055	3-Aminobenzene-1,2-Diol	[M+H]+	C6H7NO2	Phenols	4427230208
Pos_06737	Positive	2.46217	123.055	3-Aminopicolinaldehyde	[M+NH4]+	C6H6N2O	Pyridines and derivatives	15350685696
Pos_04396	Positive	1.46265	144.102	3Beta,6Beta-Dihydroxynortropane	[M+NH4]+	C7H13NO2	Tropane alkaloids	21281595392
Neg_17363	Negative	7.78917	239.093	3-Carboxy-4-Methyl-5-Propyl-2-Furanpropionic Acid	[M-H]-	C12H16O5	Heterocyclic fatty acids	760706944
Neg_11867	Negative	6.01982	189.04	3-Dehydroquinic Acid	[M-H]-	C7H10O6	Hydroxy acids and derivatives	885819648
Neg_12556	Negative	6.2425	171.03	3-Dehydroshikimate	[M-H]-	C7H8O5	Ketones	547411648
Pos_13602	Positive	6.68097	156.102	3-Ethyl-5-Hydroxy-4,5-Dimethyl-Pyrrolin-2-One	[M+NH4]+	C8H13NO2	Pyrrolines	539393536
Pos_34801	Positive	13.3045	108.081	3-Ethylpyridine	[M+H]+	C7H9N	Pyridines and derivatives	242590768
Neg_19142	Negative	8.26487	203.083	3H-Indole-3-Propanoic Acid,A-Amino-	[M-H]-	C11H12N2O2	Indoles and derivatives	240735568
Neg_08848	Negative	3.61628	111.008	3-Hydroxy-2H-Pyran-2-One	[M-H]-	C5H4O3	Pyrans	703251648
Neg_14363	Negative	6.85538	196.025	3-Hydroxy-2-Methylpyridine-4,5-Dicarboxylate	[M-H]-	C8H7NO5	Pyridines and derivatives	521770368
Pos_27651	Positive	10.455	303.123	3'-Hydroxy-3,4,5,4'-Tetramethoxystilbene	[M+H]+	C17H18O5	Stilbenes	480502304
Pos_31175	Positive	12.111	343.188	3-Hydroxy-4-(Succin-2-Yl)-Caryolane Delta-Lactone	[M+Na]+	C19H28O4	Delta valerolactones	1617113984
Neg_17639	Negative	7.859	403.161	3-Hydroxy-4,9-Dimethyl-10-Oxo-10-[3,4,5-Trihydroxy-6-(Hydroxymethyl)Oxan-2-Yl]Oxydeca-6,8-Dienoic Acid	[M-H]-	C18H28O10	Fatty acyl hexosides	320902144
Pos_18718	Positive	7.82182	323.089	3-Hydroxy-9,10-Dimethoxypterocarpan	[M+Na]+	C17H16O5	Pterocarpans	373941984
Pos_10700	Positive	5.85835	145.05	3-Hydroxyadipic Acid 3,6-Lactone	[2M+H]+	C6H8O4	Lactones	45816410112
Neg_23527	Negative	9.27173	137.024	3-Hydroxybenzoate	[M-H]-	C7H6O3	Hydroxybenzoic acid derivatives	23255883776
Pos_20844	Positive	8.21203	107.049	3-Hydroxybenzyl Alcohol	[M+H-H2O]+	C7H8O2	Benzyl alcohols	525402816
Neg_28261	Negative	10.6659	187.133	3-Hydroxycapric Acid	[M-H]-	C10H20O3	Hydroxy acids and derivatives	402480224
Neg_33744	Negative	13.1675	271.227	3-Hydroxyhexadecanoic Acid	[M-H]-	C16H32O3	Fatty Acyls	1203373056
Neg_32444	Negative	12.4185	243.196	3-Hydroxymyristic Acid	[M-H]-	C14H28O3	Fatty Acyls	143208208
Neg_28953	Negative	10.9166	242.14	3-Hydroxy-N-(2-Oxotetrahydrofuran-3-Yl)Octanamide	[M-H]-	C12H21NO4	Amino acids and derivatives	357565856
Neg_07061	Negative	2.2832	138.019	3-Hydroxypicolinic Acid	[M-H]-	C6H5NO3	Pyridines and derivatives	1273098880
Pos_08148	Positive	3.62777	300.121	3-Methoxy-4-(2-Oxo-2-Piperidylethoxy)Benzaldehyde	[M+Na]+	C15H19NO4	N-acylpiperidines	1233794688
Neg_17538	Negative	7.84503	195.029	3-Methoxy-4,5-Methylenedioxybenzoic Acid	[M-H]-	C9H8O5	Benzene and substituted derivatives	695277312
Pos_12987	Positive	6.4999	256.133	3-Methoxy-6-Methyl-6,7-Dihydro-5H-Dibenzo[C,E]Azepin-2-Ol	[M+H]+	C16H17NO2	Benzazepines	1096252416
Neg_17237	Negative	7.74737	129.056	3-Methyl-2-Oxovaleric Acid	[M-H]-	C6H10O3	Short-chain keto acids and derivatives	3333326592
Pos_32002	Positive	12.4189	161.097	3-Methyl-4-Phenyl-3-Buten-2-One	[M+H-H2O]+	C11H12O	Benzene and substituted derivatives	250919392
Pos_04902	Positive	1.67103	150.077	3-Methyladenine	[M+H]+	C6H7N5	6-aminopurines	247418848
Neg_26484	Negative	10.0671	201.113	3-Methylazelaic Acid	[M-H]-	C10H18O4	Fatty Acyls	372465856
Neg_05423	Negative	1.35207	147.029	3-Methylmalate(2-)	[M-H]-	C5H8O5	Fatty Acyls	674554176
Neg_18375	Negative	8.0408	173.081	3-Methylpimelic Acid	[M-H]-	C8H14O4	Fatty Acyls	1449799936
Neg_26283	Negative	9.99733	315.051	3-Methylquercetin	[M-H]-	C16H12O7	Flavonols	689624832
Pos_14239	Positive	6.8897	167.07	3-Methyltetrahydrophthalic Anhydride	[M+CH3OH+H]+	C9H10O3	Isobenzofurans	700428352
Neg_05280	Negative	1.31042	311.098	3-O-Beta-D-Galactopyranosyl-L-Arabinose	[M-H]-	C11H20O10	Organooxygen compounds	689954368
Pos_10469	Positive	5.8027	258.108	3'-O-Methylcytidine	[M+H]+	C10H15N3O5	Pyrimidine nucleosides	192366080
Neg_24502	Negative	9.50908	315.051	3-O-Methylquercetin	[M-H]-	C16H12O7	3-O-methylated flavonoids	218102560
Pos_27054	Positive	10.2047	469.331	3-Oxoglycyrrhetinic Acid	[M+H]+	C30H44O4	Triterpenoids	298281408
Neg_33602	Negative	13.0703	297.243	3-Oxooctadecanoic Acid	[M-H]-	C18H34O3	Fatty Acyls	218253264
Neg_19387	Negative	8.32068	165.056	3-Phenyllactic Acid	[M-H]-	C9H10O3	Phenylpropanoic acids	933452864
Pos_04894	Positive	1.67103	108.044	3-Pyridinecarboxaldehyde	[M+H]+	C6H5NO	Pyridines and derivatives	1558444160
Pos_06090	Positive	2.08767	289.191	4-((1R,3S,5R,7R)-5,7-Dimethyl-1,3-Diazaadamantan-2-Yl)-2-Methoxyphenol	[M+H]+	C17H24N2O2	Methoxyphenols	740777664
Pos_30020	Positive	11.5675	353.139	4-(1,3-Benzodioxol-5-Ylmethyl)-3-[(3,4-Dimethoxyphenyl)Methyl]Oxolan-2-One	[M-H2O+H]+	C21H22O6	9,9'-epoxylignans	351804256
Pos_21485	Positive	8.37948	373.222	4-(2,6,6-Trimethyl-4-Oxo-2-Cyclohexen-1-Yl)-2-Butanyl Beta-D-Glucopyranoside	[M+H]+	C19H32O7	Fatty acyl glycosides	1645597696
Neg_19960	Negative	8.4611	507.114	4-(3,4-Dihydroxyphenyl)-5-Beta-D-Glucopyranosyloxy-7-Methoxycoumarin	[M+FA-H]-	C22H22O11	Coumarin glycosides	595848320
Neg_16914	Negative	7.6499	377.182	4-(Hydroxymethyl)-1-Isopropyl-3-Cyclohexen-1-Yl Beta-D-Glucopyranoside	[M+FA-H]-	C16H28O7	Terpene glycosides	601636416
Neg_13236	Negative	6.4934	216.981	4-(Sulfooxy)Benzoic Acid	[M-H]-	C7H6O6S	Phenylsulfates	2804948480
Pos_18207	Positive	7.72425	163.112	4,4Alpha,5,6-Tetrahydro-7-Methyl-2(3H)-Naphthalenone	[M+H]+	C11H14O	Organooxygen compounds	1118147712
Neg_19057	Negative	8.23667	515.12	4,5-Dicaffeoylquinic Acid	[M-H]-	C25H24O12	Cyclic alcohols and derivatives	7128212992
Pos_25017	Positive	9.45282	209.154	4,5-Dihydro-8,9-Dehydrotheaspirone	[M+Na]+	C13H20O2	Dihydrofurans	961375936
Pos_27934	Positive	10.58	315.087	4',5-Dihydroxy-7,8-Dimethoxyflavone	[M+H]+	C17H14O6	Flavonoids	645394432
Pos_14684	Positive	7.00098	151.112	4,5-Dimethyl-2-Ethylphenol	[M+H]+	C10H14O	Phenols	708831680
Neg_26888	Negative	10.1926	329.067	4,6-Dihydroxy-2-[(4-Hydroxy-3,5-Dimethoxyphenyl)Methylidene]-3-Benzofuranone	[M-H]-	C17H14O7	Aurone flavonoids	1197040000
Neg_24944	Negative	9.63448	263.093	4,7,8-Trimethoxy-3,5-Dimethylchromen-2-One	[M-H]-	C14H16O5	Coumarins and derivatives	247870240
Pos_29254	Positive	11.2054	277.217	4,8,12,15-Octadecatetraenoic Acid	[2M+H]+	C18H28O2	Fatty Acyls	2314799616
Pos_36725	Positive	13.8181	182.118	4-[(2R)-1-Hydroxy-2-(Methylamino)Propyl]Phenol	[M+H]+	C10H15NO2	Benzene and substituted derivatives	519047680
Pos_13326	Positive	6.59747	303.134	4-[Formyl(6-Methoxyquinolin-8-Yl)Amino]Pentanoic Acid	[M+H]+	C16H18N2O4	Quinolines and derivatives	558172608
Neg_10949	Negative	5.40865	144.067	4-Acetamidobutanoate	[M-H]-	C6H11NO3	Amino acids and derivatives	6073987072
Neg_28484	Negative	10.7494	213.149	4-Acetoxy-2-Hexyltetrahydrofuran	[M-H]-	C12H22O3	Tetrahydrofurans	560724800
Pos_22636	Positive	8.68602	195.102	4-Allyl-2,6-Dimethoxyphenol	[M+H]+	C11H14O3	Methoxyphenols	722008448
Pos_14407	Positive	6.93143	152.071	4-Aminophenylacetic Acid	[M+H]+	C8H9NO2	Benzene and substituted derivatives	1071872896
Pos_09197	Positive	4.55612	194.081	4-Anilino-4-Oxobutanoic Acid	[M+NH4]+	C10H11NO3	Benzene and substituted derivatives	1207604864
Pos_36715	Positive	13.8181	154.086	4-Deoxypyridoxine	[M+H-H2O]+	C8H11NO2	Pyridines and derivatives	980468224
Pos_34461	Positive	13.2066	122.096	4-Ethylaniline	[M+H]+	C8H11N	Benzene and substituted derivatives	1617035392
Neg_24907	Negative	9.62058	201.022	4-Ethylphenylsulfate	[M-H]-	C8H10O4S	Phenylsulfates	419443840
Pos_17266	Positive	7.54345	369.118	4-Feruloylquinic Acid	[M+H]+	C17H20O9	Quinic acid and derivatives	428607648
Neg_12175	Negative	6.11727	331.067	4-Glucogallic Acid	[M-H2O-H]-	C13H16O10	Organooxygen compounds	470827680
Pos_21439	Positive	8.36558	422.219	4-Hydroxy Estradiol 1-N3-Adenine	[M+H]+	C23H27N5O3	Estrogens and derivatives	3011678720
Pos_14145	Positive	6.86188	337.105	4-Hydroxy-2',4',6'-Trimethoxychalcone	[M+Na]+	C18H18O5	Cinnamylphenols	352520352
Pos_13220	Positive	6.5696	127.04	4-Hydroxy-2H-Pyran-3-Carboxaldehyde	[M+Na]+	C6H6O3	Pyrans	7764669952
Pos_25712	Positive	9.67572	139.111	4-Hydroxy-2-Nonenal	[M+H-H2O]+	C9H16O2	Fatty alcohols	610089216
Pos_14301	Positive	6.90365	205.122	4-Hydroxy-3-(3-Methyl-2-Butenyl)Acetophenone	[M+H]+	C13H16O2	Ketones	283894208
Pos_11981	Positive	6.15145	266.118	4-Hydroxy-5,7-Dimethyl-3-Phenylhydroquinolin-2-One	[M+H]+	C17H15NO2	Phenylquinolines	908324928
Pos_19354	Positive	7.93328	123.044	4-Hydroxybenzaldehyde	[M+H]+	C7H6O2	Aldehydes	1354100096
Neg_13780	Negative	6.68802	299.077	4-Hydroxybenzoyl Glucose	[M-H]-	C13H16O8	Organooxygen compounds	740494400
Pos_10390	Positive	5.7749	224.129	4-Hydroxybenzoylcholine	[M]+	C12H18NO3+	Benzoic acid esters	154133424
Pos_15261	Positive	7.12613	125.06	4-Hydroxybenzyl Alcohol	[M+H]+	C7H8O2	Benzene and substituted derivatives	1397330944
Pos_17198	Positive	7.52955	196.06	4-Hydroxyhippuric Acid	[M+H]+	C9H9NO4	Benzamides	1083183616
Pos_13265	Positive	6.58348	146.06	4-Hydroxyquinoline	[M+H]+	C9H7NO	Hydroquinolones	1989718912
Pos_22698	Positive	8.69997	465.139	4'-Methoxy-7-O-Beta-D-Glucopyranosyl-8,3'-Dihydroxyflavanone	[M+H]+	C22H24O11	Flavonoid O-glycosides	2082497408
Neg_24904	Negative	9.62058	167.035	4-Methoxysalicylic Acid	[M-H]-	C8H8O4	Methoxybenzoic acids and derivatives	1227915008
Pos_10944	Positive	5.9003	255.174	4-Methylbenzylidenecamphor	[M+H]+	C18H22O	Bicyclic monoterpenoids	523818080
Neg_27924	Negative	10.5545	253.145	4-Methylene-2-Octyl-5-Oxotetrahydrofuran-3-Carboxylic Acid	[M-H]-	C14H22O4	Lactones	491372384
Neg_28965	Negative	10.9166	383.044	4'-Methylepicatechin 3'-Sulfate	[M-H]-	C16H16O9S	Flavonoids	783517120
Pos_33493	Positive	12.9252	83.0604	4-Methylimidazole	[M+H]+	C4H6N2	Azoles	413791008
Pos_27131	Positive	10.2464	163.039	4-Methylphthalic Anhydride	[M+H]+	C9H6O3	Phthalic anhydrides	7846786560
Pos_31555	Positive	12.2786	130.087	4-Methylproline	[M+H]+	C6H11NO2	Carboxylic acids and derivatives	296501440
Pos_04303	Positive	1.42085	353.087	4-Methylumbelliferyl Glucuronide	[M+H]+	C16H16O9	Coumarin glycosides	260237552
Pos_20941	Positive	8.22605	420.203	4-OHE1-1-N3Ade	[M+H]+	C23H25N5O3	---	528847424
Pos_26076	Positive	9.81492	183.065	4-O-Methylphloroacetophenone	[M+H]+	C9H10O4	Ketones	483525760
Pos_22555	Positive	8.65803	345.11	4-Oxo-3-Phenyl-6-Propyl-4H-Chromen-7-Yl Acetate	[M+Na]+	C20H18O4	Isoflavones	760573632
Pos_07194	Positive	2.78125	130.05	4-Oxo-L-Proline	[M+H]+	C5H7NO3	Carboxylic acids and derivatives	24575842304
Pos_13269	Positive	6.58348	174.149	4-Piperidinol, 1-Hydroxy-2,2,6,6-Tetramethyl-	[M+H]+	C9H19NO2	Piperidines	1088433536
Neg_12741	Negative	6.32603	182.046	4-Pyridoxate	[M-H]-	C8H9NO4	Pyridinecarboxylic acids	1347825536
Pos_29481	Positive	11.3165	109.101	4-Vinylcyclohexene	[M+H-H2O]+	C8H12	Unsaturated hydrocarbons	3072315392
Pos_30270	Positive	11.679	244.17	5-(2-Methoxyphenyl)-4-Azabicyclo[4.4.0]Decan-1-Ol	[M+H-H2O]+	C16H23NO2	Phenylpiperidines	1675240192
Pos_16364	Positive	7.36258	166.087	5-(3-Pyridyl)-2-Hydroxytetrahydrofuran	[M+H]+	C9H11NO2	Pyridines and derivatives	1032912832
Pos_19720	Positive	7.98898	225.148	5-(6-Methyl-7-Oxooctyl)Furan-2(5H)-One	[M+H]+	C13H20O3	Butenolides	2625071872
Pos_14191	Positive	6.87575	113.06	5,5-Dimethyl-2(5H)-Furanone	[M+H]+	C6H8O2	Dihydrofurans	1846593536
Pos_16446	Positive	7.37645	183.092	5,6-Dihydro-1,10-Phenanthroline	[M+H]+	C12H10N2	Phenanthrolines	457943680
Pos_25291	Positive	9.53643	347.076	5,7,3',4'-Tetrahydroxy-6,8-Dimethoxyflavone	[M+H]+	C17H14O8	8-O-methylated flavonoids	216432064
Neg_22099	Negative	8.95007	205.051	5,7-Dihydroxy-2,8-Dimethyl-4H-Chromen-4-One	[M-H]-	C11H10O4	Chromones	699120960
Neg_28715	Negative	10.833	343.082	5,7-Dihydroxy-3',4',5'-Trimethoxyflavone	[M-H]-	C18H16O7	Flavonoids	1894345600
Pos_09681	Positive	5.12397	174.124	5-[(1-Iminoethyl)Amino]-2-Aminopentanoic Acid	[M+H]+	C7H15N3O2	Carboxylic acids and derivatives	928913600
Neg_32542	Negative	12.474	331.191	5-[2-(Furan-3-Yl)Ethyl]-8-Hydroxy-5,6,8A-Trimethyl-3,4,4A,6,7,8-Hexahydronaphthalene-1-Carboxylic Acid	[M-H]-	C20H28O4	Colensane and clerodane diterpenoids	123372032
Pos_04686	Positive	1.57385	188.092	5-Acetamido-4-Oxohexanoic Acid	[M+H]+	C8H13NO4	Medium-chain keto acids and derivatives	391062208
Pos_23046	Positive	8.8116	168.102	5-Acetyl-2,6-Dimethyl-2,3-Dihydro-1H-Pyridin-4-One	[M+H]+	C9H13NO2	Tetrahydropyridines	475926496
Neg_15327	Negative	7.17592	353.087	5-Caffeoylquinic Acid	[M-H2O-H]-	C16H18O9	Organooxygen compounds	1832140672
Neg_19769	Negative	8.4189	287.15	5-Cx-MEHA	[M-H]-	C14H24O6	---	1628435968
Neg_15543	Negative	7.23158	159.066	5-Dihydroxyhept-6-Enoic Acid	[M-H]-	C7H12O4	Fatty Acyls	1151620480
Neg_24687	Negative	9.56485	213.113	5-Hexyltetrahydro-2-Oxo-3-Furancarboxylic Acid	[M-H]-	C11H18O4	Lactones	466198368
Pos_23115	Positive	8.82555	593.186	5-Hydroxy-3-(4-Methoxyphenyl)-7-[3,4,5-Trihydroxy-6-[(3,4,5-Trihydroxy-6-Methyloxan-2-Yl)Oxymethyl]Oxan-2-Yl]Oxychromen-4-One	[M+H]+	C28H32O14	Isoflavonoid O-glycosides	2574934784
Neg_21210	Negative	8.7265	521.13	5-Hydroxy-3-(5-Hydroxy-2,4-Dimethoxyphenyl)-6-Methoxy-7-[3,4,5-Trihydroxy-6-(Hydroxymethyl)Oxan-2-Yl]Oxychromen-4-One	[M-H]-	C24H26O13	Isoflavonoid O-glycosides	126432984
Pos_09711	Positive	5.15165	185.09	5-Hydroxylysine	[M+Na]+	C6H14N2O3	Amino acids and derivatives	1210576768
Pos_36713	Positive	13.8181	143.034	5-Hydroxymaltol	[M+NH4]+	C6H6O4	Pyrans	1449453824
Pos_16443	Positive	7.37645	153.055	5-Methoxysalicylaldehyde	[M+H]+	C8H8O3	Methoxyphenols	331283648
Pos_09307	Positive	4.68082	126.066	5-Methylcytosine	[M+H]+	C5H7N3O	Hydroxypyrimidines	632294336
Pos_15840	Positive	7.25123	337.092	5-O-Caffeoylshikimic Acid	[M+H]+	C16H16O8	Coumaric acids and derivatives	333765664
Neg_32419	Negative	12.4047	297.243	5-Oxooctadecanoic Acid	[M-H2O-H]-	C18H34O3	Fatty Acyls	261355840
Neg_17434	Negative	7.80312	341.097	6-(2-1,2,3,4-Tetrahydroisoquinolylsulfonyl)-1,3,4-Trihydroquinolin-2-One	[M-H]-	C18H18N2O3S	Hydroquinolones	83366920
Pos_23446	Positive	8.93708	251.164	6,7-Bis(Hydroxymethyl)-4,9A-Dimethyl-2,7,8,9-Tetrahydro-1H-Benzo[7]Annulen-3-One	[M+H]+	C15H22O3	Ketones	2578085376
Pos_11978	Positive	6.15145	238.107	6,7-Dimethoxy-1,2,3,4-Tetrahydroisoquinoline-3-Carboxylic Acid	[M+H]+	C12H15NO4	Tetrahydroisoquinolines	349783392
Neg_15748	Negative	7.28757	421.166	6,8-Diprenylorobol	[M-H]-	C25H26O6	Isoflavanones	195938704
Pos_30948	Positive	11.9993	317.172	6-[(2E,4E)-4,6-Dimethyl-2,4-Octadienoyl]-2,3-Dihydroxy-2-Methylcyclohexanone	[M+Na]+	C17H26O4	1,3-dicarbonyl compounds	146620368
Pos_15159	Positive	7.09833	427.138	6-Amino-3-Phenyl-4-(3,4,5-Trimethoxyphenyl)-4H-Pyrano[2,3-C]Pyrazole-5-Carboni Trile	[M+Na]+	C22H20N4O4	Phenylpyrazoles	443857376
Pos_25255	Positive	9.52243	561.158	6-Feruloylcatalpol	[M+Na]+	C25H30O13	Coumaric acids and derivatives	541003648
Pos_28238	Positive	10.733	345.097	6-Hydroxyluteolin 7,3',4'-Trimethyl Ether	[M+CH3OH+H]+	C18H16O7	Flavonoids	4128145408
Pos_06999	Positive	2.64267	140.034	6-Hydroxynicotinate	[M+H]+	C6H5NO3	Pyridinecarboxylic acids	3514589184
Pos_05825	Positive	1.96272	216.124	6-Hydroxyoct-1-Enoylglycine	[M+H]+	C10H17NO4	Carboxylic acids and derivatives	5135399936
Pos_19362	Positive	7.93328	205.05	6-Methoxy-4-Oxo-4H-Chromene-3-Carbaldehyde	[M+H]+	C11H8O4	Chromones	178341456
Pos_23936	Positive	9.09043	258.112	6-Methoxyflindersine	[M+H]+	C15H15NO3	Pyranoquinolines	195531808
Pos_19790	Positive	8.00295	161.06	6-Methyl Coumarin	[M+H]+	C10H8O2	Coumarins and derivatives	3503229440
Pos_06928	Positive	2.58718	144.102	6-Methylpiperidine-2-Carboxylic Acid	[M+H]+	C7H13NO2	Amino acids and derivatives	1302496128
Pos_23318	Positive	8.89517	475.123	6'-O-Acetylgenistin	[M+H]+	C23H22O11	Isoflavonoid O-glycosides	1962014848
Pos_26049	Positive	9.801	489.139	6''-O-Acetylglycitin	[M+H]+	C24H24O11	Isoflavonoid O-glycosides	5163420160
Pos_21933	Positive	8.49093	477.103	6-O-Methylscutellarin	[M+H]+	C22H20O12	Flavonoid O-glycosides	1138409600
Pos_09872	Positive	5.3041	144.066	6-Oxopiperidine-2-Carboxylic Acid	[M+CH3OH+H]+	C6H9NO3	Carboxylic acids and derivatives	3365594112
Pos_28425	Positive	10.8303	277.18	6-Shogaol	[M+H]+	C17H24O3	Shogaols	2754576384
Neg_31919	Negative	12.1684	403.248	7A,12A-Dihydroxy-3-Oxo-4-Cholenoic Acid	[M-H]-	C24H36O5	Steroids and steroid derivatives	76638456
Pos_29980	Positive	11.5536	432.238	7B,9-Dihydroxy-3-(Hydroxymethyl)-1,1,6,8-Tetramethyl-5-Oxo-1,1A,1B,4,4A,5,7A,7B,8,9-Decahydro-9Ah-Cyclopropa[3,4]Benzo[1,2-E]Azulen-9A-Yl Acetate	[M+ACN+H]+	C22H30O6	Tigliane and ingenane diterpenoids	1735463552
Pos_29771	Positive	11.4419	359.113	7-Demethyltangeretin	[M+H]+	C19H18O7	Flavonoids	9201258496
Neg_17360	Negative	7.78917	225.113	7-Epi-12-Hydroxyjasmonic Acid	[M-H]-	C12H18O4	Fatty Acyls	3641078272
Pos_15070	Positive	7.08445	411.163	7-Epi-12-Hydroxyjasmonic Acid Glucoside	[M+Na]+	C18H28O9	Fatty acyl glycosides	219971920
Neg_26406	Negative	10.0393	209.118	7-Epijasmonic Acid	[M-H]-	C12H18O3	Fatty Acyls	414579232
Neg_05269	Negative	1.31042	237.056	7-Hydroxyflavone	[M-H]-	C15H10O3	Flavones	431332640
Neg_12193	Negative	6.13117	185.046	7-Oxabicyclo(2.2.1)Heptane-2,3-Dicarboxylic Acid, (1R,2S,3R,4S)-Rel-	[M-H]-	C8H10O5	Dicarboxylic acids and derivatives	558845824
Pos_26851	Positive	10.1211	253.217	7Z,10Z-Hexadecadienoic Acid	[M+H]+	C16H28O2	Fatty Acyls	881546688
Pos_31966	Positive	12.4049	281.248	8,12-Octadecadienoic Acid	[M+H]+	C18H32O2	Fatty Acyls	146887440
Pos_29021	Positive	11.0942	233.153	8Beta-Hydroxyeremophilenolide	[M-H2O+H]+	C15H22O3	Terpene lactones	15732007936
Pos_22151	Positive	8.54665	251.164	8-Hydroxy-11-(Hydroxymethyl)-1,5,11-Trimethyltricyclo[6.2.1.02,6]Undec-2-En-9-One	[M+H]+	C15H22O3	Tertiary alcohols	1415051648
Pos_25356	Positive	9.55038	300.181	8-Hydroxy-4-(2-Hydroxypropan-2-Yl)-10-Oxatricyclo[7.2.1.01,5]Dodec-3-Ene-8-Carboxylic Acid	[M+NH4]+	C15H22O5	Alpha hydroxy acids and derivatives	508875520
Pos_11892	Positive	6.12362	214.109	8-Methyl-IQX	[M+H]+	C11H11N5	Quinoxalines	743388992
Pos_13355	Positive	6.61137	144.081	8-Methylquinoline	[M+H]+	C10H9N	Quinolines and derivatives	1510177280
Neg_04098	Negative	0.863983	266.089	8-Oxo-2-Deoxyadenosine	[M-H]-	C10H13N5O4	Purine 2'-deoxyribonucleosides	220831568
Neg_18098	Negative	7.95715	261.134	9-(2,3-Dihydroxypropoxy)-9-Oxononanoic Acid	[M-H]-	C12H22O6	Medium-chain fatty acids	276215168
Neg_26034	Negative	9.92763	329.233	9,10,13-Trihome	[M-H]-	C18H34O5	Fatty Acyls	24122798080
Neg_29757	Negative	11.2088	311.222	9,10-Dihode	[M-H]-	C18H32O4	Fatty Acyls	6453295616
Neg_31677	Negative	12.0572	315.254	9,10-Dihydroxystearic Acid	[M-H]-	C18H36O4	Fatty Acyls	728629312
Neg_32448	Negative	12.4185	313.238	9,10-Epoxyoctadecanoic Acid	[M-H]-	C18H34O4	Fatty Acyls	276056000
Neg_27507	Negative	10.4014	329.233	9,12,13-Trihome	[M-H]-	C18H34O5	Fatty Acyls	6627269120
Neg_31117	Negative	11.793	327.218	9-F1-Phytoprostane	[M-H]-	C18H32O5	Fatty Acyls	579929536
Neg_33252	Negative	12.8901	331.191	9-Hydroxy-7-(2-Hydroxypropan-2-Yl)-1,4A-Dimethyl-2,3,4,9,10,10A-Hexahydrophenanthrene-1-Carboxylic Acid	[M-H]-	C20H28O4	Diterpenoids	716307648
Pos_30484	Positive	11.7766	275.2	9-Oxootre	[M+H-H2O]+	C18H28O3	Lineolic acids and derivatives	926837760
Pos_24583	Positive	9.31347	247.133	Abscisic Acid	[M+H-H2O]+	C15H20O4	Abscisic acids and derivatives	1184545792
Pos_25407	Positive	9.56435	331.248	Acaranoic Acid	[M+CH3OH+H]+	C17H30O4	Delta valerolactones	399901920
Pos_14409	Positive	6.93143	180.065	Acedoben	[M+H]+	C9H9NO3	Benzoic acids	4592119808
Pos_15714	Positive	7.22345	327.153	Acepromazine	[M+H]+	C19H22N2OS	Phenothiazines	361315232
Neg_26995	Negative	10.2205	359.077	Acerosin	[M-H]-	C18H16O8	Flavonoids	1746042496
Pos_12946	Positive	6.48597	152.071	Acetaminophen	[M+H]+	C8H9NO2	1-hydroxy-2-unsubstituted benzenoids	1325600512
Neg_07863	Negative	2.82487	85.0295	Acetoacetaldehyde	[M-H2O-H]-	C4H6O2	Organooxygen compounds	827080384
Pos_10345	Positive	5.76105	86.06	Acetone Cyanohydrin	[M+H]+	C4H7NO	Organooxygen compounds	2046201984
Pos_05185	Positive	1.75458	204.123	Acetylcarnitine	[M+H]+	C9H17NO4	Acyl carnitines	525223296
Pos_19135	Positive	7.89143	174.112	Acetylleucine	[M+H]+	C8H15NO3	Amino acids and derivatives	464457216
Pos_03917	Positive	1.25388	296.07	Acetylsulfamethoxazole	[M+H]+	C12H13N3O4S	Benzenesulfonamides	415834752
Neg_28266	Negative	10.6659	267.16	Acoric Acid	[M-H]-	C15H24O4	Prenol lipids	916925824
Pos_16367	Positive	7.36258	194.081	Actarit	[M+H]+	C10H11NO3	Benzene and substituted derivatives	2536394752
Pos_05172	Positive	1.75458	136.062	Adenine	[M+H]+	C5H5N5	6-aminopurines	15273979904
Pos_10560	Positive	5.83052	268.105	Adenosine	[M+Na]+	C10H13N5O4	Purine nucleosides	45329342464
Neg_34152	Negative	13.3895	145.051	Adipic Acid	[M-H]-	C6H10O4	Medium-chain fatty acids	415648224
Neg_05937	Negative	1.54692	202.072	Adipoylglycine	[M-H]-	C8H13NO5	Carboxylic acids and derivatives	832722560
Neg_16049	Negative	7.37137	177.019	Aesculetin	[M-H]-	C9H6O4	6,7-dihydroxycoumarins	3041220608
Neg_13395	Negative	6.54897	339.072	Aesculin	[M-H]-	C15H16O9	Coumarin glycosides	507513280
Pos_04251	Positive	1.40697	132.102	Alanine Betaine	[M+H]+	C6H13NO2	Amino acids and derivatives	1192670976
Pos_11940	Positive	6.13758	255.136	Alantolactone	[M+Na]+	C15H20O2	Sesquiterpene lactones	440630400
Pos_11735	Positive	6.0817	203.139	Alanylleucine	[M+H]+	C9H18N2O3	Peptides	3349329920
Pos_12431	Positive	6.31872	237.123	Alanylphenylalanine	[M+H]+	C12H16N2O3	Peptides	496365088
Pos_27737	Positive	10.4967	187.108	Alanylproline	[M+H-H2O]+	C8H14N2O3	Carboxylic acids and derivatives	2105165824
Pos_27995	Positive	10.6079	309.206	Albocycline	[M+H]+	C18H28O4	Macrolides and analogues	2805864960
Neg_33059	Negative	12.7929	263.128	Alkhanin	[M-H]-	C15H20O4	Prenol lipids	163693952
Neg_28490	Negative	10.7494	265.144	Alkhanol	[M-H]-	C15H22O4	Prenol lipids	711040960
Neg_35004	Negative	13.8195	161.045	Allose	[M-H2O-H]-	C6H12O6	Monosaccharides	4272108544
Neg_22335	Negative	9.00582	289.108	Alpha,Beta-Dehydrocurvularin	[M-H]-	C16H18O5	Macrolides and analogues	7367986688
Neg_14545	Negative	6.91123	199.097	Alpha-Carboxy-Delta-Nonalactone	[M-H]-	C10H16O4	Lactones	694612288
Pos_30051	Positive	11.5815	219.174	Alpha-Cyperone	[M+H]+	C15H22O	Eudesmane, isoeudesmane or cycloeudesmane sesquiterpenoids	11319788544
Neg_13132	Negative	6.45157	487.146	Alpha-D-Glucopyranoside, Beta-L-Fructofuranosyl 6-O-[(2E)-3-(4-Hydroxyphenyl)-1-Oxo-2-Propen-1-Yl]-	[M-H]-	C21H28O13	Hydroxycinnamic acid esters	288219840
Pos_30014	Positive	11.5675	279.232	Alpha-Eleostearic Acid	[M+H]+	C18H30O2	Fatty Acyls	838368704
Pos_17658	Positive	7.61308	136.076	Alpha-Phenylacetamide	[M+H]+	C8H9NO	Phenylacetamides	619531584
Pos_11183	Positive	5.95588	190.107	Amino Adipic Acid Dimethyl Ester	[M+H]+	C8H15NO4	Amino acids and derivatives	474438592
Pos_10859	Positive	5.88627	144.065	Aminoadipic Acid	[M-H2O+H]+	C6H11NO4	Amino acids and derivatives	1410048000
Pos_05600	Positive	1.86558	158.094	Amphetamine	[M+Na]+	C9H13N	Amphetamines and derivatives	7577675776
Pos_10735	Positive	5.85835	254.165	Anabasamine	[M+H]+	C16H19N3	Bipyridines and oligopyridines	1020921600
Pos_30952	Positive	11.9993	333.206	Andrographolide	[M+H-H2O]+	C20H30O5	Gamma butyrolactones	217783840
Pos_04411	Positive	1.46265	287.201	Androstenedione	[M+H]+	C19H26O2	Androgens and derivatives	628322176
Pos_04326	Positive	1.43482	168.102	Anhydroecgonine	[M+H]+	C9H13NO2	Pyrrolidines	645361088
Pos_25013	Positive	9.45282	109.065	Anisole	[M+Na]+	C7H8O	Phenol ethers	1796561152
Neg_20787	Negative	8.64263	269.046	Apigenin	[M-H]-	C15H10O5	Flavones	2273945344
Pos_21354	Positive	8.33763	447.092	Apigenin 7-Glucuronide	[M+H]+	C21H18O11	Flavonoid O-glycosides	684659328
Pos_24681	Positive	9.34137	565.155	Apiin	[M+H]+	C26H28O14	Flavonoid O-glycosides	348715392
Neg_04175	Negative	0.905767	165.04	Arabinonic Acid	[M-H]-	C5H10O6	Organooxygen compounds	4284062720
Pos_04132	Positive	1.36532	175.119	Arginine	[M+H]+	C6H14N4O2	Amino acids and derivatives	3281045504
Neg_26492	Negative	10.0671	265.144	Arlatin	[M-H]-	C15H22O4	Prenol lipids	678370368
Pos_30303	Positive	11.6929	389.123	Artemetin	[M+H]+	C20H20O8	7-O-methylated flavonoids	17803960320
Pos_26180	Positive	9.85672	265.143	Artemisinin	[M+H-H2O]+	C15H22O5	Terpene lactones	831969472
Neg_08632	Negative	3.43578	155.035	Ascladiol Z	[M-H]-	C7H8O4	Butenolides	499226112
Pos_04345	Positive	1.43482	455.116	Asperulosidic Acid	[M+Na]+	C18H24O12	Iridoid O-glycosides	107002800
Pos_25638	Positive	9.64785	346.259	Aspicilin	[M+NH4]+	C18H32O5	Macrolides and analogues	802743296
Pos_30866	Positive	11.9715	267.159	Aspterric Acid	[M+H]+	C15H22O4	Alpha hydroxy acids and derivatives	521959072
Neg_24439	Negative	9.49507	405.119	Astringin	[M-H]-	C20H22O9	Stilbene glycosides	460119840
Pos_31282	Positive	12.1529	297.243	Avenoleic Acid	[M+H-H2O]+	C18H32O3	Fatty Acyls	760400768
Pos_28992	Positive	11.0803	268.17	Azacyclonol	[M+H]+	C18H21NO	Diphenylmethanes	955494464
Neg_21195	Negative	8.7265	187.098	Azelaic Acid	[M-H]-	C9H16O4	Medium-chain fatty acids	6695538176
Pos_29402	Positive	11.2748	257.19	Bakuchiol	[M+H]+	C18H24O	Aromatic monoterpenoids	620410368
Neg_28901	Negative	10.9027	243.103	Batatasin III	[M-H]-	C15H16O3	Stilbenes	336793536
Pos_14248	Positive	6.8897	347.125	Bavachin	[M+Na]+	C20H20O4	6-prenylated flavans	383092608
Pos_28318	Positive	10.7747	304.299	Benzododecinium	[M]+	C21H38N+	Phenylmethylamines	670591680
Neg_12567	Negative	6.2425	359.098	Benzoic acid + 1O, 2MeO, O-Hex	[M-H]-	C15H20O10	Phenolic glycosides	232863744
Neg_12356	Negative	6.1729	315.072	Benzoic Acid + 2O, O-Hex	[M-H]-	C13H16O9	Phenolic glycosides	2806021120
Neg_13473	Negative	6.57683	285.06	Benzoic Acid + 2O, O-Pen	[M-H]-	C12H14O8	Phenolic glycosides-Pentose conjugate	1851899520
Neg_04202	Negative	0.919717	215.035	Bergapten	[M-H]-	C12H8O4	Psoralens	63097901056
Pos_04593	Positive	1.53213	351.069	Bergenin	[M+Na]+	C14H16O9	Hydroxybenzoic acid derivatives	274538976
Neg_04139	Negative	0.891833	88.0404	Beta-Alanine	[M-H]-	C3H7NO2	Amino acids and derivatives	285089056
Pos_15054	Positive	7.08445	169.076	Beta-Carboline	[M+H]+	C11H8N2	Beta carbolines	619127360
Neg_15105	Negative	7.12017	387.166	Beta-D-Glucopyranosyl-11-Hydroxyjasmonic Acid	[M-H]-	C18H28O9	Fatty Acyls	5408278528
Pos_04730	Positive	1.60165	198.097	Beta-D-Glucose	[M+NH4]+	C6H12O6	Monosaccharides	1787014528
Pos_04127	Positive	1.36532	118.086	Betaine	[M+H]+	C5H11NO2	Amino acids and derivatives	64741220352
Pos_23099	Positive	8.82555	308.222	Betaxolol	[M+H]+	C18H29NO3	Tyrosols and derivatives	608454656
Pos_31033	Positive	12.0413	270.185	Bifemelane	[M+H]+	C18H23NO	Diphenylmethanes	8855689216
Neg_34519	Negative	13.5146	283.061	Biochanin A	[M-H]-	C16H12O5	4'-O-methylated isoflavonoids	1059183168
Neg_31376	Negative	11.9182	251.165	Bisacurone B	[M-H]-	C15H24O3	Prenol lipids	469691808
Pos_26455	Positive	9.95425	418.28	Bonactin	[M+NH4]+	C21H36O7	Dicarboxylic acids and derivatives	722859904
Pos_30131	Positive	11.6234	304.227	Bornaprolol	[M+H]+	C19H29NO2	Prenol lipids	1029293120
Pos_11840	Positive	6.1097	232.154	Butyrylcarnitine	[M+H]+	C11H21NO4	Acyl carnitines	714746560
Neg_30251	Negative	11.4175	249.149	Cadabicilone	[M-H]-	C15H22O3	Prenol lipids	450912992
Pos_24710	Positive	9.35537	199.149	Cadalene	[M+H]+	C15H18	Prenol lipids	1280271488
Pos_13948	Positive	6.80623	163.039	Caffeic Acid	[M+H-H2O]+	C9H8O4	Hydroxycinnamic acids	7910496256
Neg_13785	Negative	6.68802	341.087	Caffeic Acid Hexoside	[M-H]-	C15H18O9	Caffeic acid and derivatives	1322695424
Pos_26340	Positive	9.89847	369.205	Calycanthine	[M+Na]+	C22H26N4	Aminoquinolines and derivatives	615678656
Pos_29293	Positive	11.2193	447.129	Calycosin 7-O-Glucoside	[M+H]+	C22H22O10	Isoflavonoid O-glycosides	423137280
Pos_11832	Positive	6.1097	160.097	Calystegine A6	[M+H]+	C7H13NO3	Tropane alkaloids	585167040
Neg_16549	Negative	7.53847	158.082	Calystegine A7	[M-H]-	C7H13NO3	Tropane alkaloids	557612160
Pos_08876	Positive	4.22345	176.092	Calystegine B5	[M+H]+	C7H13NO4	Tropane alkaloids	782737280
Pos_05572	Positive	1.85173	330.06	cAMP	[M+H]+	C10H12N5O6P	3',5'-cyclic purine nucleotides	6040453120
Pos_26013	Positive	9.78712	306.206	Capsaicin	[M+H]+	C18H27NO3	Methoxyphenols	994997632
Pos_07497	Positive	3.01735	256.082	Caramboxin	[M+H]+	C11H13NO6	Amino acids and derivatives	540308032
Pos_06575	Positive	2.37887	110.06	Carbapenem	[M+H]+	C6H7NO	Lactams	1628882560
Pos_14510	Positive	6.95922	379.152	Carinatone	[M+Na]+	C21H24O5	Stilbenes	150876544
Pos_04036	Positive	1.32348	162.112	Carnitine	[M+H]+	C7H15NO3	Carnitines	782096064
Pos_25502	Positive	9.60612	135.117	Carveol	[M+H-H2O]+	C10H16O	Menthane monoterpenoids	1366399872
Pos_24047	Positive	9.11827	505.132	Catalposide	[M+Na]+	C22H26O12	Glycosyl compounds	3062235136
Neg_12969	Negative	6.39567	109.03	Catechol	[M-H]-	C6H6O2	Catechols	1322726400
Pos_28431	Positive	10.8303	351.157	Cembratetraene-16,2:19,6-Diolide	[M+Na]+	C20H24O4	Diterpene lactones	604787712
Pos_24431	Positive	9.25782	287.056	Cernuine	[M+H]+	C15H10O6	Aurone flavonoids	8133866496
Pos_30670	Positive	11.8741	229.122	Chamazulenecarboxylic Acid	[M+H]+	C15H16O2	Prenol lipids	2712187136
Pos_30003	Positive	11.5675	135.081	Chavicol	[M+H]+	C9H10O	Phenols	597991232
Neg_20194	Negative	8.51692	473.073	Chicoric Acid	[M-H]-	C22H18O12	Tetracarboxylic acids and derivatives	316193152
Pos_13780	Positive	6.75045	355.102	Chlorogenic Acid	[M+H]+	C16H18O9	Cyclic alcohols and derivatives	8166264832
Pos_03901	Positive	1.25388	213.079	Chlorotoluron	[M+H]+	C10H13ClN2O	N-phenylureas	123914360
Pos_34096	Positive	13.0941	369.352	Cholesterol	[M+H-H2O]+	C27H46O	Cholesterols and derivatives	620334336
Pos_35135	Positive	13.3605	104.108	Choline	[M+H]+	C5H14NO+	Cholines	1602319360
Neg_26032	Negative	9.92763	299.056	Chrysoeriol	[M-H]-	C16H12O6	3'-O-methylated flavonoids	897131904
Neg_18929	Negative	8.19472	607.166	Chrysoeriol 7-Rutinoside	[M-H2O-H]-	C28H32O15	Flavonoids	74464528
Pos_20145	Positive	8.07282	131.049	Cinnamic Acid	[M-H2O+H]+	C9H8O2	Cinnamic acids	3680110848
Neg_32027	Negative	12.2101	291.197	Cis-12-Oxophytodienoic Acid	[M-H]-	C18H28O3	Fatty Acyls	245706032
Neg_08467	Negative	3.31083	187.024	Cis-2-Methylaconitate	[M-H]-	C7H8O6	Carboxylic acids and derivatives	1910682496
Neg_25686	Negative	9.84373	171.102	Cis-3-Hexenyl Lactate	[M-H]-	C9H16O3	Carboxylic acids and derivatives	276024000
Neg_15633	Negative	7.25955	171.066	Cis-4-Octenedioic Acid	[M-H]-	C8H12O4	Fatty Acyls	567755904
Neg_16949	Negative	7.66382	199.097	Cis-5-Decenedioic Acid	[M-H]-	C10H16O4	Fatty Acyls	899949184
Neg_06258	Negative	1.75542	173.009	Cis-Aconitate	[M-H]-	C6H6O6	Tricarboxylic acids and derivatives	9195184128
Pos_21913	Positive	8.49093	149.096	Cis-Anethole	[2M+H]+	C10H12O	Phenol ethers	923705280
Neg_07016	Negative	2.25537	147.03	Citramalic Acid	[M-H]-	C5H8O5	Fatty Acyls	8122115072
Neg_05551	Negative	1.38	191.02	Citric Acid	[M-H]-	C6H8O7	Tricarboxylic acids and derivatives	43999293440
Neg_27789	Negative	10.5128	169.123	Citronellic Acid	[M-H2O-H]-	C10H18O2	Prenol lipids	915264064
Pos_07184	Positive	2.76738	286.07	Cladribine	[M+H]+	C10H12ClN5O3	Purine 2'-deoxyribonucleosides	581496192
Pos_12803	Positive	6.4442	327.137	Clozapine	[M+H]+	C18H19ClN4	Dibenzodiazepines	478199488
Pos_26334	Positive	9.89847	295.227	Colneleic Acid	[M+H]+	C18H30O3	Fatty Acyls	4561043456
Pos_25635	Positive	9.64785	293.212	Colnelenic Acid	[M+H]+	C18H28O3	Fatty Acyls	3232653056
Neg_12280	Negative	6.159	161.046	Conduritol Epoxide	[M-H2O-H]-	C6H10O5	Oxepanes	6185481216
Pos_23566	Positive	8.96498	179.07	Coniferaldehyde	[M+H]+	C10H10O3	MethoxyphenolsInChIKey	1895768320
Neg_31054	Negative	11.7513	507.333	Contignasterol	[M-H]-	C29H48O7	Prenol lipids	301415168
Neg_28552	Negative	10.7634	307.191	Corchorifatty Acid D	[M-H]-	C18H28O4	Oxidized fatty acids	2005822848
Pos_07620	Positive	3.12848	274.091	Cordycepin	[M+Na]+	C10H13N5O3	Purine 3'-deoxyribonucleosides	9196091392
Pos_31612	Positive	12.2926	279.231	Coronaric Acid	[M+H-H2O]+	C18H32O3	Medium-chain fatty acids	2702241536
Pos_15786	Positive	7.23733	565.155	Corymboside	[M+H]+	C26H28O14	Flavonoid C-glycosides	425793216
Neg_19335	Negative	8.30682	431.098	Cosmosiin	[M-H]-	C21H20O10	Flavonoid O-glycosides	1801614848
Pos_20795	Positive	8.19808	233.154	Costunolide	[M+H]+	C15H20O2	Sesquiterpene lactones	2834268928
Pos_13960	Positive	6.80623	344.134	Coumaric Acid 4-O-Glucoside	[M+NH4]+	C15H18O8	Glycosyl compounds	482811424
Neg_14366	Negative	6.85538	325.092	Coumaroyl Hexoside	[M-H]-	C15H18O8	Coumaric acid and derivatives	1030960640
Neg_17088	Negative	7.69175	337.092	Coumaroyl Quinic Acid	[M-H]-	C16H18O8	Quinic acids and derivatives	1037439488
Pos_36133	Positive	13.5411	114.066	Creatine	[M+H-H2O]+	C4H9N3O2	Amino acids and derivatives	1198951808
Neg_14261	Negative	6.82738	353.088	Cryptochlorogenic Acid	[M-H]-	C16H18O9	Cyclic alcohols and derivatives	21312913408
Pos_29792	Positive	11.4558	239.201	Culmorin	[M+H]+	C15H26O2	Bicyclic monoterpenoids	1112316800
Pos_27135	Positive	10.2464	219.174	Curcumol	[M+H-H2O]+	C15H24O2	Guaianes	13766034432
Pos_25829	Positive	9.71752	217.159	Curzerene	[M+H]+	C15H20O	Aromatic monoterpenoids	7138124288
Pos_19944	Positive	8.03083	211.144	Cyclo(Pro-Leu)	[M+H]+	C11H18N2O2	Amino acids and derivatives	576520576
Pos_14616	Positive	6.98702	197.128	Cyclo(Pro-Val)	[M+H]+	C10H16N2O2	Amino acids and derivatives	426863040
Pos_34206	Positive	13.1223	621.4	Cycloorbigenin 3-O-Beta-D-Xylopyranoside	[M+H]+	C35H56O9	Cucurbitacin glycosides	227734640
Pos_06818	Positive	2.50397	86.0964	Cyclopentylamine	[M+H]+	C5H11N	Organonitrogen compounds	21594796032
Pos_06221	Positive	2.15697	226.134	Cyprodinil	[M+H]+	C14H15N3	Aniline and substituted anilines	1160708992
Pos_05190	Positive	1.75458	244.093	Cytidine	[M+H]+	C9H13N3O5	Pyrimidine nucleosides	1317552128
Pos_04169	Positive	1.37915	266.123	D-1-[(3-Carboxypropyl)Amino]-1-Deoxyfructose	[M+H]+	C10H19NO7	Amino acids and derivatives	8707433472
Pos_15055	Positive	7.08445	183.099	Dacarbazine	[M+H]+	C6H10N6O	Carboxylic acid amides	355214912
Pos_23009	Positive	8.79767	179.034	Daphnetin	[M+H]+	C9H6O4	7,8-dihydroxycoumarins	487257664
Neg_04545	Negative	1.04525	149.045	D-Arabinose	[M-H]-	C5H10O5	Organooxygen compounds	39460319232
Pos_30706	Positive	11.888	191.143	Dehydro-Beta-Ionone	[M+H]+	C13H18O	Prenol lipids	516872736
Pos_28555	Positive	10.8859	213.127	Dehydrocostus Lactone	[M+H-H2O]+	C15H18O2	Sesquiterpene lactones	2306684672
Pos_09353	Positive	4.72238	304.144	Dehydroevodiamine	[M+H]+	C19H17N3O	Beta carbolines	739934336
Pos_25757	Positive	9.68962	133.102	Dehydro-P-Cymene	[M+NH4]+	C10H12	Benzene and substituted derivatives	910847680
Pos_13639	Positive	6.69483	213.112	Dehydro-Piliformic-Acid	[M+H]+	C11H16O4	Medium-chain fatty acids	722867136
Pos_13226	Positive	6.5696	225.123	Deisopropylatenolol	[M+H]+	C11H16N2O3	Phenylacetamides	760180800
Pos_23274	Positive	8.88127	249.11	Dendrodolide N	[M+Na]+	C12H18O4	Macrolides and analogues	813688832
Pos_18442	Positive	7.7661	344.258	Denudatine	[M+H]+	C22H33NO2	Napelline-type diterpenoid alkaloids	187509856
Pos_10555	Positive	5.83052	252.109	Deoxyadenosine	[M+H]+	C10H13N5O3	Purine 2'-deoxyribonucleosides	3738753536
Pos_04756	Positive	1.61552	146.118	Deoxycarnitine	[M+H]+	C7H15NO2	Straight chain fatty acids	1212476032
Pos_29025	Positive	11.0942	327.086	Derrustone	[M+H]+	C18H14O6	7-O-methylated isoflavonoids	1177203968
Pos_26658	Positive	10.0377	249.149	Desacetyllaurenobiolide	[M+NH4]+	C15H20O3	Prenol lipids	1465043200
Pos_31239	Positive	12.139	272.201	Dextromethorphan	[M+H]+	C18H25NO	Morphinans	6599948288
Neg_30197	Negative	11.3896	721.363	DGMG(18:3)	[M+HCOO]-	C33H56O14	Lipids	118068840
Pos_08829	Positive	4.1819	348.07	dGMP	[M+H]+	C10H14N5O7P	Purine deoxyribonucleoside monophosphates	957320832
Neg_06160	Negative	1.68593	177.04	D-Gulono-1,4-Lactone	[M-H]-	C6H10O6	Gamma butyrolactones	5465235456
Pos_19624	Positive	7.97503	243.102	Dibenzyl Carbonate	[2M+H]+	C15H14O3	Benzene and substituted derivatives	259206544
Neg_25406	Negative	9.76002	515.117	Dicaffeoyl Quinic Acid	[M-H]-	C25H24O12	Quinic acids and derivatives	665809216
Pos_20174	Positive	8.07282	499.123	Dicaffeoylquinic Acid	[M-H2O+H]+	C25H24O12	Cyclic alcohols and derivatives	958529600
Pos_29564	Positive	11.3443	333.204	Dihydroalbocycline	[M+Na]+	C18H30O4	Macrolides and analogues	700781504
Pos_27741	Positive	10.4967	211.112	Dihydrochalcone	[M+H]+	C15H14O	Retro-dihydrochalcones	1066010368
Neg_20234	Negative	8.53085	265.072	Dihydrocitrinone	[M-H]-	C13H14O6	Phthalic acid and derivatives	447712576
Pos_26972	Positive	10.1769	167.143	Dihydrojasmone	[M+H]+	C11H18O	Ketones	910063232
Pos_28026	Positive	10.6218	313.237	Dihydroxyoctadecadienoic Acid	[M+H]+	C18H32O4	Lineolic acids and derivatives	3722585344
Neg_08059	Negative	2.96385	133.05	Dihydroxy-Valerate	[M-H]-	C5H10O4	Hydroxy fatty acids	4349258752
Pos_17440	Positive	7.57128	252.123	Dimethachlor OXA	[M+H]+	C13H17NO4	Amino acids and derivatives	536888256
Neg_21506	Negative	8.7964	273.007	Dimethyl 5-Sulphoisophthalate	[M-H]-	C10H10O7S	Phthalic acid and derivatives	961688448
Pos_29047	Positive	11.1081	242.284	Dimethyl Myristamine	[M+H]+	C16H35N	Tertiary amines	2123433984
Pos_05237	Positive	1.76845	79.0212	Dimethyl Sulfoxide	[M+H]+	C2H6OS	Sulfoxides	1063284736
Pos_20519	Positive	8.1424	140.071	Dimethyl-3-Hydroxypyrid-4-One	[M+H]+	C7H9NO2	Pyridines and derivatives	334496096
Pos_29189	Positive	11.1775	90.0919	Dimethylethanolamine	[M+CH3OH+H]+	C4H11NO	Organonitrogen compounds	112757424
Neg_11798	Negative	6.00588	239.067	Dinoseb	[M-H]-	C10H12N2O5	Dinitrophenols	681260544
Pos_26377	Positive	9.91237	301.071	Diosmetin	[M+H]+	C16H12O6	4'-O-methylated flavonoids	6993004032
Pos_19889	Positive	8.01688	609.181	Diosmin	[M+H]+	C28H32O15	Flavonoid O-glycosides	59670696
Pos_29924	Positive	11.5257	264.134	Dioxypyramidon	[M+H]+	C13H17N3O3	Amino acids and derivatives	516724608
Neg_11665	Negative	5.978	385.135	Disaccharides ((2Methyl-Hex)-Pen)	[M+FA-H]-	C13H24O10	Sugars	127308792
Pos_11428	Positive	5.99795	103.05	Dl-Cycloserine	[M+H]+	C3H6N2O2	Amino acids and derivatives	2733128960
Pos_07616	Positive	3.12848	132.102	D-Leucine	[M+H]+	C6H13NO2	Carboxylic acids and derivatives	69758935040
Pos_01987	Positive	1.09223	147.113	D-Lysine	[M+NH4]+	C6H14N2O2	Carboxylic acids and derivatives	130236776
Neg_27039	Negative	10.2344	229.145	Dodecanedioic Acid	[M-H]-	C12H22O4	Medium-chain fatty acids	458573632
Pos_26326	Positive	9.89847	195.138	Dodecatrienoic Acid	[M+H]+	C12H18O2	Fatty Acyls	2652152064
Pos_35339	Positive	13.4024	282.279	Dodemorph	[M+H]+	C18H35NO	Morpholines	131591552
Pos_05383	Positive	1.8101	198.076	DOPA	[M+H]+	C9H11NO4	Amino acids and derivatives	475349280
Pos_13324	Positive	6.59747	276.123	Dubinidine	[M+H]+	C15H17NO4	Dihydrofuranoquinolines	2210514432
Pos_04330	Positive	1.43482	186.112	Ecgonine	[M+H]+	C9H15NO3	Tropane alkaloids	511236288
Pos_04395	Positive	1.46265	143.081	Ectoine	[M+H]+	C6H10N2O2	Amino acids and derivatives	1188197888
Pos_25347	Positive	9.55038	233.117	Encecalin	[M+H]+	C14H16O3	2,2-dimethyl-1-benzopyrans	1438176256
Pos_26578	Positive	10.0098	209.154	Eremopetasinorol	[M+H]+	C13H20O2	Organooxygen compounds	1958434304
Neg_05330	Negative	1.32427	185.045	Erinapyrone C	[M-H]-	C8H10O5	Pyrans	296595552
Pos_19280	Positive	7.91935	289.071	Eriodictyol	[M+H]+	C15H12O6	Flavanones	1156490496
Pos_30642	Positive	11.8601	313.143	Eriosematin	[M+H]+	C19H20O4	Pyranochromenes	168696240
Pos_33786	Positive	13.0094	338.342	Erucamide	[M+H]+	C22H43NO	Fatty amides	1217079808
Pos_12038	Positive	6.1792	142.086	Ethosuximide	[M+H]+	C7H11NO2	Pyrrolidine-2-ones	1247189120
Neg_14207	Negative	6.8134	293.124	Ethyl (S)-3-Hydroxybutyrate Glucoside	[M-H]-	C12H22O8	Fatty Acyls	327320480
Pos_15525	Positive	7.18163	244.094	Ethyl 2-[(3-Methylphenyl)Carbonylamino]Acetate	[M+Na]+	C12H15NO3	Benzamides	2308475392
Pos_19938	Positive	8.03083	141.055	Ethyl Maltol	[M+H]+	C7H8O3	Pyranones and derivatives	458228640
Pos_16166	Positive	7.3209	197.081	Ethyl Orsellinate	[M+H]+	C10H12O4	Benzoic acid esters	2017855872
Neg_17357	Negative	7.78917	195.066	Ethyl Vanillate	[M-H]-	C10H12O4	Methoxybenzoic acids and derivatives	471016960
Neg_19941	Negative	8.4611	269.175	Ethylene Brassylate	[M-H]-	C15H26O4	Macrolides and analogues	244529728
Neg_04666	Negative	1.08703	221.067	Ethylglucuronide	[M-H]-	C8H14O7	Sugar acids and derivatives	243769456
Pos_21491	Positive	8.37948	409.162	Eudesmin	[M+Na]+	C22H26O6	Furanoid lignans	583542592
Pos_04074	Positive	1.3374	319.167	Exemestane	[M+Na]+	C20H24O2	Androgens and derivatives	336411776
Neg_27810	Negative	10.5128	395.209	FA 18:0+2O+SO4	[M-H]-	C18H36O7S	Oxidized fatty acids-sulfate conjugate	289017440
Neg_25068	Negative	9.6624	327.216	FA 18:2+3O	[M-H]-	C18H32O5	Oxidized fatty acids	10321855488
Neg_29361	Negative	11.0557	309.207	FA 18:3;O2	[M-H]-	C18H30O4	Oxidized fatty acids	2351813888
Neg_29358	Negative	11.0557	305.175	FA 18:5+2O	[M-H]-	C18H26O4	Oxidized fatty acids	987920192
Neg_27649	Negative	10.4571	173.118	FA 9:0+1O	[M-H]-	C9H18O3	Oxidized fatty acids	1222557440
Neg_27611	Negative	10.4432	169.086	FA 9:2+1O	[M-H]-	C9H14O3	Oxidized fatty acids	1878952064
Pos_14492	Positive	6.95922	177.054	Ferulic Acid	[M-H2O+H]+	C10H10O4	Hydroxycinnamic acids	438508064
Neg_16314	Negative	7.45497	281.065	Feruloyl Lactate	[M-H]-	C13H14O7	Ferulic acid and derivatives	533367552
Neg_14766	Negative	6.99483	367.103	Feruloyl Quinic Acid	[M-H]-	C17H20O9	Quinic acids and derivatives	1006114112
Pos_23939	Positive	9.09043	314.139	Feruloyltyramine	[M+H]+	C18H19NO4	Methoxyphenols	2466629120
Pos_21002	Positive	8.24002	535.108	Flavone Base + 4O, O-Malonylhex	[M+H]+	C24H22O14	Flavone O-glycosides	1650096256
Neg_25508	Negative	9.78785	331.248	Floionolic Acid	[M-H]-	C18H36O5	Fatty Acyls	551993216
Pos_10512	Positive	5.8166	314.094	Flubendazole	[M+H]+	C16H12FN3O3	Benzophenones	2881027584
Pos_08239	Positive	3.71092	314.094	Flunitrazepam	[M+H]+	C16H12FN3O3	1,4-benzodiazepines	2146183296
Neg_27604	Negative	10.4432	125.022	Fluroxene	[M-H]-	C4H5F3O	Organofluorides	465104032
Pos_19951	Positive	8.03083	412.194	Fluvastatin	[M+H]+	C24H26FNO4	Phenylpyrroles	202159840
Neg_04369	Negative	0.989367	267.072	Fructose Lactate	[M-H]-	C9H16O9	Organooxygen compounds	384983232
Neg_06421	Negative	1.86657	115.004	Fumaric Acid	[M-H]-	C4H4O4	Dicarboxylic acids and derivatives	26397749248
Pos_26847	Positive	10.1211	217.159	Furanodiene	[M+H]+	C15H20O	Germacrane sesquiterpenoids	8929019904
Pos_06366	Positive	2.24025	85.0289	Furanone A	[M+H-H2O]+	C4H4O2	Dihydrofurans	5245988864
Pos_04124	Positive	1.36532	104.071	GABA	[M+H]+	C4H9NO2	Amino acids and derivatives	643073984
Pos_03682	Positive	1.23953	202.069	Galactosamine	[M+Na]+	C6H13NO5	Monosaccharides	78405064
Pos_28024	Positive	10.6218	273.185	Galaxolidone	[M+H]+	C18H24O2	2-benzopyrans	367382112
Neg_10448	Negative	4.93657	169.014	Gallic Acid	[M-H]-	C7H6O5	Hydroxybenzoic acid derivatives	3190868224
Pos_03941	Positive	1.2678	185.044	Gallic Acid Methyl Ester	[M+H]+	C8H8O5	Hydroxybenzoic acid derivatives	294963296
Pos_31124	Positive	12.0971	204.087	Galnac	[M+H-H2O]+	C8H15NO6	Aminosaccharides	4979250688
Pos_05126	Positive	1.74058	146.092	Gamma-Guanidinobutyric Acid	[M+H]+	C5H11N3O2	Amino acids and derivatives	6073021440
Pos_31297	Positive	12.1529	553.277	Ganoderic Acid D2	[M+Na]+	C30H42O8	Triterpenoids	71845232
Pos_29978	Positive	11.5536	415.211	Gelomulide N	[M-H2O+H]+	C24H32O7	Naphthofurans	3128434944
Pos_25134	Positive	9.48067	209.08	Genipin	[M+H-H2O]+	C11H14O5	Iridoids and derivatives	532426240
Pos_21150	Positive	8.28187	433.113	Genistin	[M+H]+	C21H20O10	Isoflavonoid O-glycosides	20080562176
Neg_29183	Negative	10.9862	283.061	Genkwanin	[M-H]-	C16H12O5	7-O-methylated flavonoids	5398931456
Neg_12259	Negative	6.14508	401.109	Gentiopicroside	[M+FA-H]-	C16H20O9	Glycosyl compounds	158917424
Neg_15491	Negative	7.21767	153.019	Gentisic Acid	[M-H]-	C7H6O4	Hydroxybenzoic acid derivatives	2760275200
Pos_28259	Positive	10.7469	197.154	Geranyl Acetate	[M+H]+	C12H20O2	Fatty alcohol esters	489468896
Pos_23887	Positive	9.07655	183.102	Germicidin B	[M+H]+	C10H14O3	Pyranones and derivatives	1132941824
Neg_33279	Negative	12.9039	347.186	Gibberellin A110	[M-H]-	C20H28O5	Prenol lipids	435113984
Pos_04076	Positive	1.3374	333.17	Gibberellin A61	[M+Na]+	C19H24O5	Prenol lipids	142834176
Pos_04689	Positive	1.57385	275.128	Gigantol	[M+H]+	C16H18O4	Stilbenes	420423840
Pos_28428	Positive	10.8303	295.19	Gingerol	[M+H]+	C17H26O4	Gingerols	1792342144
Neg_04258	Negative	0.947483	256.059	Glcnac	[M+Cl]-	C8H15NO6	Aminosaccharides	496500512
Neg_04199	Negative	0.919717	195.051	Gluconic Acid	[M-H]-	C6H12O7	Medium-chain hydroxy acids and derivatives	6147495424
Pos_06043	Positive	2.05985	180.087	Glucosamine	[M+H]+	C6H13NO5	Monosaccharides	2763952640
Pos_04261	Positive	1.40697	260.053	Glucosamine 6-Phosphate	[M+H]+	C6H14NO8P	Monosaccharides	626004800
Neg_05851	Negative	1.50528	179.056	Glucose	[M-H]-	C6H12O6	Organooxygen compounds	17400827904
Neg_11227	Negative	5.65863	265.093	Glucose 3-Hydroxybutyrate	[M-H]-	C10H18O8	Organooxygen compounds	2367286272
Neg_04115	Negative	0.877883	146.046	Glutamic Acid	[M-H]-	C5H9NO4	Amino acids and derivatives	169922560
Neg_26496	Negative	10.0671	301.163	Glutaminylarginine	[M-H]-	C11H22N6O4	Carboxylic acids and derivatives	299047808
Pos_12896	Positive	6.47202	261.144	Glutamylleucine	[M+H]+	C11H20N2O5	Peptides	369564256
Neg_11786	Negative	6.00588	131.035	Glutaric Acid	[M-H]-	C5H8O4	Dicarboxylic acids and derivatives	2259374592
Neg_04153	Negative	0.891833	245.043	Glycerophosphoglycerol	[M-H]-	C6H15O8P	Organic phosphoric acids and derivatives	2283779840
Pos_11698	Positive	6.06777	189.123	Glycylleucine	[M+H]+	C8H16N2O3	Peptides	842064000
Pos_12306	Positive	6.27677	223.108	Glycyl-L-Phenylalanine	[M+H]+	C11H14N2O3	Peptides	319346016
Pos_22803	Positive	8.72783	455.204	Grandisin	[M+Na]+	C24H32O7	7,7'-epoxylignans	932127616
Neg_29392	Negative	11.0696	353.233	Grayanotoxin	[M-H]-	C20H34O5	Prenol lipids	223488208
Pos_23183	Positive	8.85337	107.049	Guaiacol	[M+H-H2O]+	C7H8O2	Methoxyphenols	517088608
Pos_10623	Positive	5.84447	152.057	Guanine	[M+H]+	C5H5N5O	Purines and purine derivatives	3185549824
Neg_11582	Negative	5.95018	282.084	Guanosine	[M-H]-	C10H13N5O5	Purine nucleosides	483738816
Neg_05015	Negative	1.25448	177.04	Gulonolactone	[M-H]-	C6H10O6	Gamma butyrolactones	996724864
Pos_31066	Positive	12.0552	291.195	H_92_Oxabolone	[M+H]+	C18H26O3	Estrogens and derivatives	856185984
Pos_14862	Positive	7.04267	199.087	Harmanine	[M+H]+	C12H10N2O	Organooxygen compounds	298468384
Pos_16556	Positive	7.40427	213.102	Harmine	[M+H]+	C13H12N2O	Harmala alkaloidsInChIKey	332999136
Pos_11091	Positive	5.94198	144.048	Hemineurine	[M+H]+	C6H9NOS	4,5-disubstituted thiazoles	657114624
Pos_26481	Positive	9.96817	177.055	Herniarin	[M+H]+	C10H8O3	Coumarins and derivatives	509992800
Pos_16316	Positive	7.34867	303.086	Hesperetin	[M+H]+	C16H14O6	4'-O-methylated flavonoids	458482240
Neg_20871	Negative	8.65663	477.103	Hesperetin 7-O-Glucuronide	[M-H]-	C22H22O12	Flavonoids	234430544
Pos_05570	Positive	1.85173	314.082	Hexaconazole	[M+H]+	C14H17Cl2N3O	Chlorobenzenes	2128079360
Pos_27545	Positive	10.4132	287.222	Hexadecanedioic Acid	[M+H]+	C16H30O4	Long-chain fatty acids	285465152
Pos_13278	Positive	6.58348	471.149	Hexopyranose, 2-O-Hexopyranosyl-6-O-[(2E)-3-(4-Hydroxyphenyl)-1-Oxo-2-Propen-1-Yl]-	[M-H2O+H]+	C21H28O13	Hydroxycinnamic acid esters	209277968
Neg_31735	Negative	12.0712	614.331	Hexosyl LPE 16:0	[M-H]-	C27H54NO12P	Monosaccharides	118889976
Neg_29769	Negative	11.2088	636.315	Hexosyl LPE 18:3	[M-H]-	C29H52NO12P	Monosaccharides	174791104
Pos_16232	Positive	7.3348	273.123	H-Glu(Ana)-Oh	[M+H]+	C15H16N2O3	Amino acids and derivatives	458599456
Pos_05076	Positive	1.72673	112.087	Histamine	[M+H]+	C5H9N3	Primary amines	1168518016
Pos_30729	Positive	11.9019	124.087	Histidinol	[M+H-H2O]+	C6H11N3O	Aralkylamines	2410233856
Pos_26981	Positive	10.1769	276.159	Homatropine	[M+H]+	C16H21NO3	Tropane alkaloids	1548145024
Pos_25450	Positive	9.57827	303.086	Homoeriodictyol	[M+H]+	C16H14O6	3'-O-methylated flavonoids	549392320
Pos_04817	Positive	1.64328	130.086	Homoproline	[M+H]+	C6H11NO2	Pyrrolidines	9823227904
Pos_11000	Positive	5.91418	158.118	Homostachydrine	[M+H]+	C8H15NO2	Amino acids and derivatives	675776832
Pos_14038	Positive	6.83405	166.123	Hordenine	[M+H]+	C10H15NO	Phenethylamines	404500704
Pos_27571	Positive	10.4271	243.149	Huperzine A	[M+H]+	C15H18N2O	Quinolones and derivatives	729259712
Pos_12983	Positive	6.4999	222.112	Hydrocotarnine	[M+H]+	C12H15NO3	Tetrahydroisoquinolines	241770736
Neg_04048	Negative	0.836167	118.05	Hydroxyethyl Glycine	[M-H]-	C4H9NO3	Carboxylic acids and derivatives	121535688
Neg_04880	Negative	1.19865	103.004	Hydroxypyruvic Acid	[M-H]-	C3H4O4	Beta hydroxy acids and derivatives	12183174144
Neg_18152	Negative	7.97117	189.077	Hydroxysuberic Acid	[M-H]-	C8H14O5	Dicarboxy fatty acids	1902743552
Pos_21186	Positive	8.29577	153.055	Hydroxytoluic Acid	[M+H]+	C8H8O3	Hydroxybenzoic acid derivatives	3918389248
Neg_28353	Negative	10.6938	373.092	Hymenoxin	[M-H]-	C19H18O8	Flavonoids	252490320
Neg_16315	Negative	7.45497	281.139	Hymenoxon	[M-H2O-H]-	C15H22O5	Oxanes	664007936
Pos_16099	Positive	7.30688	312.157	Hyoscyamine	[M+Na]+	C17H23NO3	Tropane alkaloids	979261888
Neg_21579	Negative	8.81035	503.077	Hypericin	[M-H]-	C30H16O8	Benzopyrenes	121158600
Pos_07196	Positive	2.78125	137.046	Hypoxanthine	[M+H]+	C5H4N4O	Purinones	3798683136
Pos_17578	Positive	7.59912	434.202	Icariside D1	[M+NH4]+	C19H28O10	Glycosyl compounds	168102368
Neg_14718	Negative	6.98093	447.151	Icariside F2	[M+FA-H]-	C18H26O10	Alkyl benzyl hexosides	211667872
Pos_25832	Positive	9.71752	275.162	Ilicic Acid	[M+Na]+	C15H24O3	Eudesmane, isoeudesmane or cycloeudesmane sesquiterpenoids	421538048
Pos_24314	Positive	9.22998	119.086	Indane	[M+H]+	C9H10	Indanes	644864384
Pos_19784	Positive	8.00295	133.065	Indanone	[M+H]+	C9H8O	Indanes	992658432
Neg_19626	Negative	8.37713	174.056	Indole-3-Acetic Acid	[M-H]-	C10H9NO2	Indole-3-acetic acid derivatives	223617920
Pos_14088	Positive	6.84795	247.108	Indole-3-Acetyl-Alanine	[M+H]+	C13H14N2O3	Amino acids and derivatives	365149856
Pos_12547	Positive	6.36057	170.06	Indole-3-Acrylic Acid	[M+H-H2O]+	C11H9NO2	Indoles	176978816
Pos_24376	Positive	9.2439	162.091	Indole-3-Ethanol	[M+H]+	C10H11NO	3-alkylindoles	823575040
Pos_21341	Positive	8.33763	176.071	Indole-3-Glycol Aldehyde	[M+CH3OH+H]+	C10H9NO2	Indoles and derivatives	417991264
Pos_12548	Positive	6.36057	188.07	Indole-3-Lactic Acid	[M+H-H2O]+	C11H11NO3	Indolyl carboxylic acids and derivatives	21058551808
Neg_12749	Negative	6.32603	308.078	Indoxyl Glucuronide	[M-H]-	C14H15NO7	Sugar acids and derivatives	751332480
Pos_14937	Positive	7.05662	411.214	Ingenol-5,20-Acetonide	[M+Na]+	C23H32O5	Ketals	159132080
Neg_04794	Negative	1.15687	267.074	Inosine	[M-H]-	C10H12N4O5	Purine nucleosides	1052953664
Pos_22811	Positive	8.72783	523.145	Iridin	[M+H]+	C24H26O13	Isoflavonoid O-glycosides	9781684224
Neg_22505	Negative	9.04797	435.093	Irisxanthone	[M-H]-	C20H20O11	Dibenzopyrans	906368256
Pos_28607	Positive	10.8998	233.154	Isoalantolactone	[M+H]+	C15H20O2	Sesquiterpene lactones	6900143104
Neg_13066	Negative	6.42375	323.129	Isobavachin	[M-H]-	C20H20O4	8-prenylated flavans	501579584
Pos_04489	Positive	1.50432	257.151	Isocurcumenol	[M+Na]+	C15H22O2	Guaianes	349344704
Pos_17196	Positive	7.52955	177.054	Isoferulic Acid	[M+H-H2O]+	C10H10O4	Hydroxycinnamic acids	715318720
Neg_20622	Negative	8.60067	221.046	Isofraxidin	[M-H]-	C11H10O5	7-hydroxycoumarins	981867328
Pos_11432	Positive	5.99795	120.081	Isoindoline	[M+NH4]+	C8H9N	Isoindoles and derivatives	35883749376
Pos_28096	Positive	10.6634	223.169	Isokobusone	[M+NH4]+	C14H22O2	Cyclic alcohols and derivatives	1668048256
Pos_14929	Positive	7.05662	245.186	Isoleucylleucine	[M+H]+	C12H24N2O3	Peptides	1809334400
Neg_15422	Negative	7.18993	449.109	Isookaninglucoside	[M-H]-	C21H22O11	Flavonoid O-glycosides	181091696
Pos_06523	Positive	2.33728	247.06	Isopimpinellin	[M+H]+	C13H10O5	Linear furanocoumarins	2589260032
Neg_04197	Negative	0.919717	187.04	Isoplumbagin	[M-H2O-H]-	C11H8O3	Naphthalenes	353462848
Pos_20986	Positive	8.24002	255.084	Isopropyl Thioxanthone	[M+H]+	C16H14OS	Thiochromenes	286799136
Pos_24138	Positive	9.16042	447.129	Isoprunetin 7-O-Glucoside	[M+H]+	C22H22O10	Isoflavonoid O-glycosides	35488604160
Pos_19050	Positive	7.87757	465.103	Isoquercitrin	[M+H]+	C21H20O12	Flavonoid O-glycosides	355038720
Pos_20171	Positive	8.07282	479.118	Isorhamnetin 3-Galactoside	[M+H]+	C22H22O12	Flavonoid O-glycosides	268298672
Pos_20944	Positive	8.22605	479.118	Isorhamnetin 3-Glucoside	[M+H]+	C22H22O12	Flavonoid O-glycosides	355906688
Pos_20030	Positive	8.04483	579.171	Isorhoifolin	[M+H]+	C27H30O14	Flavonoids	1620382592
Pos_30683	Positive	11.8741	347.185	Isorosmanol	[M+H]+	C20H26O5	Diterpene lactones	645084992
Pos_28269	Positive	10.7469	361.092	Isothymonin	[M+CH3OH+H]+	C18H16O8	7-O-methylated flavonoids	490681216
Pos_18571	Positive	7.79395	433.113	Isovitexin	[M+H]+	C21H20O10	Flavonoid C-glycosides	379267968
Pos_11198	Positive	5.95588	302.175	Isoxsuprine	[M+H]+	C18H23NO3	Phenylpropanes	1618335488
Neg_10685	Negative	5.15877	129.019	Itaconic Acid	[M-H]-	C5H6O4	Branched fatty acids	2396308992
Pos_27231	Positive	10.2881	361.092	Jaceidin	[M+H]+	C18H16O8	6-O-methylated flavonoids	9519823872
Pos_25763	Positive	9.68962	221.189	Jaeschkeanadiol	[M-H2O+H]+	C15H26O2	Sesquiterpenoids	1289262976
Pos_24425	Positive	9.25782	169.122	Jasmine Lactone	[M+H]+	C10H16O2	Delta valerolactones	1228171520
Pos_27570	Positive	10.4271	211.133	Jasmonic Acid	[M+H]+	C12H18O3	Jasmonic acids	2008496512
Neg_20465	Negative	8.5728	285.04	Kaempferol	[M-H]-	C15H10O6	Flavonols	888254720
Neg_17848	Negative	7.90127	461.073	Kaempferol 3-Glucuronide	[M-H]-	C21H18O12	Flavonoid O-glycosides	1148636416
Pos_19644	Positive	7.97503	595.166	Kaempferol 3-O-Rutinoside	[M+H]+	C27H30O15	Flavonoid O-glycosides	65847840
Neg_18788	Negative	8.15293	447.093	Kaempferol 7-O-Glucoside	[M]-	C21H19O11	Flavonoid O-glycosides	349540032
Pos_13742	Positive	6.73652	236.089	Kainic Acid	[M+Na]+	C10H15NO4	Amino acids and derivatives	468174592
Pos_30813	Positive	11.9437	213.091	Kawain	[M+H-H2O]+	C14H14O3	Kavalactones	555928448
Pos_28113	Positive	10.6634	531.156	Ketoconazole	[M+H]+	C26H28Cl2N4O4	Phenylpiperazines	2784988416
Pos_07522	Positive	3.04513	238.07	Kinetin	[M+Na]+	C10H9N5O	6-aminopurines	260403840
Pos_13184	Positive	6.55572	143.034	Kojic Acid	[M+H]+	C6H6O4	Pyranones and derivatives	11484318720
Pos_11466	Positive	5.99795	531.318	Kukoamine B	[M+H]+	C28H42N4O6	Catechols	1173675136
Pos_13818	Positive	6.7644	190.05	Kynurenic Acid	[M+H]+	C10H7NO3	Quinoline carboxylic acids	831401344
Pos_11782	Positive	6.0958	209.092	Kynurenine	[M+H]+	C10H12N2O3	Ketones	360435168
Pos_11696	Positive	6.06777	169.097	L,L-Cyclo(Prolylalanyl)	[M+H]+	C8H12N2O2	Carboxylic acids and derivatives	729184000
Pos_36768	Positive	13.8458	102.055	L-3-Aminodihydro-2(3H)-Furanone	[M+NH4]+	C4H7NO2	Carboxylic acids and derivatives	370640448
Pos_04708	Positive	1.58775	325.113	Lactulose	[M+H-H2O]+	C12H22O11	Glycosyl compounds	731447232
Pos_26259	Positive	9.88458	230.248	Lauramine Oxide	[M+H]+	C14H31NO	Long-chain alkyl amine oxides	949742144
Pos_34356	Positive	13.1786	363.31	Laureth-4	[M+H]+	C20H42O5	Dialkyl ethers	181426368
Pos_26110	Positive	9.82887	274.274	Lauryldiethanolamine	[M+H]+	C16H35NO2	Alkanolamines	4291312128
Pos_04255	Positive	1.40697	146.082	L-Cis-4-(Hydroxymethyl)-2-Pyrrolidinecarboxylic Acid	[M+H]+	C6H11NO3	Carboxylic acids and derivatives	1705824000
Neg_05824	Negative	1.49135	119.034	L-Erythrulose	[M-H]-	C4H8O4	Organooxygen compounds	2345024512
Pos_10436	Positive	5.7888	132.102	Leucine	[M+H]+	C6H13NO2	Amino acids and derivatives	1277963648
Neg_20682	Negative	8.61467	131.071	Leucinic Acid	[M-H]-	C6H12O3	Fatty Acyls	1269742848
Pos_10628	Positive	5.84447	203.139	Leucylalanine	[M+H]+	C9H18N2O3	Peptides	530940608
Pos_10711	Positive	5.85835	189.123	Leucylglycine	[M+H]+	C8H16N2O3	Peptides	828895488
Pos_16169	Positive	7.3209	279.17	Leucylphenylalanine	[M+H]+	C15H22N2O3	Peptides	684758208
Pos_14091	Positive	6.84795	302.207	Leu-Gly-Leu	[M+H]+	C14H27N3O4	Peptides	344207616
Pos_12639	Positive	6.38843	184.097	Levonordefrin	[M+H]+	C9H13NO3	Benzene and substituted derivatives	1193073408
Pos_12014	Positive	6.1653	349.141	Licarin A	[M+Na]+	C20H22O4	2-arylbenzofuran flavonoids	180198560
Pos_13912	Positive	6.79223	433.134	Licoagroside B	[M+H]+	C18H24O12	Saccharolipids	3142572288
Neg_14761	Negative	6.99483	239.056	Lignicol	[M-H]-	C11H12O6	Hydroxybenzoic acid derivatives	473989760
Pos_15056	Positive	7.08445	191.107	Ligustilide	[M+H]+	C12H14O2	Isobenzofurans	556763776
Pos_18505	Positive	7.78005	225.112	Ligustilidiol	[M+H]+	C12H16O4	Isobenzofurans	222850000
Pos_21938	Positive	8.49093	509.13	Limocitrin 3-Glucoside	[M+H]+	C23H24O13	Isoflavonoids	181114704
Pos_28711	Positive	10.9414	219.136	Linalyl Acetate	[M+Na]+	C12H20O2	Acyclic monoterpenoids	852814528
Pos_04259	Positive	1.40697	231.138	Lindenenol	[M+H]+	C15H18O2	Naphthofurans	2298178816
Pos_28526	Positive	10.872	245.117	Linderalactone	[M+H]+	C15H16O3	Butenolides	1935846144
Pos_33189	Positive	12.8125	324.29	Linoleoyl Ethanolamide	[M+H]+	C20H37NO2	Carboximidic acids and derivatives	198197104
Neg_26988	Negative	10.2205	255.066	Liquiritigenin	[M-H]-	C15H12O4	Flavanones	104916880
Pos_17086	Positive	7.50168	318.181	L-Isoleucyl-L-Tryptophan	[M+H]+	C17H23N3O3	Peptides	196282160
Pos_22878	Positive	8.75565	197.117	Loliolide	[M+H]+	C11H16O3	Benzofurans	25898053632
Pos_04404	Positive	1.46265	229.129	L-Ornithine	[M+H]+	C9H16N4O3	Amino acids and derivatives	757637568
Neg_31617	Negative	12.0294	564.33	LPC 18:2	[M-H]-	C35H43N5O2	LysoPC	666346880
Pos_29738	Positive	11.4279	468.308	LPC(14:0)	[M+H]+	C22H46NO7P	Lysophosphatidylcholines	223040192
Pos_30825	Positive	11.9437	482.324	LPC(15:0)	[M+H]+	C23H48NO7P	Lysophosphatidylcholines	348890336
Pos_31851	Positive	12.3628	496.34	LPC(16:0)	[M+H]+	C24H50NO7P	Glycerophospholipids	9287328768
Pos_30352	Positive	11.707	494.325	LPC(16:1)	[M+NH4]+	C24H48NO7P	Glycerophospholipids	447654240
Pos_32498	Positive	12.5737	522.356	LPC(18:1)	[M+Na]+	C26H52NO7P	Glycerophospholipids	1228783360
Pos_29872	Positive	11.4977	518.325	LPC(18:3)	[M+H]+	C26H48NO7P	Lysophosphatidylcholines	18933211136
Pos_31013	Positive	12.0273	542.325	LPC(20:5)	[2M+H]+	C28H48NO7P	Glycerophospholipids	401393632
Pos_31680	Positive	12.3067	454.293	LPE(16:0)	[M+H]+	C21H44NO7P	Lysophosphatidylethanolamines	869500672
Neg_31512	Negative	11.9876	476.278	LPE(18:2)	[M-H]-	C23H44NO7P	Lysophosphatidylethanolamines	954562944
Neg_30018	Negative	11.32	474.261	LPE(18:3)	[M]-	C23H41NO7P	Lineolic acids and derivatives	87131344
Neg_30191	Negative	11.3896	595.289	LPI(18:2)	[2M-H]-	C27H49O12P	Lysophosphatidylinositols	285509760
Neg_13695	Negative	6.66018	241.073	Lumichrome	[M-H]-	C12H10N4O2	Flavins	476536000
Pos_18958	Positive	7.86367	287.055	Luteolin	[M+H]+	C15H10O6	Flavones	1410250752
Pos_13293	Positive	6.58348	611.161	Luteolin 6-C-Glucoside 8-C-Arabinoside	[M+H]+	C27H30O16	Flavonoid C-glycosides	64080820
Neg_17709	Negative	7.87325	447.093	Luteolin 7-Glucoside	[M-H]-	C21H20O11	Flavonoid O-glycosides	3102976512
Pos_19048	Positive	7.87757	463.087	Luteolin-7-Glucuronide	[M+H]+	C21H18O12	Flavonoid O-glycosides	1351960576
Pos_29400	Positive	11.2748	251.164	Lychnopholic Acid	[M+H]+	C15H22O3	Sesquiterpenoids	4139441664
Pos_17003	Positive	7.48773	300.181	Lycopsamine	[M+H]+	C15H25NO5	Alkaloids and derivatives	250376928
Pos_07431	Positive	2.96183	260.197	Lys-Leu	[M+H]+	C12H25N3O3	Peptides	359112352
Pos_14935	Positive	7.05662	342.172	Magnoflorine	[M+CH3OH+H]+	C20H24NO4	Aporphines	264999312
Pos_16172	Positive	7.3209	289.12	Magnolol	[M+Na]+	C18H18O2	Biphenyls and derivatives	431394912
Neg_05417	Negative	1.35207	115.004	Maleic Acid	[M-H]-	C4H4O4	Dicarboxylic acids and derivatives	1689981440
Neg_04703	Negative	1.11502	133.014	Malic Acid	[M-H]-	C4H6O5	Beta hydroxy acids and derivatives	52317630464
Pos_04488	Positive	1.50432	248.113	Malonylcarnitine	[M+H]+	C10H17NO6	Fatty Acyls	283980672
Pos_22455	Positive	8.63028	519.113	Malonylgenistin	[M+H]+	C24H22O13	Isoflavonoid O-glycosides	8608612352
Pos_24907	Positive	9.41097	533.129	Malonylglycitin	[M+H]+	C25H24O13	Isoflavonoid O-glycosides	17967245312
Pos_20988	Positive	8.24002	291.098	Malonyltryptophan	[M+H]+	C14H14N2O5	Amino acids and derivatives	1422953472
Pos_10801	Positive	5.87228	180.102	Maltoxazine	[M+H-H2O]+	C10H13NO2	Pyrrolidines	3219180544
Pos_13400	Positive	6.62525	204.087	Mannac	[M+H-H2O]+	C8H15NO6	Aminosaccharides	608656384
Pos_03891	Positive	1.25388	162.076	Mannosamine	[M-H2O+H]+	C6H13NO5	Monosaccharides	95916968
Pos_06042	Positive	2.05985	163.06	Mannose	[M+H-H2O]+	C6H12O6	Monosaccharides	1986708608
Neg_16867	Negative	7.63595	449.109	Marein	[M-H]-	C21H22O11	Flavonoid O-glycosides	192694032
Neg_18614	Negative	8.11097	163.04	M-Coumaric Acid	[M-H]-	C9H8O3	Hydroxycinnamic acids	9648248832
Pos_12210	Positive	6.24887	127.073	Melamine	[M+H]+	C3H6N6	1,3,5-triazines	576697920
Pos_05094	Positive	1.72673	543.132	Melezitose	[M+K]+	C18H32O16	Oligosaccharides	1076686080
Pos_04497	Positive	1.50432	365.105	Melibiose	[M+Na]+	C12H22O11	O-glycosyl compounds	4192499712
Neg_12993	Negative	6.39567	371.098	Melilotoside	[M+FA-H]-	C15H18O8	Glycosyl compounds	846575744
Neg_22108	Negative	8.95007	315.181	Menthol-Glucoronide	[M-H]-	C16H28O6	Prenol lipids	449866944
Pos_19630	Positive	7.97503	317.079	Meranzin Hydrate	[M+K]+	C15H18O5	Coumarins and derivatives	282615488
Neg_06256	Negative	1.75542	129.019	Mesaconic Acid	[M-H]-	C5H6O4	Branched fatty acids	2865063168
Pos_15205	Positive	7.1122	154.05	Mesalamine	[M+H]+	C7H7NO3	Aminobenzoic acids and derivatives	1131079424
Pos_08965	Positive	4.2928	310.217	Methadone	[M+H]+	C21H27NO	Diphenylmethanes	450680576
Pos_05330	Positive	1.79618	150.058	Methionine	[M+H]+	C5H11NO2S	Amino acids and derivatives	575295488
Neg_05845	Negative	1.50528	89.0239	Methoxyacetic Acid	[M-H]-	C3H6O3	Carboxylic acids and derivatives	32753272832
Neg_16169	Negative	7.39922	210.077	Methoxytyrosine	[M-H]-	C10H13NO4	Tyrosine and derivatives	1823449600
Pos_16159	Positive	7.3209	158.118	Methyl 1-Methylpiperidine-3-Carboxylate	[M+H]+	C8H15NO2	Piperidines	642095936
Pos_11443	Positive	5.99795	254.136	Methyl 2-[(2-Hydroxy-3-Methylbutanoyl)Amino]-3-Methylbutanoate	[M+Na]+	C11H21NO4	Amino acids and derivatives	1062586240
Neg_07411	Negative	2.50528	125.024	Methyl 2-Furoate	[M-H]-	C6H6O3	Furans	1285744000
Neg_17156	Negative	7.70565	367.103	Methyl Chlorogenate	[M-H]-	C17H20O9	Cyclic alcohols and derivatives	897739136
Pos_20255	Positive	8.08673	163.075	Methyl Cinnamate	[M+CH3OH+H]+	C10H10O2	Cinnamic acids and derivatives	6052378624
Pos_19793	Positive	8.00295	193.086	Methyl Trans-P-Methoxycinnamate	[M+CH3OH+H]+	C11H12O3	Cinnamic acids and derivatives	14659911680
Pos_26478	Positive	9.96817	121.102	M-Ethyl_Toluene	[M+H]+	C9H12	Benzene and substituted derivatives	1325745408
Pos_16369	Positive	7.36258	212.092	Methyldopa	[M+H]+	C10H13NO4	Phenylpropanoic acids	545466880
Pos_06369	Positive	2.24025	133.05	Methylsuccinic Acid	[M+H]+	C5H8O4	Branched fatty acids	1651429376
Pos_12141	Positive	6.22115	298.097	Methylthioadenosine	[M+H]+	C11H15N5O3S	5'-deoxy-5'-thionucleosides	458035296
Pos_10386	Positive	5.7749	131.07	Mevalonolactone	[M+H]+	C6H10O3	Delta valerolactone	681561344
Neg_31863	Negative	12.1406	559.312	MGMG(18:3/0:0)	[M+FA-H]-	C27H46O9	Glycosylmonoradylglycerols	105412880
Pos_11445	Positive	5.99795	266.165	Mirtazapine	[M+H]+	C17H19N3	Piperazinoazepines	1499762560
Neg_18036	Negative	7.94328	449.109	Miscanthoside	[M-H]-	C21H22O11	Flavonoid O-glycosides	2038629120
Pos_12754	Positive	6.43027	207.149	Monoethylglycinexylidide	[M+H]+	C12H18N2O	Amino acids and derivatives	5460841984
Pos_05559	Positive	1.85173	172.119	Moroxydine	[M+H]+	C6H13N5O	Biguanides	636260672
Pos_08091	Positive	3.60007	136.076	M-Toluamide	[M+NH4]+	C8H9NO	Benzene and substituted derivatives	2418374656
Pos_04095	Positive	1.35137	252.108	Muramic Acid	[M+H]+	C9H17NO7	Sugar acids and derivatives	610646656
Pos_21568	Positive	8.3934	411.178	Mycophenolic Acid IV	[M+Na]+	C22H28O6	Terpene lactones	705056000
Neg_04361	Negative	0.989367	179.056	Myoinositol	[M-H]-	C6H12O6	Organooxygen compounds	17526573056
Neg_18291	Negative	8.01295	463.088	Myricitrine	[M-H]-	C21H20O12	Flavonoid O-glycosides	6653401600
Pos_24227	Positive	9.20218	151.112	Myrtenal	[M+H]+	C10H14O	Bicyclic monoterpenoids	843879360
Pos_18142	Positive	7.7104	362.195	N-(((1S,9Ar)-Octahydro-1H-Quinolizin-1-Yl)Methyl)-5-(Pyridin-3-Yl)-1H-Pyrazole-3-Carboxamide	[M+Na]+	C19H25N5O	Pyrazolylpyridines	200760832
Pos_28156	Positive	10.6913	403.202	N-((1S)-1-(((2S)-1-Hydroxy-3-Phenyl-Propan-2-Yl)Carbamoyl)-2-Phenyl-Ethyl)Benzamide	[M+H]+	C25H26N2O3	Amino acids and derivatives	1435525632
Pos_11552	Positive	6.02583	164.107	N-(2,4-Dimethylphenyl)Acetamide	[M+H]+	C10H13NO	Acetanilides	475393056
Pos_12172	Positive	6.235	156.065	N-(2,5-Dioxocyclopentyl)Acetamide	[M+H]+	C7H9NO3	1,3-dicarbonyl compounds	605436480
Neg_13386	Negative	6.54897	144.066	N-(2-Carboxymethyl)-Morpholine	[M-H]-	C6H11NO3	Carboxylic acids and derivatives	963261568
Pos_10888	Positive	5.88627	283.142	N-(2-Indol-3-Ylethyl)(2-Methylpropoxy)Carboxamide	[M+Na]+	C15H20N2O2	3-alkylindoles	4385893888
Pos_13086	Positive	6.52775	202.109	N-(4-Methylquinazolin-2-Yl)Guanidine	[M+H]+	C10H11N5	Quinazolines	754709632
Pos_12074	Positive	6.19327	229.155	N,N,N-Trimethyl-L-Alanyl-L-Proline Betaine	[M+NH4]+	C11H20N2O3	Carboxylic acids and derivatives	8360304128
Pos_04331	Positive	1.43482	203.15	N,N-Dimethylarginine	[M+H]+	C8H18N4O2	Amino acids and derivatives	406882432
Pos_12674	Positive	6.40242	276.121	N-[1-(4-Methoxy-6-Oxopyran-2-Yl)-2-Methylbutyl]Acetamide	[M+Na]+	C13H19NO4	Pyranones and derivatives	1044825792
Pos_10896	Positive	5.88627	312.144	N-[4,5-Dihydroxy-6-(Hydroxymethyl)-2-(Phenylmethoxy)-2H-3,4,5,6-Tetrahydropyra N-3-Yl]Acetamide	[M+H]+	C15H21NO6	Aminosaccharides	934721408
Pos_24920	Positive	9.41097	787.37	N1,N5,N10,N14-Tetra-Trans-P-Coumaroylspermine	[M+H]+	C46H50N4O8	Coumaric acids and derivatives	428892384
Neg_10688	Negative	5.15877	215.103	N2,N5-Diacetylornithine	[M-H]-	C9H16N2O4	Carboxylic acids and derivatives	397340896
Pos_11705	Positive	6.06777	267.134	N5-(4-Methoxybenzyl)Glutamine	[M+H-H2O]+	C13H18N2O4	Carboxylic acids and derivatives	317274880
Pos_12439	Positive	6.31872	380.133	N6-Benzyladenosine	[M+Na]+	C17H19N5O4	Purine nucleosides	443621248
Pos_23218	Positive	8.86732	164.107	N-Acetyl-2-Phenylethylamine	[M+H]+	C10H13NO	Carboxylic acid amides	471153664
Neg_30282	Negative	11.4314	194.082	N-Acetyldopamine	[M-H]-	C10H13NO3	Phenols	220992128
Pos_05999	Positive	2.046	190.071	N-Acetylglutamic Acid	[M+H]+	C7H11NO5	Amino acids and derivatives	2210273024
Pos_05442	Positive	1.82397	154.097	N-Acetylhistamine	[M+H]+	C7H11N3O	Carboxylic acid amides	1085514368
Pos_13359	Positive	6.61137	172.097	N-Acetylhomoproline	[M+H]+	C8H13NO3	N-acylpyrrolidines	997954560
Neg_17011	Negative	7.67783	172.097	N-Acetylisoleucine	[M-H]-	C8H15NO3	Carboxylic acids and derivatives	1506616064
Pos_20984	Positive	8.24002	208.097	N-Acetylphenylalanine	[M+H]+	C11H13NO3	Amino acids and derivatives	295482240
Pos_12099	Positive	6.20722	158.081	N-Acetylproline	[M+H]+	C7H11NO3	Amino acids and derivatives	5953400320
Pos_04699	Positive	1.58775	131.118	N-Acetylputrescine	[M+H]+	C6H14N2O	Carboximidic acids	570603264
Neg_05762	Negative	1.46342	160.062	N-Acetylthreonine	[M-H]-	C6H11NO4	Amino acids and derivatives	409426784
Neg_19143	Negative	8.26487	245.093	N-Acetyltryptophan	[M-H]-	C13H14N2O3	Amino acids and derivatives	4755954176
Neg_14110	Negative	6.78552	158.082	N-Acetylvaline	[M-H]-	C7H13NO3	Carboxylic acids and derivatives	1071661824
Pos_27137	Positive	10.2464	255.074	Nalidixic Acid	[M+Na]+	C12H12N2O3	Naphthyridine carboxylic acids and derivatives	798872704
Pos_33927	Positive	13.0376	398.23	Napelline N-Oxide	[M+Na]+	C22H33NO4	Kaurane diterpenoids	114209192
Pos_28288	Positive	10.7607	231.102	Naproxen	[M+H]+	C14H14O3	Naphthalenes	3190786048
Neg_18437	Negative	8.0548	623.162	Narcissin	[M-H]-	C28H32O16	Flavonoid O-glycosides	43648440
Neg_20009	Negative	8.47498	447.093	Naringenin-7-O-Glucuronide	[M-H]-	C21H20O11	Flavonoids	218373424
Pos_12603	Positive	6.37443	252.087	N-Benzoyl-L-Glutamic Acid	[M+H]+	C12H13NO5	Amino acids and derivatives	595812544
Pos_29701	Positive	11.414	445.212	N-Benzoylphenylalanylphenylalinol Acetate	[M+H]+	C27H28N2O4	Amino acids and derivatives	3199363328
Neg_12291	Negative	6.159	222.077	N-Benzylaspartic Acid	[M-H]-	C11H13NO4	Amino acids and derivatives	337617344
Pos_36684	Positive	13.8043	172.097	N-Butyrylhomoserine Lactone	[M+H]+	C8H13NO3	Amino acids and derivatives	541063104
Pos_13835	Positive	6.7644	407.239	N-Deoxyfructosylleucylisoleucine	[M+H]+	C18H34N2O8	Peptides	342850240
Neg_08711	Negative	3.49137	297.084	Nebularine	[M+FA-H]-	C10H12N4O4	Purine nucleosides	449564896
Pos_26046	Positive	9.801	285.076	Negletein	[M+H]+	C16H12O5	7-O-methylated flavonoids	536230272
Pos_20689	Positive	8.17037	609.181	Neodiosmin	[M+H]+	C28H32O15	Flavonoid O-glycosides	1260950400
Pos_25885	Positive	9.7315	573.158	Neolicuroside	[M+Na]+	C26H30O13	Flavonoid O-glycosides	260637488
Pos_36243	Positive	13.5826	200.129	Neotussilagine	[M+Na]+	C10H17NO3	Pyrrolizidines	656341056
Pos_04658	Positive	1.56	175.108	N-Epsilon-Formyl-L-Lysine	[M+H]+	C7H14N2O3	Amino acids and derivatives	3850201856
Neg_10108	Negative	4.6587	292.139	N-Fructosyl Isoleucine	[M-H]-	C12H23NO7	N-Fructosyl amino acids	1767075712
Pos_11571	Positive	6.02583	328.139	N-Fructosyl Phenylalanine	[M+H]+	C15H21NO7	N-Fructosyl amino acids	7623430656
Neg_05588	Negative	1.394	290.088	N-Fructosyl Pyroglutamate	[M-H]-	C11H17NO8	N-Fructosyl amino acids	28977461248
Pos_08416	Positive	3.84947	344.134	N-Fructosyl Tyrosine	[M+H]+	C15H21NO8	N-Fructosyl amino acids	1212996864
Pos_15517	Positive	7.18163	160.076	N-Hydroxy-1-Aminonaphthalene	[M+H]+	C10H9NO	Naphthalenes	1291222400
Pos_05280	Positive	1.78233	124.039	Nicotinic Acid	[M+H]+	C6H5NO2	Pyridinecarboxylic acids	3940368640
Pos_30400	Positive	11.7349	415.211	Niranthin	[M-H2O+H]+	C24H32O7	Dibenzylbutane lignans	1338433408
Neg_24030	Negative	9.3973	311.114	Nivalenol	[M-H]-	C15H20O7	Trichothecenes	206948864
Neg_15164	Negative	7.1341	202.108	N-Lactoylleucine	[M-H]-	C9H17NO4	Carboxylic acids and derivatives	712109184
Neg_08834	Negative	3.6024	188.092	N-Lactoylvaline	[M-H]-	C8H15NO4	Carboxylic acids and derivatives	792199104
Neg_07683	Negative	2.69985	204.087	N-Methylcalystegine C1	[M-H]-	C8H15NO5	Tropane alkaloids	446006528
Pos_11931	Positive	6.13758	146.118	N-Methylisoleucine	[M+H]+	C7H15NO2	Amino acids and derivatives	1719694464
Pos_28912	Positive	11.0525	161.128	N-Methyllysine	[M+H]+	C7H16N2O2	Amino acids and derivatives	571201984
Pos_12593	Positive	6.37443	130.086	N-Methylproline	[M+H]+	C6H11NO2	Amino acids and derivatives	23544963072
Pos_36021	Positive	13.4995	193.05	Noreugenin	[M+Na]+	C10H8O4	Benzopyrans	243403584
Pos_36710	Positive	13.8181	128.107	Norhygrine	[M+H]+	C7H13NO	Organooxygen compounds	1445287424
Pos_29498	Positive	11.3165	312.253	N-Tetradecanoyl-Homoserine Lactone	[M+H]+	C18H33NO3	Amino acids and derivatives	382515200
Pos_15214	Positive	7.1122	304.166	N-Valyltryptophan	[M+H]+	C16H21N3O3	Peptides	204475968
Pos_27750	Positive	10.4967	307.154	Nx2 Toxin	[M-H2O+H]+	C17H24O6	---	1978633088
Pos_15650	Positive	7.20943	261.085	Obtucarbamate A	[M+Na]+	C11H14N2O4	Phenylcarbamic acid esters	232022992
Neg_31535	Negative	12.0015	309.207	Octadeca-2,4-Dienedioic Acid	[M-H]-	C18H30O4	Fatty Acyls	1285906432
Pos_30079	Positive	11.5954	270.315	Octadecylamine	[M+H]+	C18H39N	Primary amines	3479384320
Pos_17817	Positive	7.64083	347.185	Oridonin	[M+H-H2O]+	C20H28O6	Kaurane diterpenoids	306625696
Pos_15652	Positive	7.20943	301.116	Oxadixyl	[M+Na]+	C14H18N2O4	Anilides	4058099200
Pos_17441	Positive	7.57128	262.071	Oxolinic Acid	[M+H]+	C13H11NO5	Quinoline carboxylic acids	463188896
Pos_04690	Positive	1.57385	360.15	Palatinose	[M+NH4]+	C12H22O11	Glycosyl compounds	550504192
Pos_15146	Positive	7.09833	138.055	P-Aminobenzoic Acid	[M+H]+	C7H7NO2	Aminobenzoic acids and derivatives	1461166976
Neg_08988	Negative	3.69968	147.066	Pantoic Acid	[M-H]-	C6H12O4	Fatty Acyls	2117726720
Neg_12416	Negative	6.20078	218.103	Pantothenic Acid	[M-H]-	C9H17NO5	Secondary alcohols	1864706176
Pos_28559	Positive	10.8859	249.148	Parthenolide	[M+H]+	C15H20O3	Sesquiterpene lactones	4979866112
Pos_04437	Positive	1.47652	283.167	Patchoulen-Beta	[M+Na]+	C17H24O2	Long-chain fatty alcohols	380960000
Pos_34847	Positive	13.3045	760.585	PC(16:0/18:1)	[M+H]+	C42H82NO8P	Phosphatidylcholines	326884224
Pos_34844	Positive	13.3045	758.569	PC(16:0/18:2)	[M+H]+	C42H80NO8P	Phosphatidylcholines	277585312
Pos_35094	Positive	13.3465	744.591	PC(16:0/P-18:1)	[M+H-H2O]+	C42H82NO7P	Glycerophospholipids	133000536
Pos_32596	Positive	12.6017	786.601	PC(18:0/18:2)	[M+H]+	C44H84NO8P	Phosphatidylcholines	110832608
Pos_34068	Positive	13.0801	732.554	PC(18:1/14:0)	[M+H]+	C40H78NO8P	Phosphatidylcholines	115319408
Pos_34858	Positive	13.3045	784.585	PC(18:1/18:2)	[M+H]+	C44H82NO8P	Phosphatidylcholines	115549648
Pos_34956	Positive	13.3184	782.569	PC(18:2/18:2)	[M+H]+	C44H80NO8P	Glycerophospholipids	72155664
Pos_32642	Positive	12.6157	766.572	PC(O-16:0/20:5)	[M+H]+	C44H81NO7P+	1-alkyl,2-acylglycero-3-phosphocholines	78880160
Pos_20257	Positive	8.08673	165.055	P-Coumaric Acid	[M+H]+	C9H8O3	Cinnamic acids and derivatives	4096481792
Pos_28813	Positive	10.997	375.108	Pebrellin	[M+H]+	C19H18O8	Flavonoids	13512543232
Pos_29432	Positive	11.2887	292.227	Penbutolol	[M+CH3OH+H]+	C18H29NO2	Phenol ethers	451332384
Pos_21709	Positive	8.43517	463.124	Peonidin 3-Glucoside	[M]+	C22H23O11+	Flavonoid O-glycosides	12691151872
Neg_04616	Negative	1.07307	75.0082	Peracetic Acid	[M-H]-	C2H4O3	Carboxylic acids and derivatives	342594688
Pos_20090	Positive	8.05883	265.098	Perlolyrine	[M+H]+	C16H12N2O2	Harmala alkaloids	1063756800
Pos_33899	Positive	13.0234	607.256	Phaeophorbide B	[M+H]+	C35H34N4O6	Tetrapyrroles and derivatives	219699408
Pos_21551	Positive	8.3934	180.102	Phenacetin	[M+H]+	C10H13NO2	Acetanilides	17124089856
Neg_28223	Negative	10.652	349.181	Phenothrin	[M-H]-	C23H26O3	Pyrethroids	1363412224
Pos_33176	Positive	12.8125	121.065	Phenylacetaldehyde	[M+H]+	C8H8O	Phenylacetaldehydes	557824768
Neg_17151	Negative	7.70565	250.071	Phenylacetylaspartic Acid	[M-H]-	C12H13NO5	Aspartic acid and derivatives	1620060928
Pos_11437	Positive	5.99795	166.086	Phenylalanine	[M+H]+	C9H11NO2	Amino acids and derivatives	67485814784
Pos_17082	Positive	7.50168	279.17	Phenylalanylleucine	[M+H]+	C15H22N2O3	Peptides	1045737472
Pos_14869	Positive	7.04267	263.139	Phe-Pro	[M+H]+	C14H18N2O3	Peptides	426134592
Pos_15151	Positive	7.09833	255.123	Phomalone	[M+H]+	C13H18O5	Ketones	576933440
Pos_29130	Positive	11.1498	297.133	Phomopsolid B	[M+H]+	C15H20O6	Dihydropyranones	376675936
Neg_02637	Negative	0.74775	96.9696	Phosphoric Acid	[M-H]-	H3O4P	Non-metal phosphates	81264912
Neg_15982	Negative	7.35742	165.019	Phthalic Acid	[M-H]-	C8H6O4	Benzoic acids	3060400896
Pos_27653	Positive	10.455	318.3	Phytosphingosine	[M+H]+	C18H39NO3	Alkanolamines	775884992
Neg_32202	Negative	12.2934	885.55	PI(18:0/20:4)	[M-H]-	C47H83O13P	Phosphatidylinositols	62877788
Pos_05431	Positive	1.82397	110.06	Piconol	[M+CH3OH+H]+	C6H7NO	Pyridines and derivatives	1812052224
Pos_26987	Positive	10.1769	331.082	Pilosin	[M+CH3OH+H]+	C17H14O7	Flavonoids	4945917952
Pos_04369	Positive	1.44877	130.086	Pipecolic Acid	[M+H]+	C6H11NO2	Amino acids and derivatives	1783496448
Neg_14617	Negative	6.93908	165.019	Piperonylic Acid	[M-H]-	C8H6O4	Benzodioxoles	1730498816
Pos_05466	Positive	1.82397	241.155	Pirbuterol	[M+H]+	C12H20N2O3	Pyridines and derivatives	795217088
Neg_24750	Negative	9.57875	281.139	Pisumic Acid	[M-H]-	C15H22O5	Prenol lipids	866407552
Pos_17437	Positive	7.57128	178.087	Plantagonine	[M+Na]+	C10H11NO2	Pyridines and derivatives	825826880
Neg_21498	Negative	8.7964	203.128	P-Menthane-1,2,8,9-Tetrol	[M-H]-	C10H20O4	Prenol lipids	333546528
Pos_21981	Positive	8.50485	135.117	P-Menthatriene	[M+H]+	C10H14	Prenol lipids	2059856000
Neg_22210	Negative	8.97788	243.123	Polyethylene, Oxidized	[M-H]-	C12H20O5	Keto acids and derivatives	1234757888
Neg_13434	Negative	6.56295	395.19	Pregnenolone Sulfate	[M-H]-	C21H32O5S	Sulfated steroids	147459616
Pos_04517	Positive	1.5182	116.071	Proline	[M+H]+	C5H9NO2	Amino acids and derivatives	46628663296
Pos_10939	Positive	5.9003	215.139	Prolylvaline	[M+H]+	C10H18N2O3	Peptides	2332741120
Pos_23308	Positive	8.89517	189.16	Propamocarb	[M+H]+	C9H20N2O2	Amino acids and derivatives	457272288
Pos_18825	Positive	7.83578	329.158	Propentofylline	[M+Na]+	C15H22N4O3	Xanthines	253926752
Pos_27292	Positive	10.3159	210.112	Propoxur	[M+H]+	C11H15NO3	Phenol ethers	785055936
Neg_13340	Negative	6.53508	211.061	Propyl Gallate	[M-H]-	C10H12O5	Hydroxybenzoic acid derivatives	1239082880
Pos_06157	Positive	2.12925	97.0284	Protoanemonin	[M+H]+	C5H4O2	Dihydrofurans	3406447616
Neg_13427	Negative	6.56295	315.072	Protocatechuic Acid 4-Glucoside	[M-H]-	C13H16O9	Phenolic glycosides	442118048
Neg_23159	Negative	9.20172	281.046	Pseudobaptigenin	[M-H]-	C16H10O5	Isoflavones	203621152
Neg_08149	Negative	3.03318	323.028	Pseudouridine 5'-Phosphate	[M-H]-	C9H13N2O9P	Organooxygen compounds	228990816
Pos_10215	Positive	5.67793	203.053	Psicose	[M+Na]+	C6H12O6	Monosaccharides	257016928
Pos_23757	Positive	9.02075	263.127	Psilostachyin	[M-H2O+H]+	C15H20O5	Sesquiterpene lactones	339130272
Neg_15691	Negative	7.27362	242.997	P-Sulfoxycinnamic Acid	[M-H]-	C9H8O6S	Cinnamic acids	248862928
Pos_22788	Positive	8.72783	235.133	Pterosin G	[M+H]+	C14H18O3	Indanones	548559872
Pos_01669	Positive	1.02288	89.1073	Putrescine	[M+H]+	C4H12N2	Primary amines	446183104
Pos_28859	Positive	11.0248	211.087	Pyocyanine	[M+H]+	C13H10N2O	Quinoxalines	1799879040
Pos_06885	Positive	2.54565	168.065	Pyridoxal	[M+H]+	C8H9NO3	Pyridoxals and derivatives	1113257856
Pos_07292	Positive	2.8507	170.081	Pyridoxine	[M+H]+	C8H11NO3	Pyridoxines	1720386816
Pos_09201	Positive	4.55612	332.134	Pyridoxine-Alpha-Glucoside	[M+H]+	C14H21NO8	Pyridines and derivatives	1055144832
Neg_06037	Negative	1.60267	188.056	Pyroglutamic Acid	[M+CH3COO]-	C5H7NO3	Amino acids and derivatives	16599528448
Pos_16925	Positive	7.47387	243.134	Pyroglutamylisoleucine	[M+H]+	C11H18N2O4	Peptides	409109248
Neg_16467	Negative	7.51055	241.119	Pyroglutamyl-Isoleucine	[M-H]-	C11H18N2O4	Dipeptides	263499664
Neg_07327	Negative	2.4635	128.035	Pyrroline Hydroxycarboxylate	[M-H]-	C5H7NO3	Carboxylic acids and derivatives	30348892160
Neg_05017	Negative	1.25448	193.071	Quebrachitol	[M-H]-	C7H14O6	Organooxygen compounds	554437056
Pos_17666	Positive	7.61308	303.05	Quercetin	[M+H]+	C15H10O7	Flavonols	396630528
Neg_17770	Negative	7.88723	477.067	Quercetin 3-O-Glucuronide	[M-H]-	C21H18O13	Flavonoid O-glycosides	714296704
Neg_19059	Negative	8.23667	549.089	Quercetin 3-O-Malonylglucoside	[M-H]-	C24H22O15	Flavonoid O-glycosides	130244520
Pos_28258	Positive	10.7469	179.144	Quinceoxepine	[M+CH3OH+H]+	C12H18O	Organooxygen compounds	774416832
Neg_04255	Negative	0.947483	191.056	Quinic Acid	[M-H]-	C7H12O6	Cyclic alcohols and derivatives	36642713600
Neg_12582	Negative	6.25643	167.034	Quinolacetic Acid	[M-H]-	C8H8O4	Organooxygen compounds	1311153408
Neg_21924	Negative	8.90812	144.046	Quinolinol	[M-H]-	C9H7NO	Hydroquinolones	973660096
Pos_33210	Positive	12.8125	419.277	Radiclonic Acid	[M+Na]+	C23H40O5	Acyclic diterpenoids	4427740672
Neg_05129	Negative	1.28243	539.138	Raffinose	[M+Cl]-	C18H32O16	Oligosaccharides	275706080
Pos_21573	Positive	8.3934	639.192	Rhamnazin 3-Rutinoside	[M+Na]+	C29H34O16	Flavonoids	1460451840
Pos_17465	Positive	7.57128	641.171	Rhamnetin 3-Sophoroside	[M+H]+	C28H32O17	Flavonoid O-glycosides	65908136
Neg_33062	Negative	12.7929	283.025	Rhein	[M-H]-	C15H8O6	Anthracenecarboxylic acids	940443904
Neg_27977	Negative	10.5685	299.114	Rhodioloside	[M-H]-	C14H20O7	Glycosyl compounds	1324388096
Pos_23797	Positive	9.03468	442.265	Rhodiooctanoside	[M+NH4]+	C19H36O10	Fatty acyl glycosides	159957424
Neg_18433	Negative	8.0548	577.156	Rhoifolin	[M-H]-	C27H30O14	Flavonoid O-glycosides	76902208
Pos_03967	Positive	1.28165	175.058	Ribitol	[M+Na]+	C5H12O5	Sugar alcohols	153255072
Pos_15065	Positive	7.08445	377.146	Riboflavin	[M+H]+	C17H20N4O6	Flavins	652456576
Pos_05612	Positive	1.86558	259.092	Ribothymidine	[M+H]+	C10H14N2O6	Pyrimidine nucleosides	1101478272
Pos_15845	Positive	7.25123	387.201	Roseoside	[M+H]+	C19H30O8	Fatty acyl glycosides	691256896
Neg_15938	Negative	7.34342	359.077	Rosmarinic Acid	[M-H]-	C18H16O8	Coumaric acids and derivatives	296410176
Neg_24001	Negative	9.38342	637.156	Rugulotrosin A	[M-H]-	C32H30O14	Dibenzopyrans	357783104
Neg_30003	Negative	11.32	247.134	Rupestonic Acid	[M-H]-	C15H20O3	Guaianes	686896256
Pos_17938	Positive	7.66868	611.161	Rutin	[M+H]+	C27H30O16	Flavonoid O-glycosides	279685408
Neg_15207	Negative	7.14803	136.04	Salicylamide	[M-H]-	C7H7NO2	Aralkylamines	660578368
Pos_14816	Positive	7.02877	139.039	Salicylic Acid	[M+H]+	C7H6O3	Hydroxybenzoic acid derivatives	7531565568
Pos_14142	Positive	6.86188	224.092	Salsolinol-1-Carboxylic Acid	[M+H]+	C11H13NO4	Tetrahydroisoquinolines	489635008
Pos_10228	Positive	5.6918	90.055	Sarcosine	[M+H]+	C3H7NO2	Amino acids and derivatives	160199552
Neg_16015	Negative	7.35742	563.141	Schaftoside	[M-H]-	C26H28O14	Flavonoid C-glycosides	111907280
Pos_26459	Positive	9.95425	439.209	Schizandrin A	[M+Na]+	C24H32O6	Hydrolyzable tannins	576666304
Pos_17998	Positive	7.68258	595.166	Scolimoside	[M+H]+	C27H30O15	Flavonoid O-glycosides	721694272
Neg_19889	Negative	8.44707	191.035	Scopoletin	[M-H]-	C10H8O4	7-hydroxycoumarins	3866845184
Neg_23533	Negative	9.27173	201.113	Sebacic Acid	[M-H]-	C10H18O4	Medium-chain fatty acids	989205376
Pos_17351	Positive	7.55733	327.159	Secoisolariciresinol	[M-2H2O+H]+	C20H26O6	Dibenzylbutanediol lignans	170751264
Neg_04589	Negative	1.05913	209.066	Sedoheptulose	[M-H]-	C7H14O7	Organooxygen compounds	2660409600
Neg_03986	Negative	0.8223	104.035	Serine	[M-H]-	C3H7NO3	Amino acids and derivatives	90611848
Pos_11357	Positive	5.98382	219.134	Serylleucine	[M+H]+	C9H18N2O4	Peptides	627388736
Pos_30349	Positive	11.707	337.107	Sesamin	[M+H-H2O]+	C20H18O6	Furanoid lignans	433838752
Neg_34797	Negative	13.681	137.024	Sesamol	[M-H]-	C7H6O3	Benzodioxoles	985582208
Neg_05014	Negative	1.25448	173.046	Shikimic Acid	[M-H]-	C7H10O5	Cyclic alcohols and derivatives	182965472
Pos_11659	Positive	6.05383	202.085	Simazine	[M+H]+	C7H12ClN5	Halo-S-triazines	393631072
Neg_21979	Negative	8.92207	207.066	Sinapaldehyde	[M-H]-	C11H12O4	Methoxyphenols	1130942592
Pos_25081	Positive	9.46675	211.096	Sinapic Alcohol	[M+H]+	C11H14O4	Methoxyphenols	411456832
Pos_20936	Positive	8.22605	330.17	Sinomenine	[M+H]+	C19H23NO4	Morphinans	507129024
Neg_23031	Negative	9.1739	491.12	Sissotrine	[M+FA-H]-	C22H22O10	Isoflavonoid O-glycosides	1763351808
Pos_13456	Positive	6.63917	325.092	Skimmin	[M+H]+	C15H16O8	Coumarin glycosides	609604928
Pos_05041	Positive	1.71288	247.18	Sophocarpine	[M+H]+	C15H22N2O	Matrine alkaloids	9780871168
Pos_05887	Positive	1.99047	263.053	Sorbitol 6-Phosphate	[M+H]+	C6H15O9P	Monosaccharides	1576600064
Neg_05956	Negative	1.5608	161.045	Sorbose	[M-H2O-H]-	C6H12O6	Monosaccharides	10865142784
Pos_01986	Positive	1.09223	146.165	Spermidine	[M+H]+	C7H19N3	Secondary amines	532185152
Neg_17549	Negative	7.84503	463.088	Spiraeoside	[M-H]-	C21H20O12	Flavonoid O-glycosides	193381376
Pos_11967	Positive	6.15145	105.07	Styrene	[M+H]+	C8H8	Styrenes	5687580672
Neg_20687	Negative	8.61467	173.082	Suberic Acid	[M-H]-	C8H14O4	Medium-chain fatty acids	1217048064
Pos_13910	Positive	6.79223	232.118	Suberylglycine	[M+H]+	C10H17NO5	Amino acids and derivatives	562968064
Neg_06668	Negative	2.01933	117.019	Succinic Acid	[M-H]-	C4H6O4	Dicarboxylic acids and derivatives	34762641408
Neg_35024	Negative	13.8334	99.0082	Succinic Anhydride	[M-H]-	C4H4O3	Carboxylic acids and derivatives	215061296
Pos_05288	Positive	1.78233	262.129	Succinylcarnitine	[M+H]+	C11H19NO6	Fatty Acyls	3352974592
Neg_04519	Negative	1.03135	341.109	Sucrose	[M-H]-	C12H22O11	Glycosyl compounds	612511488
Neg_16422	Negative	7.49663	305.069	Sulfooxyjasmonate	[M-H]-	C12H18O7S	Sulfate containing metabolites	6960568832
Pos_21431	Positive	8.36558	183.065	Syringaldehyde	[M+H]+	C9H10O4	Methoxyphenols	1911793536
Pos_22693	Positive	8.69997	395.11	Tangeretin	[M+Na]+	C20H20O7	8-O-methylated flavonoids	289926432
Pos_04292	Positive	1.42085	198.112	Tenuazonic Acid	[M+H]+	C10H15NO3	Pyrrolines	499319776
Pos_23024	Positive	8.79767	463.123	Termopsoside	[M+H]+	C22H22O11	Flavonoid O-glycosides	735490432
Pos_27253	Positive	10.302	249.148	Terrecyclic Acid	[M+H]+	C15H20O3	Diterpenoids	2593963264
Pos_27617	Positive	10.4411	302.305	Tetradecyldiethanolamine	[M+H]+	C18H39NO2	Alkanolamines	819267584
Neg_13297	Negative	6.52117	187.061	Tetrahydro-2,5-Furan-Diacetic Acid	[M-H]-	C8H12O5	Carboxylic acids and derivatives	461406304
Pos_15268	Positive	7.12613	231.113	Tetrahydroharman-3-Carboxylic Acid	[M+H]+	C13H14N2O2	Harmala alkaloids	2691185664
Pos_04367	Positive	1.44877	84.0808	Tetrahydropyridine	[M+NH4]+	C5H9N	Pyridines and derivatives	445456160
Pos_29165	Positive	11.1637	343.118	Tetramethoxyluteolin	[M+NH4]+	C19H18O6	Flavonoids	1993884672
Pos_15004	Positive	7.07055	320.109	Tetrodotoxin	[M+H]+	C11H17N3O8	Quinazolines	1048565632
Pos_03945	Positive	1.2678	203.054	Theophylline	[M+Na]+	C7H8N4O2	Xanthines	5021308928
Pos_04144	Positive	1.36532	265.112	Thiamine	[M]+	C12H17N4OS	Thiamines	219835776
Neg_04114	Negative	0.877883	135.03	Threonic Acid	[M-H]-	C4H8O5	Sugar acids and derivatives	2885103616
Pos_11701	Positive	6.06777	233.15	Threonylleucine	[M+H]+	C10H20N2O4	Peptides	845438528
Pos_12393	Positive	6.30477	267.134	Threonylphenylalanine	[M+H]+	C13H18N2O4	Peptides	296436512
Pos_21087	Positive	8.26802	271.06	Thunberginol A	[M+H]+	C15H10O5	Isocoumarins and derivatives	1689300224
Pos_12945	Positive	6.48597	151.112	Thymol	[M+H]+	C10H14O	Aromatic monoterpenoids	655622528
Pos_21358	Positive	8.33763	494.33	Tiamulin	[M+H]+	C28H47NO4S	Mutilane diterpenoids	187213344
Pos_18509	Positive	7.78005	329.153	Tiapride	[M+H]+	C15H24N2O4S	Benzenesulfonyl compounds	276874272
Pos_14765	Positive	7.01487	244.155	Tiglylcarnitine	[M+H]+	C12H21NO4	Fatty Acyls	628492224
Pos_17986	Positive	7.68258	324.178	Trachelanthine	[M+Na]+	C15H27NO5	Pyrrolizidines	377010976
Neg_20619	Negative	8.60067	171.066	Trans-3-Octenedioic Acid	[M-H]-	C8H12O4	Fatty Acyls	356874144
Neg_27984	Negative	10.5685	393.193	Trans-4-[4-(4-Amino-7,7-Dimethyl-7H-Pyrimido[4,5-B][1,4]Oxazin-6-Yl)Phenyl]Cyclohexaneacetic Acid	[M-H]-	C22H26N4O3	Diazines	301891424
Neg_05252	Negative	1.31042	173.009	Trans-Aconitic Acid	[M-H]-	C6H6O6	Tricarboxylic acids and derivatives	1754753024
Neg_26329	Negative	10.0113	227.129	Traumatic Acid	[M-H]-	C12H20O4	Medium-chain fatty acids	1238112512
Pos_32252	Positive	12.4892	399.251	Tri(Butoxyethyl)Phosphate	[M+H]+	C18H39O7P	Alkyl phosphates	155902112
Neg_22131	Negative	8.95007	677.151	Tricaffeoyl Quinic Acid	[M-H]-	C34H30O15	Cyclic alcohols and derivatives	147501984
Neg_07062	Negative	2.2832	175.025	Tricarballylic Acid	[M-H]-	C6H8O6	Tricarboxylic acids and derivatives	1364927488
Pos_26138	Positive	9.84277	331.081	Tricin	[M+H]+	C17H14O7	3'-O-methylated flavonoids	3107023872
Neg_15945	Negative	7.34342	491.12	Tricin 5-Glucoside	[M-H]-	C23H24O12	Flavonoid O-glycosides	129125920
Pos_24290	Positive	9.2161	584.275	Tricoumaroyl Spermidine	[M+H]+	C34H37N3O6	Coumaric acids and derivatives	175548896
Pos_16311	Positive	7.34867	227.164	Tridecanedioic Acid	[M+H-H2O]+	C13H24O4	Long-chain fatty acids	677621184
Neg_05321	Negative	1.32427	112.986	Trifluoroacetic Acid	[M-H]-	C2HF3O2	Alpha-halocarboxylic acids	316201248
Pos_04252	Positive	1.40697	138.055	Trigonelline	[M+H]+	C7H7NO2	Alkaloids and derivatives	11766749184
Neg_10429	Negative	4.9227	142.05	Trimethadione	[M-H2O-H]-	C6H9NO3	Azolidines	2133827584
Pos_04032	Positive	1.32348	76.0757	Trimethyloxamine	[M+H]+	C3H9NO	Trialkyl amine oxides	301637344
Pos_30100	Positive	11.6094	335.162	Triptophenolide	[M+Na]+	C20H24O3	Oxosteroids	453619872
Neg_30927	Negative	11.6957	638.331	Tris(Chloroethyl) Phosphate	[M-H]-	C29H54NO12P	Lipids	177408800
Pos_11435	Positive	5.99795	149.06	Tropic Acid	[M+H-H2O]+	C9H10O3	Beta hydroxy acids and derivatives	378689248
Pos_12550	Positive	6.36057	205.097	Tryptophan	[M+H]+	C11H12N2O2	Amino acids and derivatives	29610467328
Pos_08096	Positive	3.60007	182.081	Tyrosine	[M+H]+	C9H11NO3	Amino acids and derivatives	21560412160
Pos_13555	Positive	6.6671	295.165	Tyrosylleucine	[M+H]+	C15H22N2O4	Peptides	337828192
Neg_25439	Negative	9.77395	215.129	Undecanedioic Acid	[M-H]-	C11H20O4	Medium-chain fatty acids	1240008960
Pos_06263	Positive	2.18478	113.035	Uracil	[M+H]+	C4H4N2O2	Pyrimidones	4768001536
Neg_24089	Negative	9.41133	461.203	Urceolide	[M-H]-	C21H34O11	Disaccharides	127627312
Neg_07135	Negative	2.32477	167.021	Uric Acid	[M-H]-	C5H4N4O3	Xanthines	1070291840
Neg_09101	Negative	3.76917	243.062	Uridine	[M-H]-	C9H12N2O6	Pyrimidine nucleosides	2720886272
Pos_12640	Positive	6.38843	231.17	Valylisoleucine	[M+H]+	C11H22N2O3	Peptides	2870434560
Pos_13955	Positive	6.80623	265.155	Valylphenylalanine	[M+H]+	C14H20N2O3	Peptides	993455040
Pos_11508	Positive	6.01188	281.15	Valyltyrosine	[M+H]+	C14H20N2O4	Carboxylic acids and derivatives	1102464128
Neg_16384	Negative	7.48273	167.035	Vanillic Acid	[M-H]-	C8H8O4	Methoxybenzoic acids and derivatives	1323160448
Neg_12304	Negative	6.159	329.088	Vanilloyl Glucose	[M-H]-	C14H18O9	Tannins	518055424
Neg_16823	Negative	7.622	461.166	Verbasoside	[M-H]-	C20H30O12	Glycosyl compounds	332533568
Pos_23448	Positive	8.93708	267.159	Verrucarol	[M+H]+	C15H22O4	Trichothecenes	662005760
Pos_26487	Positive	9.96817	260.201	Vesamicol	[M+H]+	C17H25NO	Phenylpiperidines	1177622784
Pos_30819	Positive	11.9437	273.112	Vestitol	[M+H]+	C16H16O4	4'-O-methylated isoflavonoids	1845542784
Pos_14321	Positive	6.90365	595.166	Vicenin 2	[M+H]+	C27H30O15	Flavonoid C-glycosides	1077748864
Pos_26976	Positive	10.1769	226.182	Vitamin K1	[M+2H]+	C31H46O2	Vitamin K compounds	648766464
Pos_16168	Positive	7.3209	235.169	Walleminone	[M-H2O+H]+	C15H24O3	Sesquiterpenoids	545536064
Neg_23391	Negative	9.24375	459.093	Wogonoside	[M-H]-	C22H20O11	Flavonoid O-glycosides	227836592
Pos_06188	Positive	2.1431	153.041	Xanthine	[M+H]+	C5H4N4O2	Xanthines	548102400
Pos_20317	Positive	8.1006	197.081	Xanthoxyline	[M+H]+	C10H12O4	Ketones	631523904
Neg_29323	Negative	11.0418	187.133	Xi-5-Hydroxydecanoic Acid	[M-H]-	C10H20O3	Fatty Acyls	244827040
Neg_26232	Negative	9.98342	301.202	Xi-7-Hydroxyhexadecanedioic Acid	[M-H]-	C16H30O5	Fatty Acyls	430844864
Pos_15898	Positive	7.2652	153.128	Xi-P-Mentha-3,8-Dien-1-Ol	[M+H-H2O]+	C10H16O	Prenol lipids	4228656640
Pos_08217	Positive	3.69703	175.058	Xylitol	[M+Na]+	C5H12O5	Sugar alcohols	1006947136
Pos_10723	Positive	5.85835	212.103	Zalcitabine	[M+H]+	C9H13N3O3	Pyrimidine 2',3'-dideoxyribonucleosides	1455880832
Pos_11449	Positive	5.99795	306.135	Zaleplon	[M+H]+	C17H15N5O	Phenylpyrimidines	295429280
Pos_29533	Positive	11.3305	201.164	Zerumbone	[M+H-H2O]+	C15H22O	Sesquiterpenoids	3942256640
Neg_02341	Negative	0.7338	112.986					500420960
Neg_04156	Negative	0.891833	250.093					648458496
Neg_04297	Negative	0.96145	209.066					2086336256
Neg_04329	Negative	0.975383	177.04					1244279296
Neg_04365	Negative	0.989367	213.017					1003142144
Neg_04473	Negative	1.01735	377.086					8523271168
Neg_04591	Negative	1.05913	215.035					19733981184
Neg_04628	Negative	1.07307	175.025					295144512
Neg_04657	Negative	1.08703	119.034					854768768
Neg_04701	Negative	1.11502	115.002					3179170048
Neg_04716	Negative	1.11502	377.086					7630235136
Neg_04785	Negative	1.15687	89.0239					1635877888
Neg_04888	Negative	1.19865	283.061					1961962496
Neg_04947	Negative	1.24053	114.056					757412800
Neg_04957	Negative	1.24053	195.051					887738944
Neg_05258	Negative	1.31042	188.056					1052645120
Neg_05318	Negative	1.32427	89.0239					8180186624
Neg_05541	Negative	1.38	111.008					2283046912
Neg_05547	Negative	1.38	138.019					688259328
Neg_05615	Negative	1.40793	128.035					26796802048
Neg_05735	Negative	1.44953	133.014					11042999296
Neg_05844	Negative	1.50528	75.0082					1571315200
Neg_05846	Negative	1.50528	101.024					3416484864
Neg_05848	Negative	1.50528	165.04					801245184
Neg_05878	Negative	1.51915	177.04					2382648832
Neg_05908	Negative	1.53305	195.051					1314559232
Neg_05953	Negative	1.5608	122.024					346474336
Neg_06035	Negative	1.60267	144.067					428047232
Neg_06142	Negative	1.67202	185.045					709732672
Neg_06193	Negative	1.71377	125.024					1096990720
Neg_06201	Negative	1.71377	187.024					4071700480
Neg_06203	Negative	1.71377	202.072					1061731200
Neg_06253	Negative	1.75542	85.0295					1670583552
Neg_06254	Negative	1.75542	111.008					896150848
Neg_06255	Negative	1.75542	111.008					896150848
Neg_06281	Negative	1.76933	243.062					2002327552
Neg_06283	Negative	1.76933	279.039					6087731200
Neg_06403	Negative	1.85268	205.035					604910016
Neg_06623	Negative	1.97762	173.046					675048256
Neg_06665	Negative	2.01933	99.0082					1113799168
Neg_06790	Negative	2.10255	205.035					842369472
Neg_07019	Negative	2.25537	191.02					27651325952
Neg_07030	Negative	2.26927	111.008					1739288192
Neg_07058	Negative	2.2832	94.0293					411788480
Neg_07350	Negative	2.4775	115.004					7892006400
Neg_07358	Negative	2.4775	177.04					4153870080
Neg_07386	Negative	2.49137	159.029					465404992
Neg_07439	Negative	2.51913	188.056					2973042944
Neg_07720	Negative	2.72763	130.087					254064784
Neg_07747	Negative	2.74148	290.088					31959730176
Neg_07867	Negative	2.82487	129.019					2579191296
Neg_07870	Negative	2.82487	173.009					3226670080
Neg_07926	Negative	2.8527	99.0082					840991168
Neg_07927	Negative	2.8527	117.019					54581841920
Neg_08003	Negative	2.90828	141.019					473149504
Neg_08050	Negative	2.94988	188.056					8936655872
Neg_08075	Negative	2.97772	75.0082					593422784
Neg_08080	Negative	2.97772	188.092					495581600
Neg_08126	Negative	3.01933	147.03					8035806720
Neg_08140	Negative	3.03318	85.0295					949317888
Neg_08142	Negative	3.03318	111.008					619254720
Neg_08145	Negative	3.03318	173.009					6398729728
Neg_08239	Negative	3.11648	151.026					1281009408
Neg_08241	Negative	3.11648	265.093					598873664
Neg_08362	Negative	3.22753	75.0082					706113408
Neg_08392	Negative	3.24142	292.139					1464652544
Neg_08468	Negative	3.31083	205.035					422525568
Neg_08722	Negative	3.50522	243.062					2075117696
Neg_08831	Negative	3.6024	173.046					3058313984
Neg_08856	Negative	3.61628	173.009					2542072064
Neg_08892	Negative	3.64413	125.022					6671804928
Neg_08966	Negative	3.68583	344.04					2397267712
Neg_08995	Negative	3.69968	290.088					844889280
Neg_09069	Negative	3.7414	133.05					4747094016
Neg_09105	Negative	3.76917	279.039					2271592448
Neg_09252	Negative	3.8664	130.087					429528288
Neg_09284	Negative	3.88035	292.14					3125742080
Neg_09450	Negative	4.00533	191.056					8458537984
Neg_09552	Negative	4.08863	129.019					3607487488
Neg_09565	Negative	4.10253	85.0295					677913664
Neg_09609	Negative	4.14415	144.067					1510463616
Neg_09676	Negative	4.24135	154.015					1008115648
Neg_09697	Negative	4.26918	187.024					1465478912
Neg_10103	Negative	4.6587	173.046					631732608
Neg_10181	Negative	4.72812	130.087					1367692672
Neg_10182	Negative	4.72812	147.066					2679073024
Neg_10270	Negative	4.81145	173.046					906934528
Neg_10353	Negative	4.86705	328.045					6517942784
Neg_10408	Negative	4.90878	130.087					974502848
Neg_10727	Negative	5.20038	184.062					640383424
Neg_10894	Negative	5.36712	191.056					5711911936
Neg_11146	Negative	5.58923	110.025					402692000
Neg_11181	Negative	5.63088	154.015					381780832
Neg_11409	Negative	5.82517	145.05					4992762368
Neg_11584	Negative	5.95018	290.088					329860928
Neg_11589	Negative	5.95018	344.04					635651264
Neg_11648	Negative	5.978	265.093					486082496
Neg_11698	Negative	5.99192	142.05					881776448
Neg_11924	Negative	6.03372	147.066					1581264256
Neg_11927	Negative	6.03372	188.092					438144352
Neg_11928	Negative	6.03372	191.056					2919247872
Neg_11981	Negative	6.04763	173.046					1241630080
Neg_11988	Negative	6.04763	205.035					630184960
Neg_12026	Negative	6.04763	285.06					486459392
Neg_12071	Negative	6.06158	164.072					1448725376
Neg_12076	Negative	6.06158	185.045					463338400
Neg_12176	Negative	6.11727	341.109					1096221824
Neg_12274	Negative	6.159	89.0239					4738702336
Neg_12282	Negative	6.159	173.046					943893824
Neg_12383	Negative	6.18687	158.082					344945696
Neg_12459	Negative	6.21468	131.035					3207398656
Neg_12555	Negative	6.2425	147.066					1266228480
Neg_12557	Negative	6.2425	187.024					357775104
Neg_12637	Negative	6.28427	156.067					927743872
Neg_12655	Negative	6.28427	339.072					152815584
Neg_12704	Negative	6.3121	122.024					2401132032
Neg_12917	Negative	6.38178	135.045					266150032
Neg_12979	Negative	6.39567	169.014					436271936
Neg_12986	Negative	6.39567	353.087					23953995776
Neg_13157	Negative	6.46557	189.077					474995296
Neg_13161	Negative	6.46557	299.077					381793536
Neg_13193	Negative	6.47945	175.061					7141172224
Neg_13310	Negative	6.52117	343.103					301585312
Neg_13597	Negative	6.61845	111.008					727038208
Neg_13628	Negative	6.63233	158.082					669755072
Neg_13665	Negative	6.64622	175.061					2567985152
Neg_13841	Negative	6.70193	189.077					1291825152
Neg_13877	Negative	6.70193	487.146					156625472
Neg_14148	Negative	6.79945	191.056					3287403776
Neg_14210	Negative	6.8134	431.119					180204176
Neg_14627	Negative	6.93908	293.124					824202752
Neg_14641	Negative	6.93908	593.151					502698976
Neg_14801	Negative	7.00875	109.03					363202848
Neg_14880	Negative	7.03653	395.192					373924224
Neg_14903	Negative	7.05045	137.024					32313505792
Neg_15021	Negative	7.09222	447.151					350005664
Neg_15163	Negative	7.1341	161.045					3053164032
Neg_15212	Negative	7.14803	189.077					5504545280
Neg_15342	Negative	7.17592	623.162					44632776
Neg_15412	Negative	7.18993	367.103					626516416
Neg_15494	Negative	7.21767	215.002					501483008
Neg_15634	Negative	7.25955	189.077					7738394624
Neg_15701	Negative	7.27362	515.12					10663062528
Neg_15917	Negative	7.34342	121.029					798547712
Neg_15927	Negative	7.34342	195.066					776778944
Neg_15994	Negative	7.35742	337.092					1285679488
Neg_16042	Negative	7.37137	129.056					3191934464
Neg_16046	Negative	7.37137	159.066					1063816704
Neg_16118	Negative	7.38533	135.045					5431180288
Neg_16129	Negative	7.38533	387.166					237975504
Neg_16580	Negative	7.55235	172.097					657213760
Neg_16628	Negative	7.56622	367.103					1972673024
Neg_17034	Negative	7.67783	609.146					344683584
Neg_17105	Negative	7.69175	593.151					360621152
Neg_17219	Negative	7.73347	158.082					587296128
Neg_17249	Negative	7.74737	377.182					1012755072
Neg_17251	Negative	7.74737	387.166					180514320
Neg_17903	Negative	7.9152	172.097					800916736
Neg_18043	Negative	7.94328	485.086					197577056
Neg_18197	Negative	7.98502	225.113					571388480
Neg_18227	Negative	7.9989	107.05					589781952
Neg_18332	Negative	8.02688	250.071					180603568
Neg_18338	Negative	8.02688	367.103					186507904
Neg_18452	Negative	8.06887	109.03					400877824
Neg_18631	Negative	8.11097	515.12					16043496448
Neg_18842	Negative	8.16688	463.088					350603872
Neg_18867	Negative	8.18083	121.029					493239904
Neg_18871	Negative	8.18083	166.051					396422048
Neg_18916	Negative	8.19472	463.125					552677376
Neg_18953	Negative	8.20882	188.035					243664896
Neg_19146	Negative	8.26487	289.081					493356896
Neg_19324	Negative	8.30682	203.128					445081984
Neg_19549	Negative	8.36322	353.088					1300223872
Neg_19638	Negative	8.37713	515.12					20839315456
Neg_19780	Negative	8.4189	415.197					1439035520
Neg_20058	Negative	8.48892	237.113					246976560
Neg_20134	Negative	8.50292	475.088					317010400
Neg_20287	Negative	8.54485	269.175					193938448
Neg_20479	Negative	8.5728	515.174					181525120
Neg_20532	Negative	8.58677	121.029					1564988800
Neg_20696	Negative	8.61467	243.123					681293440
Neg_21207	Negative	8.7265	463.125					169111456
Neg_21267	Negative	8.7406	243.123					3702697984
Neg_21287	Negative	8.7406	567.135					199483376
Neg_21324	Negative	8.75463	173.081					566512896
Neg_21731	Negative	8.85233	637.177					93062688
Neg_21758	Negative	8.86635	165.056					499589248
Neg_21770	Negative	8.86635	287.056					343365824
Neg_21828	Negative	8.88025	595.146					105539176
Neg_22105	Negative	8.95007	299.056					471499808
Neg_22206	Negative	8.97788	177.056					815446848
Neg_22550	Negative	9.04797	885.485					53446580
Neg_22581	Negative	9.06197	199.097					1477660288
Neg_22595	Negative	9.06197	469.229					330206752
Neg_22905	Negative	9.14578	135.045					4926226432
Neg_23022	Negative	9.1739	469.229					176982672
Neg_23026	Negative	9.1739	481.091					365082816
Neg_23211	Negative	9.2158	395.209					1055737600
Neg_23295	Negative	9.22978	435.093					166066384
Neg_23537	Negative	9.27173	285.04					6930800640
Neg_23794	Negative	9.3275	263.129					496457696
Neg_23897	Negative	9.35548	267.16					359228672
Neg_24085	Negative	9.41133	393.193					122803552
Neg_24147	Negative	9.42532	283.061					3140932608
Neg_24436	Negative	9.49507	395.209					655997696
Neg_24508	Negative	9.50908	393.193					264325584
Neg_24546	Negative	9.52307	267.16					581422848
Neg_24591	Negative	9.537	179.071					436570464
Neg_24688	Negative	9.56485	213.113					385999552
Neg_24997	Negative	9.6485	225.113					1130379136
Neg_25014	Negative	9.6485	515.12					462881216
Neg_25066	Negative	9.6624	301.072					281293472
Neg_25313	Negative	9.73215	213.113					392769088
Neg_25500	Negative	9.78785	194.082					361604640
Neg_25503	Negative	9.78785	269.046					3784846336
Neg_25507	Negative	9.78785	325.202					878817408
Neg_25788	Negative	9.87158	329.067					501132000
Neg_25887	Negative	9.89957	159.102					514702720
Neg_25968	Negative	9.91358	201.113					788880128
Neg_26179	Negative	9.96945	253.145					369960640
Neg_26281	Negative	9.99733	301.202					107555576
Neg_26285	Negative	9.99733	329.067					476181056
Neg_26414	Negative	10.0393	283.061					1974844672
Neg_26719	Negative	10.1368	325.202					1706516224
Neg_26835	Negative	10.1786	267.16					982908160
Neg_26927	Negative	10.2066	283.061					2579463424
Neg_27091	Negative	10.2483	307.191					490756544
Neg_27118	Negative	10.2622	253.145					438398944
Neg_27239	Negative	10.3041	173.118					970796480
Neg_27254	Negative	10.3041	347.186					404124992
Neg_27435	Negative	10.3736	309.207					1582919296
Neg_27615	Negative	10.4432	215.129					937928064
Neg_27619	Negative	10.4432	327.218					11671654400
Neg_27732	Negative	10.485	307.191					588093056
Neg_27761	Negative	10.4989	325.202					1486179200
Neg_27763	Negative	10.4989	329.233					3933012992
Neg_27795	Negative	10.5128	213.113					3782221824
Neg_28008	Negative	10.5824	215.129					1662755456
Neg_28039	Negative	10.5963	173.118					542001792
Neg_28126	Negative	10.6242	307.191					1921390080
Neg_28313	Negative	10.6799	329.233					3257587456
Neg_28854	Negative	10.8887	251.165					485427040
Neg_28906	Negative	10.9027	307.191					1274222336
Neg_29024	Negative	10.9304	309.207					1897239552
Neg_29119	Negative	10.9583	267.16					943116736
Neg_29264	Negative	11.014	373.092					1323697280
Neg_29285	Negative	11.0279	251.165					569997952
Neg_29599	Negative	11.1391	309.207					2568410624
Neg_29628	Negative	11.153	265.144					778916928
Neg_29633	Negative	11.153	327.218					2872452096
Neg_29725	Negative	11.1948	299.056					1139879808
Neg_30149	Negative	11.3757	562.315					139612912
Neg_30394	Negative	11.4731	474.261					696559360
Neg_30469	Negative	11.5011	562.315					905595904
Neg_30760	Negative	11.6262	311.222					3668901632
Neg_30884	Negative	11.6819	307.191					670838912
Neg_30911	Negative	11.6957	373.166					1145582848
Neg_31191	Negative	11.8347	476.278					148525712
Neg_31269	Negative	11.8765	133.014					584816320
Neg_31280	Negative	11.8765	290.087					317864736
Neg_31290	Negative	11.8765	564.33					217051584
Neg_31387	Negative	11.9182	373.166					295248992
Neg_31891	Negative	12.1545	295.227					518835008
Neg_31971	Negative	12.1962	188.056					123954496
Neg_32177	Negative	12.2934	452.278					354946688
Neg_32834	Negative	12.6404	283.025					553057280
Neg_32859	Negative	12.6542	295.227					375763136
Neg_33098	Negative	12.8068	329.233					344194688
Neg_33124	Negative	12.8207	295.227					255491984
Neg_33721	Negative	13.1535	379.213					1494155648
Neg_34297	Negative	13.4172	885.55					230225968
Neg_34396	Negative	13.459	290.087					212822608
Neg_34700	Negative	13.6255	125.024					358551360
Neg_34726	Negative	13.6394	177.04					4212859392
Neg_34931	Negative	13.778	112.986					313700640
Neg_34990	Negative	13.8195	75.0082					491346752
Neg_34996	Negative	13.8195	119.034					547559680
Neg_35000	Negative	13.8195	135.045					832584960
Neg_35001	Negative	13.8195	141.019					287072448
Neg_35026	Negative	13.8334	101.024					3224858624
Neg_35028	Negative	13.8334	121.029					451904768
Neg_35029	Negative	13.8334	125.022					446806624
Neg_35033	Negative	13.8334	137.024					757279424
Neg_35038	Negative	13.8334	159.029					306318048
Neg_35040	Negative	13.8334	177.04					1319904256
Pos_01518	Positive	0.9814	146.165					720103808
Pos_01713	Positive	1.03673	79.0212					594345152
Pos_03909	Positive	1.25388	262.071					106898344
Pos_03983	Positive	1.29558	104.108					73015853056
Pos_04005	Positive	1.30953	140.068					5377999360
Pos_04044	Positive	1.32348	257.151					2690607104
Pos_04150	Positive	1.36532	320.079					384982944
Pos_04164	Positive	1.37915	146.118					545903808
Pos_04247	Positive	1.40697	116.071					39022358528
Pos_04284	Positive	1.42085	126.092					1237688320
Pos_04286	Positive	1.42085	128.071					937011520
Pos_04289	Positive	1.42085	158.082					1354927488
Pos_04294	Positive	1.42085	216.124					3347227904
Pos_04516	Positive	1.5182	104.108					17705576448
Pos_04520	Positive	1.5182	126.092					1540658048
Pos_04580	Positive	1.53213	252.108					603020096
Pos_04595	Positive	1.53213	363.069					189426288
Pos_04617	Positive	1.54608	172.097					575449024
Pos_04728	Positive	1.60165	180.087					2429122048
Pos_04750	Positive	1.61552	97.0284					1197423232
Pos_04751	Positive	1.61552	104.108					22177128448
Pos_04760	Positive	1.61552	175.119					2237901312
Pos_04820	Positive	1.64328	172.097					883051648
Pos_04851	Positive	1.6572	168.066					369401056
Pos_05047	Positive	1.71288	363.069					644528128
Pos_05165	Positive	1.75458	84.0808					850416384
Pos_05176	Positive	1.75458	152.057					1006451520
Pos_05275	Positive	1.78233	102.055					595637312
Pos_05386	Positive	1.8101	229.155					2766408192
Pos_05399	Positive	1.8101	303.157					1235822464
Pos_05434	Positive	1.82397	123.055					2247021056
Pos_05437	Positive	1.82397	144.102					2883392512
Pos_05448	Positive	1.82397	174.112					912993088
Pos_05451	Positive	1.82397	182.081					2691514368
Pos_05454	Positive	1.82397	186.112					695676416
Pos_05456	Positive	1.82397	188.092					768072704
Pos_05505	Positive	1.83785	140.034					1346147840
Pos_05523	Positive	1.83785	274.092					4306071552
Pos_05592	Positive	1.86558	130.05					8121252864
Pos_05625	Positive	1.86558	332.134					783721856
Pos_05643	Positive	1.8795	146.082					1111929856
Pos_05709	Positive	1.90732	198.112					1003522176
Pos_05711	Positive	1.90732	203.054					6406840320
Pos_05716	Positive	1.90732	247.18					1605629952
Pos_05814	Positive	1.96272	123.055					2796012544
Pos_05850	Positive	1.9766	99.0446					2639482368
Pos_05855	Positive	1.9766	126.092					757513216
Pos_05868	Positive	1.9766	330.06					6600999936
Pos_05991	Positive	2.046	87.044					1483287936
Pos_06003	Positive	2.046	212.053					966907584
Pos_06038	Positive	2.05985	133.05					5280484352
Pos_06113	Positive	2.10155	304.144					1415660800
Pos_06142	Positive	2.11542	325.113					589483776
Pos_06301	Positive	2.19867	245.077					1633461120
Pos_06467	Positive	2.29572	174.124					1144766976
Pos_06526	Positive	2.33728	262.129					989888320
Pos_06576	Positive	2.37887	188.128					578325248
Pos_06596	Positive	2.39275	344.134					2893331200
Pos_06617	Positive	2.40663	136.076					3578148352
Pos_06625	Positive	2.40663	182.081					23865214976
Pos_06820	Positive	2.50397	132.102					62308290560
Pos_06825	Positive	2.50397	229.155					5644316160
Pos_06984	Positive	2.62877	303.157					605456448
Pos_07092	Positive	2.71193	176.092					1787043968
Pos_07227	Positive	2.79518	182.081					6641470976
Pos_07231	Positive	2.79518	299.162					586869632
Pos_07241	Positive	2.80902	188.128					1940644224
Pos_07262	Positive	2.8229	261.144					505045952
Pos_07289	Positive	2.8507	132.102					48755232768
Pos_07332	Positive	2.89235	158.094					5617323520
Pos_07477	Positive	3.0035	188.092					795954880
Pos_07523	Positive	3.04513	274.091					13753192448
Pos_07527	Positive	3.04513	330.06					3016371968
Pos_07641	Positive	3.15625	86.0964					33829167104
Pos_07796	Positive	3.29508	172.119					1178738688
Pos_07864	Positive	3.36443	132.102					118349864960
Pos_07945	Positive	3.43373	185.09					862488896
Pos_07958	Positive	3.44762	113.024					649052160
Pos_07990	Positive	3.48922	276.145					2651626752
Pos_08009	Positive	3.50307	294.156					14090557440
Pos_08069	Positive	3.58622	85.0289					3489244160
Pos_08072	Positive	3.58622	123.055					602371968
Pos_08191	Positive	3.68322	90.055					317386208
Pos_08192	Positive	3.68322	112.039					749766784
Pos_08272	Positive	3.7386	247.06					2167497216
Pos_08346	Positive	3.80792	113.035					1994978176
Pos_08394	Positive	3.8356	245.077					761191872
Pos_08492	Positive	3.91875	159.028					672601664
Pos_08626	Positive	4.00183	113.06					620457344
Pos_08629	Positive	4.00183	186.076					2156973568
Pos_08689	Positive	4.05727	276.145					2752951552
Pos_08690	Positive	4.05727	294.156					12723556352
Pos_08703	Positive	4.0711	203.139					544228096
Pos_08745	Positive	4.11265	113.035					3729969152
Pos_08751	Positive	4.11265	245.077					1229017728
Pos_08779	Positive	4.14035	294.156					12842523648
Pos_08816	Positive	4.16807	344.134					1986277504
Pos_08822	Positive	4.1819	112.039					2203367936
Pos_09042	Positive	4.37597	145.05					41309302784
Pos_09046	Positive	4.37597	175.06					1033474816
Pos_09094	Positive	4.4175	330.06					473790464
Pos_09100	Positive	4.43138	146.082					4127800832
Pos_09103	Positive	4.43138	212.103					941776768
Pos_09360	Positive	4.73623	212.103					1676512512
Pos_09600	Positive	5.02703	221.092					354168192
Pos_09603	Positive	5.02703	276.145					9741372416
Pos_09604	Positive	5.02703	294.156					23684888576
Pos_09616	Positive	5.0409	190.107					518919264
Pos_09731	Positive	5.17935	294.156					42243325952
Pos_09753	Positive	5.19323	276.145					8089169408
Pos_09799	Positive	5.23482	330.06					7382900224
Pos_09990	Positive	5.45638	104.108					1493004544
Pos_10188	Positive	5.65025	203.139					804021760
Pos_10209	Positive	5.67793	104.108					1477678976
Pos_10264	Positive	5.7057	198.097					332459872
Pos_10344	Positive	5.76105	84.0808					234589136
Pos_10350	Positive	5.76105	145.05					74377273344
Pos_10352	Positive	5.76105	146.081					1445881856
Pos_10380	Positive	5.7749	99.0446					8955244544
Pos_10398	Positive	5.7749	325.113					149874656
Pos_10430	Positive	5.7888	102.055					1015449024
Pos_10570	Positive	5.83052	284.099					5085601792
Pos_10574	Positive	5.83052	300.121					474642624
Pos_10716	Positive	5.85835	196.094					1324884224
Pos_10789	Positive	5.87228	99.0446					4541896192
Pos_10804	Positive	5.87228	198.112					1952176000
Pos_10858	Positive	5.88627	143.034					1252171136
Pos_10863	Positive	5.88627	188.128					766702720
Pos_11054	Positive	5.92803	204.123					884097152
Pos_11099	Positive	5.94198	223.108					495924384
Pos_11172	Positive	5.95588	113.06					1117573632
Pos_11285	Positive	5.96983	203.139					327761280
Pos_11430	Positive	5.99795	107.049					391290080
Pos_11434	Positive	5.99795	131.049					551772864
Pos_11500	Positive	6.01188	197.128					520008544
Pos_11699	Positive	6.06777	196.094					1458228608
Pos_11789	Positive	6.0958	261.146					411483008
Pos_11836	Positive	6.1097	220.118					2383704320
Pos_11838	Positive	6.1097	224.092					1453273856
Pos_11853	Positive	6.1097	365.196					326242880
Pos_11927	Positive	6.13758	128.107					583572800
Pos_11947	Positive	6.13758	306.135					582571264
Pos_12034	Positive	6.1792	127.039					16249802752
Pos_12134	Positive	6.22115	170.081					2360730624
Pos_12166	Positive	6.235	109.065					429043328
Pos_12176	Positive	6.235	200.092					803553024
Pos_12250	Positive	6.26282	100.076					1238981120
Pos_12252	Positive	6.26282	124.04					2726154752
Pos_12261	Positive	6.26282	222.112					355743968
Pos_12319	Positive	6.27677	349.141					270812224
Pos_12321	Positive	6.27677	367.152					4677169664
Pos_12360	Positive	6.2908	281.15					285049056
Pos_12422	Positive	6.31872	163.039					1762157312
Pos_12436	Positive	6.31872	355.102					1218665984
Pos_12465	Positive	6.33263	196.094					790312256
Pos_12473	Positive	6.33263	369.205					1416381440
Pos_12589	Positive	6.37443	85.0289					1108828288
Pos_12591	Positive	6.37443	108.044					1043573568
Pos_12592	Positive	6.37443	126.055					2768523008
Pos_12596	Positive	6.37443	138.055					448763904
Pos_12666	Positive	6.40242	124.04					1180959360
Pos_12885	Positive	6.47202	124.04					2028476160
Pos_12979	Positive	6.4999	195.066					264708384
Pos_13025	Positive	6.5139	126.055					1945943936
Pos_13026	Positive	6.5139	133.102					595125376
Pos_13087	Positive	6.52775	210.112					1262395520
Pos_13088	Positive	6.52775	263.139					936591168
Pos_13139	Positive	6.5417	125.097					476476992
Pos_13145	Positive	6.5417	170.081					912391808
Pos_13281	Positive	6.58348	474.26					7657296896
Pos_13323	Positive	6.59747	263.104					314726976
Pos_13361	Positive	6.61137	179.034					520143296
Pos_13365	Positive	6.61137	243.088					342153056
Pos_13367	Positive	6.61137	245.186					917325696
Pos_13399	Positive	6.62525	193.086					749789120
Pos_13444	Positive	6.63917	141.055					431494592
Pos_13462	Positive	6.63917	433.134					156967376
Pos_13548	Positive	6.6671	198.076					378394336
Pos_13556	Positive	6.6671	303.134					641670528
Pos_13606	Positive	6.68097	198.112					413332800
Pos_13713	Positive	6.72267	160.097					844687232
Pos_13950	Positive	6.80623	171.029					613745088
Pos_13952	Positive	6.80623	181.05					854627072
Pos_14086	Positive	6.84795	196.094					1066660096
Pos_14097	Positive	6.84795	341.087					251539632
Pos_14196	Positive	6.87575	245.186					2542873088
Pos_14489	Positive	6.95922	144.081					1309878016
Pos_14512	Positive	6.95922	407.239					286734752
Pos_14760	Positive	7.01487	111.042					493789376
Pos_14861	Positive	7.04267	193.086					285853088
Pos_15057	Positive	7.08445	209.117					1538825472
Pos_15073	Positive	7.08445	438.214					379045408
Pos_15149	Positive	7.09833	204.124					2021501824
Pos_15201	Positive	7.1122	112.039					396666208
Pos_15207	Positive	7.1122	189.128					414415584
Pos_15262	Positive	7.12613	137.06					1351498752
Pos_15263	Positive	7.12613	140.071					1467200384
Pos_15264	Positive	7.12613	179.07					589941312
Pos_15445	Positive	7.16777	153.128					1600986752
Pos_15453	Positive	7.16777	279.17					244973520
Pos_15457	Positive	7.16777	313.143					244514928
Pos_15529	Positive	7.18163	325.143					399129312
Pos_15709	Positive	7.22345	189.128					593597696
Pos_15766	Positive	7.23733	149.096					804977856
Pos_15836	Positive	7.25123	207.138					4661384192
Pos_15851	Positive	7.25123	499.123					281182944
Pos_15852	Positive	7.25123	517.134					1245917056
Pos_15897	Positive	7.2652	135.117					1807226112
Pos_15906	Positive	7.2652	231.113					1035761792
Pos_16160	Positive	7.3209	163.039					2431939072
Pos_16163	Positive	7.3209	181.05					1533709952
Pos_16228	Positive	7.3348	179.034					632342208
Pos_16438	Positive	7.37645	121.065					499993568
Pos_16441	Positive	7.37645	138.055					605248064
Pos_16627	Positive	7.41825	170.081					583843264
Pos_16713	Positive	7.43212	156.102					480095744
Pos_16716	Positive	7.43212	174.112					461453088
Pos_16720	Positive	7.43212	265.143					1147614208
Pos_16793	Positive	7.44608	169.05					814955264
Pos_16939	Positive	7.47387	465.103					432914208
Pos_17193	Positive	7.52955	168.065					492802816
Pos_17199	Positive	7.52955	224.092					953346048
Pos_17436	Positive	7.57128	156.102					715742272
Pos_17439	Positive	7.57128	245.117					432108352
Pos_17506	Positive	7.58517	225.148					976415552
Pos_17514	Positive	7.58517	333.17					739330816
Pos_17567	Positive	7.59912	163.112					422543968
Pos_17870	Positive	7.6548	235.169					1174679424
Pos_17989	Positive	7.68258	369.118					263543488
Pos_18135	Positive	7.7104	174.112					313741312
Pos_18136	Positive	7.7104	184.097					421839392
Pos_18210	Positive	7.72425	181.123					2607944448
Pos_18217	Positive	7.72425	365.153					274101216
Pos_18284	Positive	7.73818	158.118					726812608
Pos_18358	Positive	7.75215	178.087					420104384
Pos_18430	Positive	7.7661	191.107					441457664
Pos_18431	Positive	7.7661	193.05					350959392
Pos_18432	Positive	7.7661	209.117					1561001600
Pos_18434	Positive	7.7661	227.128					2916310016
Pos_18495	Positive	7.78005	149.096					935700480
Pos_18957	Positive	7.86367	255.084					351619200
Pos_18968	Positive	7.86367	449.108					15728733184
Pos_19360	Positive	7.93328	181.123					984091648
Pos_19469	Positive	7.9472	327.159					516364064
Pos_19621	Positive	7.97503	207.138					1056138368
Pos_19629	Positive	7.97503	296.147					371292544
Pos_19716	Positive	7.98898	105.07					359676064
Pos_19726	Positive	7.98898	253.18					693939840
Pos_19731	Positive	7.98898	465.103					642200576
Pos_19781	Positive	8.00295	110.06					360749888
Pos_19796	Positive	8.00295	213.112					517265664
Pos_19882	Positive	8.01688	439.209					283233344
Pos_20022	Positive	8.04483	235.169					2185091328
Pos_20142	Positive	8.07282	103.05					1434170880
Pos_20150	Positive	8.07282	163.039					1380633728
Pos_20160	Positive	8.07282	355.102					201592160
Pos_20178	Positive	8.07282	517.134					2192731136
Pos_20246	Positive	8.08673	95.0861					558883968
Pos_20249	Positive	8.08673	119.086					424183136
Pos_20259	Positive	8.08673	172.097					675111552
Pos_20262	Positive	8.08673	207.138					2967044864
Pos_20524	Positive	8.1424	202.109					284483008
Pos_20525	Positive	8.1424	209.154					1238921728
Pos_20535	Positive	8.1424	371.206					621672384
Pos_20606	Positive	8.15642	151.112					880898304
Pos_20611	Positive	8.15642	237.185					980452288
Pos_20677	Positive	8.17037	465.139					670682944
Pos_20855	Positive	8.21203	163.039					616288896
Pos_20862	Positive	8.21203	238.107					304490144
Pos_20930	Positive	8.22605	251.164					1466349440
Pos_20932	Positive	8.22605	269.175					1606855808
Pos_20949	Positive	8.22605	499.123					928003392
Pos_21149	Positive	8.28187	409.162					198065760
Pos_21285	Positive	8.32367	153.128					499182720
Pos_21290	Positive	8.32367	233.154					1636072576
Pos_21292	Positive	8.32367	252.123					418897152
Pos_21338	Positive	8.33763	163.039					1305887872
Pos_21342	Positive	8.33763	177.054					746674752
Pos_21359	Positive	8.33763	499.123					747118592
Pos_21362	Positive	8.33763	517.134					2025700352
Pos_21395	Positive	8.35168	249.11					302357888
Pos_21434	Positive	8.36558	209.154					1766801408
Pos_21468	Positive	8.37948	133.102					2614915840
Pos_21477	Positive	8.37948	191.143					2794631936
Pos_21479	Positive	8.37948	197.117					3982160384
Pos_21533	Positive	8.3934	109.101					914849344
Pos_21536	Positive	8.3934	119.086					639264640
Pos_21545	Positive	8.3934	162.091					2762642432
Pos_21549	Positive	8.3934	175.149					620230080
Pos_21561	Positive	8.3934	247.108					306626528
Pos_21603	Positive	8.40727	193.05					4742817792
Pos_21698	Positive	8.43517	262.18					147603296
Pos_21700	Positive	8.43517	301.071					865381440
Pos_21755	Positive	8.44918	169.122					450143680
Pos_21761	Positive	8.44918	253.18					983689280
Pos_21907	Positive	8.49093	95.0861					744682496
Pos_21919	Positive	8.49093	175.149					969614912
Pos_21931	Positive	8.49093	433.113					829367744
Pos_22143	Positive	8.54665	165.055					617594112
Pos_22144	Positive	8.54665	167.107					604060736
Pos_22145	Positive	8.54665	169.122					708766208
Pos_22153	Positive	8.54665	287.055					487913952
Pos_22217	Positive	8.56055	269.175					736968704
Pos_22218	Positive	8.56055	303.086					593887424
Pos_22261	Positive	8.57453	197.117					2309132544
Pos_22315	Positive	8.58842	125.097					2049628800
Pos_22318	Positive	8.58842	171.102					346119136
Pos_22549	Positive	8.65803	205.122					479425248
Pos_22592	Positive	8.67203	181.123					781846976
Pos_22594	Positive	8.67203	208.097					855058816
Pos_22738	Positive	8.71392	227.128					770835456
Pos_22781	Positive	8.72783	161.128					490228736
Pos_22783	Positive	8.72783	201.164					2306959872
Pos_22784	Positive	8.72783	219.174					5441242112
Pos_22792	Positive	8.72783	361.092					465888544
Pos_22837	Positive	8.7417	163.112					1060859392
Pos_22874	Positive	8.75565	179.105					1670661888
Pos_23093	Positive	8.82555	193.123					405050208
Pos_23095	Positive	8.82555	236.131					347294464
Pos_23151	Positive	8.83945	249.148					537975296
Pos_23216	Positive	8.86732	105.07					660344320
Pos_23219	Positive	8.86732	167.107					1738227328
Pos_23276	Positive	8.88127	265.143					574029696
Pos_23349	Positive	8.90917	209.08					2066918784
Pos_23567	Positive	8.96498	225.148					2657608192
Pos_23571	Positive	8.96498	285.076					665150272
Pos_23575	Positive	8.96498	314.139					496238048
Pos_23579	Positive	8.96498	447.129					987060992
Pos_23616	Positive	8.97898	265.143					652615936
Pos_23620	Positive	8.97898	284.129					793427200
Pos_23630	Positive	8.97898	369.097					277393504
Pos_23802	Positive	9.03468	475.123					16103431168
Pos_23831	Positive	9.04868	271.06					1041727040
Pos_23889	Positive	9.07655	309.096					855773568
Pos_23900	Positive	9.07655	507.15					470595712
Pos_24101	Positive	9.14617	195.102					2807940864
Pos_24134	Positive	9.16042	285.076					2618475008
Pos_24178	Positive	9.18815	109.065					2817237248
Pos_24183	Positive	9.18815	135.081					782141632
Pos_24185	Positive	9.18815	153.091					2387191040
Pos_24226	Positive	9.20218	149.132					841248192
Pos_24233	Positive	9.20218	222.112					548361920
Pos_24323	Positive	9.22998	201.164					3942743040
Pos_24336	Positive	9.22998	461.108					961944576
Pos_24339	Positive	9.22998	475.123					776112192
Pos_24371	Positive	9.2439	95.0861					812043584
Pos_24373	Positive	9.2439	135.117					1843128576
Pos_24380	Positive	9.2439	197.117					1903016832
Pos_24381	Positive	9.2439	219.174					8703687680
Pos_24457	Positive	9.27172	81.0699					642375872
Pos_24506	Positive	9.28557	317.066					305711616
Pos_24544	Positive	9.29953	191.143					440711584
Pos_24549	Positive	9.29953	267.159					793876672
Pos_24621	Positive	9.32743	193.086					736306752
Pos_24698	Positive	9.35537	109.029					371448736
Pos_24708	Positive	9.35537	159.117					763186560
Pos_24713	Positive	9.35537	235.169					8680665088
Pos_24783	Positive	9.36923	223.169					450766816
Pos_24943	Positive	9.42492	394.189					291803040
Pos_25020	Positive	9.45282	219.136					409904448
Pos_25021	Positive	9.45282	251.164					2147865344
Pos_25138	Positive	9.48067	269.175					591171072
Pos_25145	Positive	9.48067	396.202					239339120
Pos_25172	Positive	9.4946	203.179					1875901312
Pos_25173	Positive	9.4946	317.066					294925472
Pos_25396	Positive	9.56435	153.091					1982097152
Pos_25403	Positive	9.56435	221.154					884285760
Pos_25441	Positive	9.57827	169.122					842573504
Pos_25539	Positive	9.62003	105.07					849000768
Pos_25549	Positive	9.62003	217.159					7249408000
Pos_25552	Positive	9.62003	227.128					1120825216
Pos_25555	Positive	9.62003	291.136					1060871360
Pos_25581	Positive	9.63393	149.132					847528064
Pos_25587	Positive	9.63393	209.154					1808234624
Pos_25588	Positive	9.63393	235.169					5386297856
Pos_25592	Positive	9.63393	253.18					6283104768
Pos_25629	Positive	9.64785	195.138					1125077120
Pos_25633	Positive	9.64785	275.2					1886669312
Pos_25710	Positive	9.67572	121.102					1390238592
Pos_25711	Positive	9.67572	137.096					907623104
Pos_25715	Positive	9.67572	191.143					3023339264
Pos_25765	Positive	9.68962	231.138					672739904
Pos_25836	Positive	9.71752	291.136					897575424
Pos_25881	Positive	9.7315	517.134					1425535744
Pos_25906	Positive	9.74537	207.138					715933504
Pos_25945	Positive	9.75927	225.148					844536448
Pos_25975	Positive	9.77322	271.06					10154225664
Pos_25980	Positive	9.77322	288.196					944239936
Pos_26106	Positive	9.82887	181.123					1038361408
Pos_26201	Positive	9.87063	175.149					842953216
Pos_26206	Positive	9.87063	217.159					8774083584
Pos_26213	Positive	9.87063	318.3					3574782720
Pos_26249	Positive	9.88458	135.117					1145748096
Pos_26250	Positive	9.88458	149.132					1659790464
Pos_26256	Positive	9.88458	207.138					1806688896
Pos_26263	Positive	9.88458	313.237					688166592
Pos_26268	Positive	9.88458	348.274					1390108544
Pos_26328	Positive	9.89847	213.148					807020736
Pos_26330	Positive	9.89847	277.217					1307708928
Pos_26403	Positive	9.92627	285.076					1916802560
Pos_26410	Positive	9.92627	489.139					32239140864
Pos_26523	Positive	9.98205	331.082					1592353408
Pos_26547	Positive	9.99595	361.092					1231956992
Pos_26576	Positive	10.0098	191.143					2036494720
Pos_26624	Positive	10.0237	175.149					1696123264
Pos_26657	Positive	10.0377	201.164					5800748544
Pos_26660	Positive	10.0377	251.164					2393822208
Pos_26686	Positive	10.0517	293.212					1403930368
Pos_26756	Positive	10.0795	291.195					461979840
Pos_26758	Positive	10.0795	309.206					1090833280
Pos_26844	Positive	10.1211	125.097					3898093824
Pos_26849	Positive	10.1211	235.169					9904992256
Pos_26850	Positive	10.1211	253.18					11341307904
Pos_26936	Positive	10.163	439.209					587876160
Pos_26968	Positive	10.1769	133.102					1448804608
Pos_27133	Positive	10.2464	195.066					2449429248
Pos_27140	Positive	10.2464	316.285					1775786240
Pos_27171	Positive	10.2604	161.128					1990529152
Pos_27227	Positive	10.2881	267.159					979300800
Pos_27326	Positive	10.3298	235.133					514707264
Pos_27403	Positive	10.3577	311.222					2732897536
Pos_27518	Positive	10.3994	275.2					2701437696
Pos_27615	Positive	10.4411	277.217					1654273536
Pos_27729	Positive	10.4967	109.101					1670394624
Pos_27743	Positive	10.4967	229.122					7998212096
Pos_27777	Positive	10.5105	235.169					12004315136
Pos_27871	Positive	10.5522	200.129					466931360
Pos_27872	Positive	10.5522	203.179					6284159488
Pos_27966	Positive	10.594	213.127					798495552
Pos_27970	Positive	10.594	249.148					2426284544
Pos_27993	Positive	10.6079	291.195					3619121152
Pos_28030	Positive	10.6218	353.23					422566368
Pos_28032	Positive	10.6218	369.205					510423360
Pos_28126	Positive	10.6774	375.108					2394170624
Pos_28150	Positive	10.6913	253.18					4924730368
Pos_28199	Positive	10.7191	109.101					4273349376
Pos_28263	Positive	10.7469	291.195					3025995776
Pos_28319	Positive	10.7747	304.299					429678976
Pos_28499	Positive	10.8581	313.237					909153600
Pos_28523	Positive	10.872	217.158					9614329856
Pos_28557	Positive	10.8859	231.138					2318611712
Pos_28586	Positive	10.8998	105.07					1552566144
Pos_28605	Positive	10.8998	215.143					3506331648
Pos_28611	Positive	10.8998	251.164					27093454848
Pos_28618	Positive	10.8998	309.206					1082692096
Pos_28641	Positive	10.9137	133.102					1206535552
Pos_28644	Positive	10.9137	161.128					1159866752
Pos_28649	Positive	10.9137	291.195					2201507072
Pos_28674	Positive	10.9276	201.164					17705779200
Pos_28678	Positive	10.9276	235.169					13272185856
Pos_28682	Positive	10.9276	260.201					1503657216
Pos_28712	Positive	10.9414	219.174					11504734208
Pos_28790	Positive	10.9831	285.076					10790958080
Pos_28854	Positive	11.0248	125.097					2926378496
Pos_28887	Positive	11.0386	203.179					8254372352
Pos_28923	Positive	11.0525	293.212					2079544576
Pos_28927	Positive	11.0525	307.19					1014299264
Pos_28963	Positive	11.0664	181.123					808394240
Pos_28994	Positive	11.0803	277.217					2529611520
Pos_28998	Positive	11.0803	295.227					2492937472
Pos_29157	Positive	11.1637	217.158					5654401536
Pos_29284	Positive	11.2193	253.18					1935648512
Pos_29326	Positive	11.247	307.19					996290240
Pos_29358	Positive	11.2609	199.149					764497024
Pos_29361	Positive	11.2609	237.185					1558277120
Pos_29367	Positive	11.2609	328.248					363075712
Pos_29450	Positive	11.3026	119.086					824589824
Pos_29455	Positive	11.3026	295.227					3111006464
Pos_29490	Positive	11.3165	203.179					5817801216
Pos_29492	Positive	11.3165	217.159					4514928128
Pos_29543	Positive	11.3305	349.178					702541312
Pos_29561	Positive	11.3443	293.212					2190296576
Pos_29563	Positive	11.3443	328.248					465854304
Pos_29597	Positive	11.3583	518.325					3363492608
Pos_29737	Positive	11.4279	467.194					368084160
Pos_29762	Positive	11.4419	249.148					830993472
Pos_29763	Positive	11.4419	266.175					623145984
Pos_29794	Positive	11.4558	257.19					295092032
Pos_29821	Positive	11.4697	273.185					501692320
Pos_29867	Positive	11.4977	244.17					598057408
Pos_29969	Positive	11.5536	119.086					948439488
Pos_29983	Positive	11.5536	437.196					293851840
Pos_30045	Positive	11.5815	123.08					714722880
Pos_30055	Positive	11.5815	237.185					1828317952
Pos_30057	Positive	11.5815	257.19					689538240
Pos_30074	Positive	11.5954	121.102					509926208
Pos_30166	Positive	11.6372	277.217					811604032
Pos_30168	Positive	11.6372	295.227					2315744512
Pos_30174	Positive	11.6372	335.222					584523904
Pos_30220	Positive	11.6511	315.253					590943104
Pos_30294	Positive	11.6929	291.195					592074240
Pos_30313	Positive	11.6929	447.129					496797856
Pos_30429	Positive	11.7488	343.188					1124243840
Pos_30457	Positive	11.7627	217.159					1987395712
Pos_30489	Positive	11.7766	311.222					1409493504
Pos_30511	Positive	11.7905	201.164					2574467840
Pos_30537	Positive	11.8044	260.201					761394944
Pos_30560	Positive	11.8184	167.107					516806528
Pos_30664	Positive	11.8741	159.117					392362336
Pos_30667	Positive	11.8741	187.108					546414528
Pos_30668	Positive	11.8741	211.112					275496000
Pos_30674	Positive	11.8741	247.133					1349816448
Pos_30686	Positive	11.8741	520.341					2751583744
Pos_30817	Positive	11.9437	253.18					613294400
Pos_30818	Positive	11.9437	268.17					1845733120
Pos_30838	Positive	11.9576	215.143					821268160
Pos_30858	Positive	11.9715	201.164					1370309760
Pos_30863	Positive	11.9715	231.138					908915648
Pos_30906	Positive	11.9854	311.222					873332992
Pos_30971	Positive	12.0133	277.18					384183616
Pos_31006	Positive	12.0273	277.217					17988431872
Pos_31034	Positive	12.0413	293.212					1093141888
Pos_31038	Positive	12.0413	520.341					20602644480
Pos_31122	Positive	12.0971	186.076					1604864256
Pos_31125	Positive	12.0971	219.174					4931209216
Pos_31151	Positive	12.111	109.101					1002822272
Pos_31164	Positive	12.111	237.185					1349255552
Pos_31168	Positive	12.111	273.112					649439872
Pos_31191	Positive	12.111	616.346					147255920
Pos_31249	Positive	12.139	532.348					169364784
Pos_31273	Positive	12.1529	245.117					704692352
Pos_31342	Positive	12.181	203.179					787293184
Pos_31386	Positive	12.1949	231.138					314185408
Pos_31393	Positive	12.1949	291.195					434581824
Pos_31423	Positive	12.2089	275.2					845591744
Pos_31428	Positive	12.2089	293.212					2743478784
Pos_31431	Positive	12.2089	309.206					714870336
Pos_31454	Positive	12.2229	496.34					1710818688
Pos_31532	Positive	12.2645	343.188					997369984
Pos_31554	Positive	12.2786	116.071					3779365376
Pos_31591	Positive	12.2926	118.086					3290755840
Pos_31745	Positive	12.3208	703.575					114609288
Pos_31857	Positive	12.3628	518.322					419124096
Pos_32004	Positive	12.4189	217.159					19316547584
Pos_32022	Positive	12.4189	522.356					195698512
Pos_32104	Positive	12.4469	317.209					202992048
Pos_32630	Positive	12.6157	744.591					92139072
Pos_32636	Positive	12.6157	758.569					181970880
Pos_32638	Positive	12.6157	760.585					249912576
Pos_32650	Positive	12.6157	782.569					49364884
Pos_34604	Positive	13.2486	607.256					35524948
Pos_34849	Positive	13.3045	766.572					87102456
Pos_34860	Positive	13.3045	786.601					151692320
Pos_35452	Positive	13.4302	116.071					1596761728
Pos_35454	Positive	13.4302	118.086					1720522240
Pos_35759	Positive	13.4579	104.108					671372352
Pos_35823	Positive	13.4579	268.104					174537344
Pos_35898	Positive	13.4718	126.055					367712768
Pos_35955	Positive	13.4856	130.05					1470301952
Pos_35960	Positive	13.4856	204.087					3846358784
Pos_36006	Positive	13.4995	99.0446					1897464704
Pos_36007	Positive	13.4995	127.04					5011497472
Pos_36012	Positive	13.4995	143.034					811718272
Pos_36013	Positive	13.4995	144.066					1632583040
Pos_36014	Positive	13.4995	145.05					15706682368
Pos_36016	Positive	13.4995	146.082					1013109440
Pos_36017	Positive	13.4995	154.086					582046016
Pos_36067	Positive	13.5133	130.087					622506048
Pos_36072	Positive	13.5133	196.094					486608384
Pos_36076	Positive	13.5133	285.076					491618336
Pos_36236	Positive	13.5826	156.102					868695296
Pos_36238	Positive	13.5826	180.102					1799493504
Pos_36239	Positive	13.5826	182.081					3802885888
Pos_36240	Positive	13.5826	182.118					499418240
Pos_36244	Positive	13.5826	216.124					3792348160
Pos_36247	Positive	13.5826	252.123					826800064
Pos_36297	Positive	13.6103	128.107					982393408
Pos_36685	Positive	13.8043	182.081					3116291584
Pos_36686	Positive	13.8043	193.05					314226816
Pos_36687	Positive	13.8043	196.094					687183616
Pos_36712	Positive	13.8181	130.087					615057280
Pos_36717	Positive	13.8181	156.102					869087296
Pos_36724	Positive	13.8181	180.102					1882158336
Pos_36726	Positive	13.8181	197.117					469386752
